# Supplementary material
Source: publisher figshare collection journal article supplement (https://acs.figshare.com/ndownloader/files/4687369)
Supplement: Supplementary file 1 [file 4687369]

# The Lysosome and HER3 (ErbB3) Selective Anticancer Agent Kahalalide F: Semisynthetic Modifications and Antifungal Lead-Exploration Studies

## Supporting Information

Abbas Gholipour Shilabin,<sup>1</sup> Noer Kasanah,<sup>1</sup>  
David E. Wedge<sup>2</sup> and Mark T. Hamann<sup>1\*</sup>

<sup>1</sup>*Dept of Pharmacognosy, School of Pharmacy, the University of Mississippi, University, MS 38677*

<sup>2</sup>*ARS, Natural Product Utilization Research Unit, National Center for Natural Products Research, University of Mississippi, University, MS 38677*

### Table of Contents

|                                                                                                                                                                                                            |         |
|------------------------------------------------------------------------------------------------------------------------------------------------------------------------------------------------------------|---------|
| <sup>1</sup> H NMR and <sup>13</sup> C NMR spectra of KF ( <b>1</b> ) in DMSO- <i>d</i> <sub>6</sub> at room temperature at 10 mg/180 μL.                                                                  | S2-S3   |
| <sup>1</sup> H NMR, <sup>13</sup> C NMR and DEPT 135° spectra of compound <b>3</b> in DMSO- <i>d</i> <sub>6</sub> at room temperature at 10 mg/180 μL.                                                     | S4-S6   |
| <sup>1</sup> H NMR and DEPT 135° spectra of KF-analogs <b>4</b> , <b>5</b> , <b>7</b> , <b>8</b> , <b>10</b> , <b>11</b> and <b>16</b> in DMSO- <i>d</i> <sub>6</sub> at room temperature at 10 mg/180 μL. | S7-S20  |
| Activity data (Molar) of 60 NCI cell lines for 4-Fluoro-benzylamino-KF ( <b>5</b> )                                                                                                                        | S21-S24 |
| Activity data (Molar) of 60 NCI cell lines for 4-Pyridinyl-methylamino-KF ( <b>7</b> )                                                                                                                     | S25-S28 |
| Activity data (Molar) of 60 NCI cell lines for 2-Thienyl-methylamino-KF ( <b>8</b> )                                                                                                                       | S29-S32 |
| Activity data (Molar) of 60 NCI cell lines for DEAC-KF-amide ( <b>16</b> )                                                                                                                                 | S33-S36 |
| Fluorescence images                                                                                                                                                                                        | S37     |
| Bioautograms                                                                                                                                                                                               | S38-S40 |

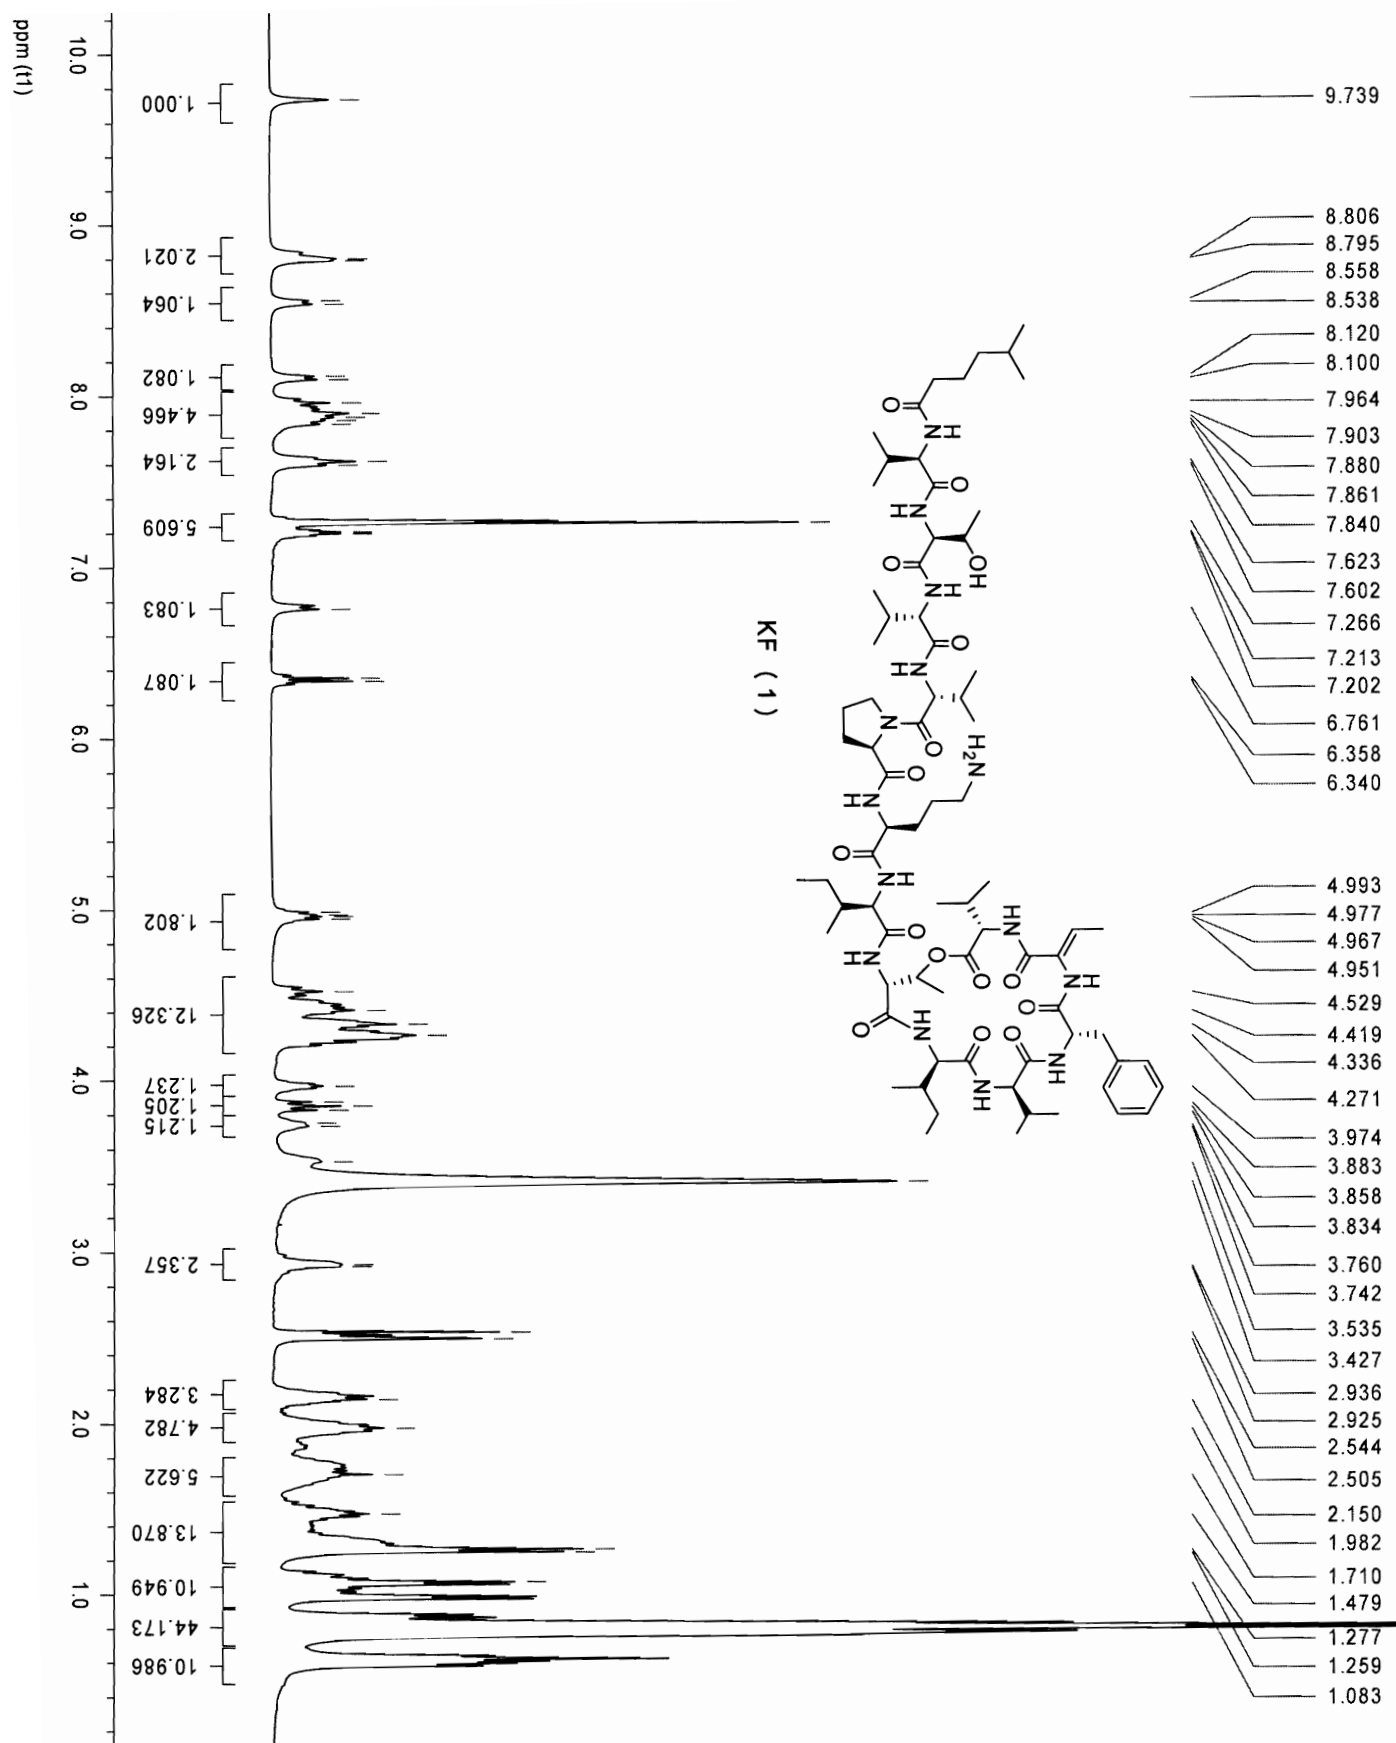

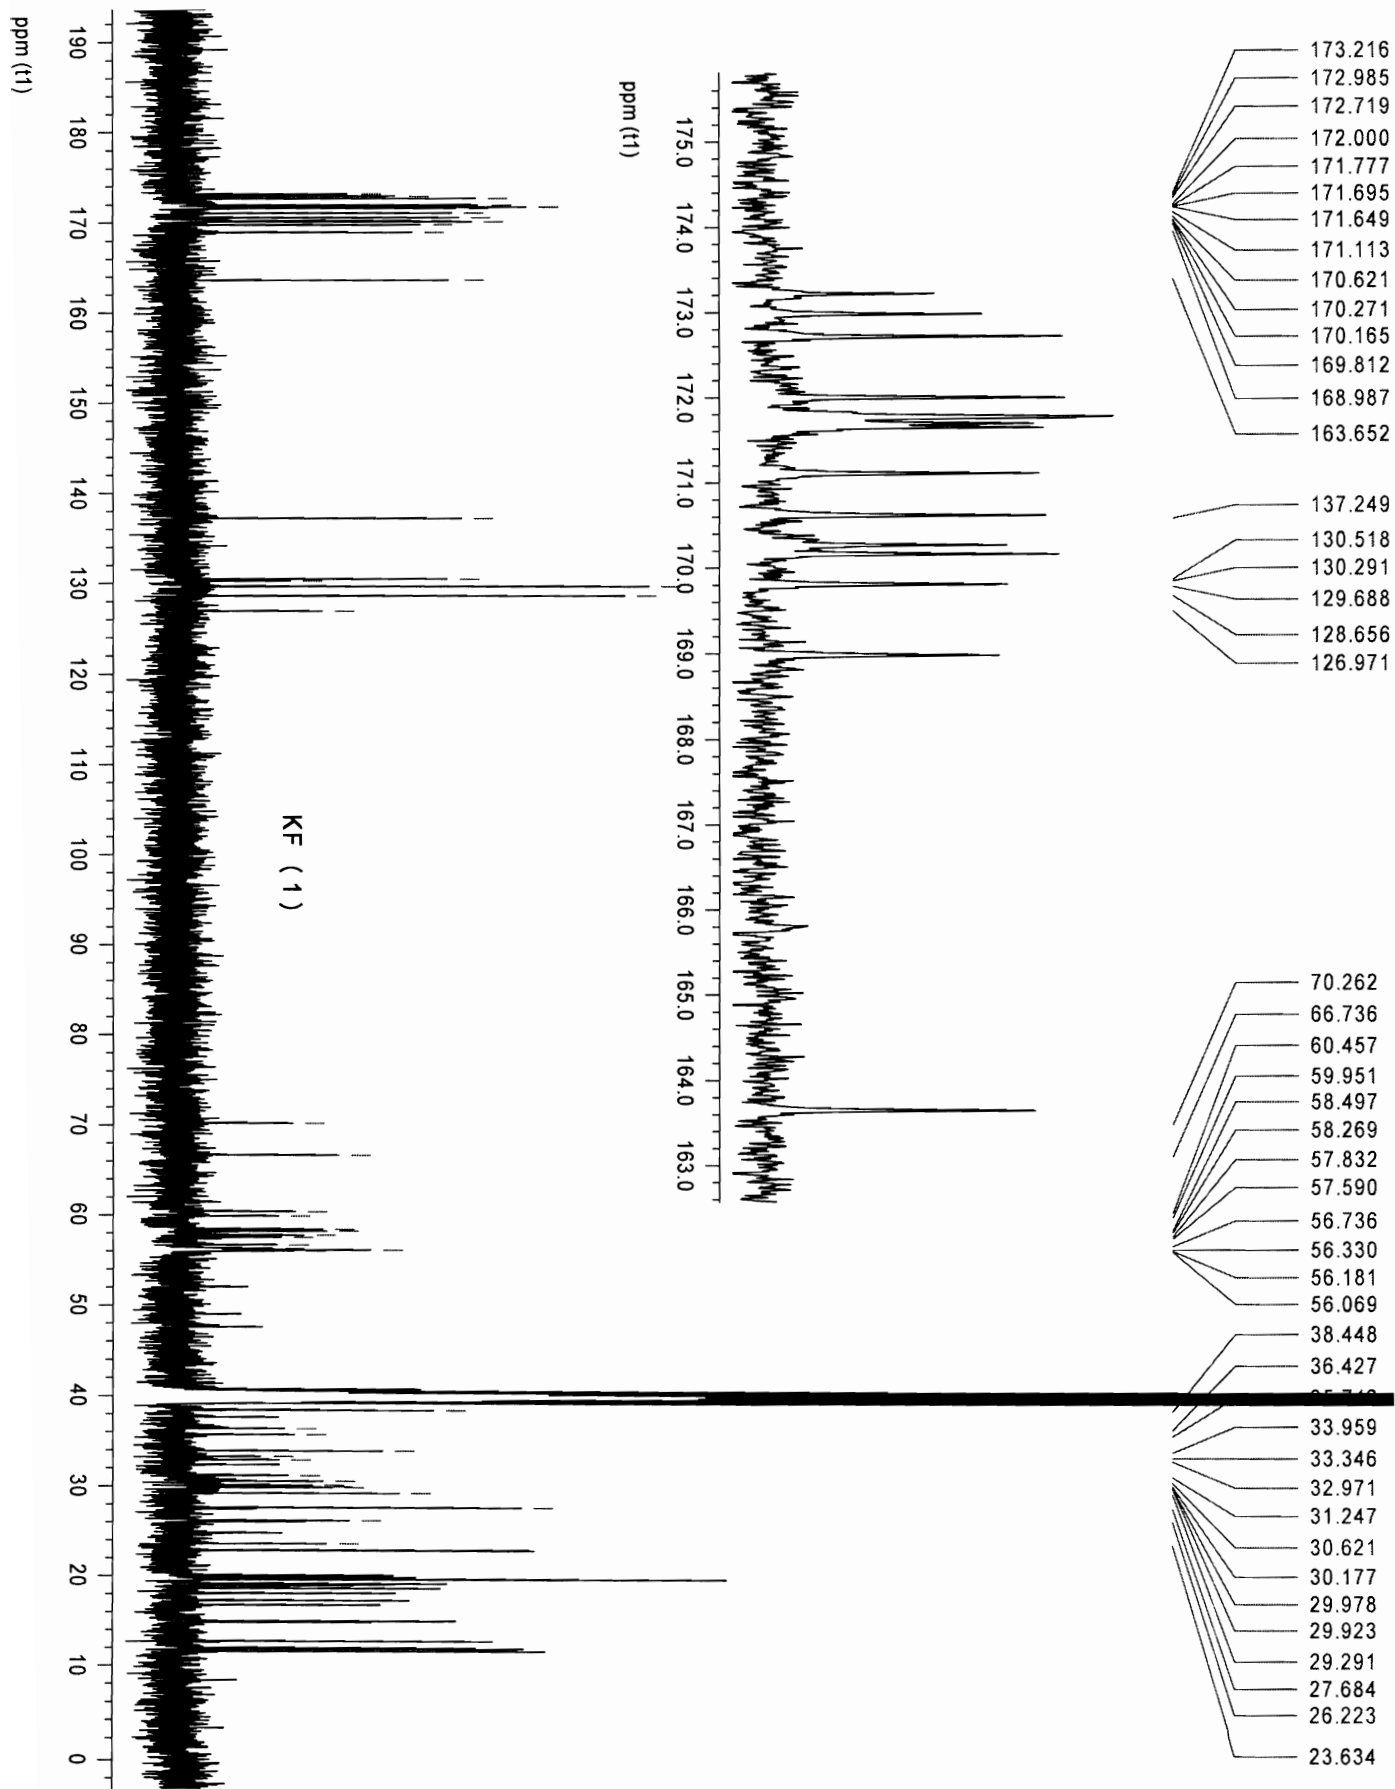

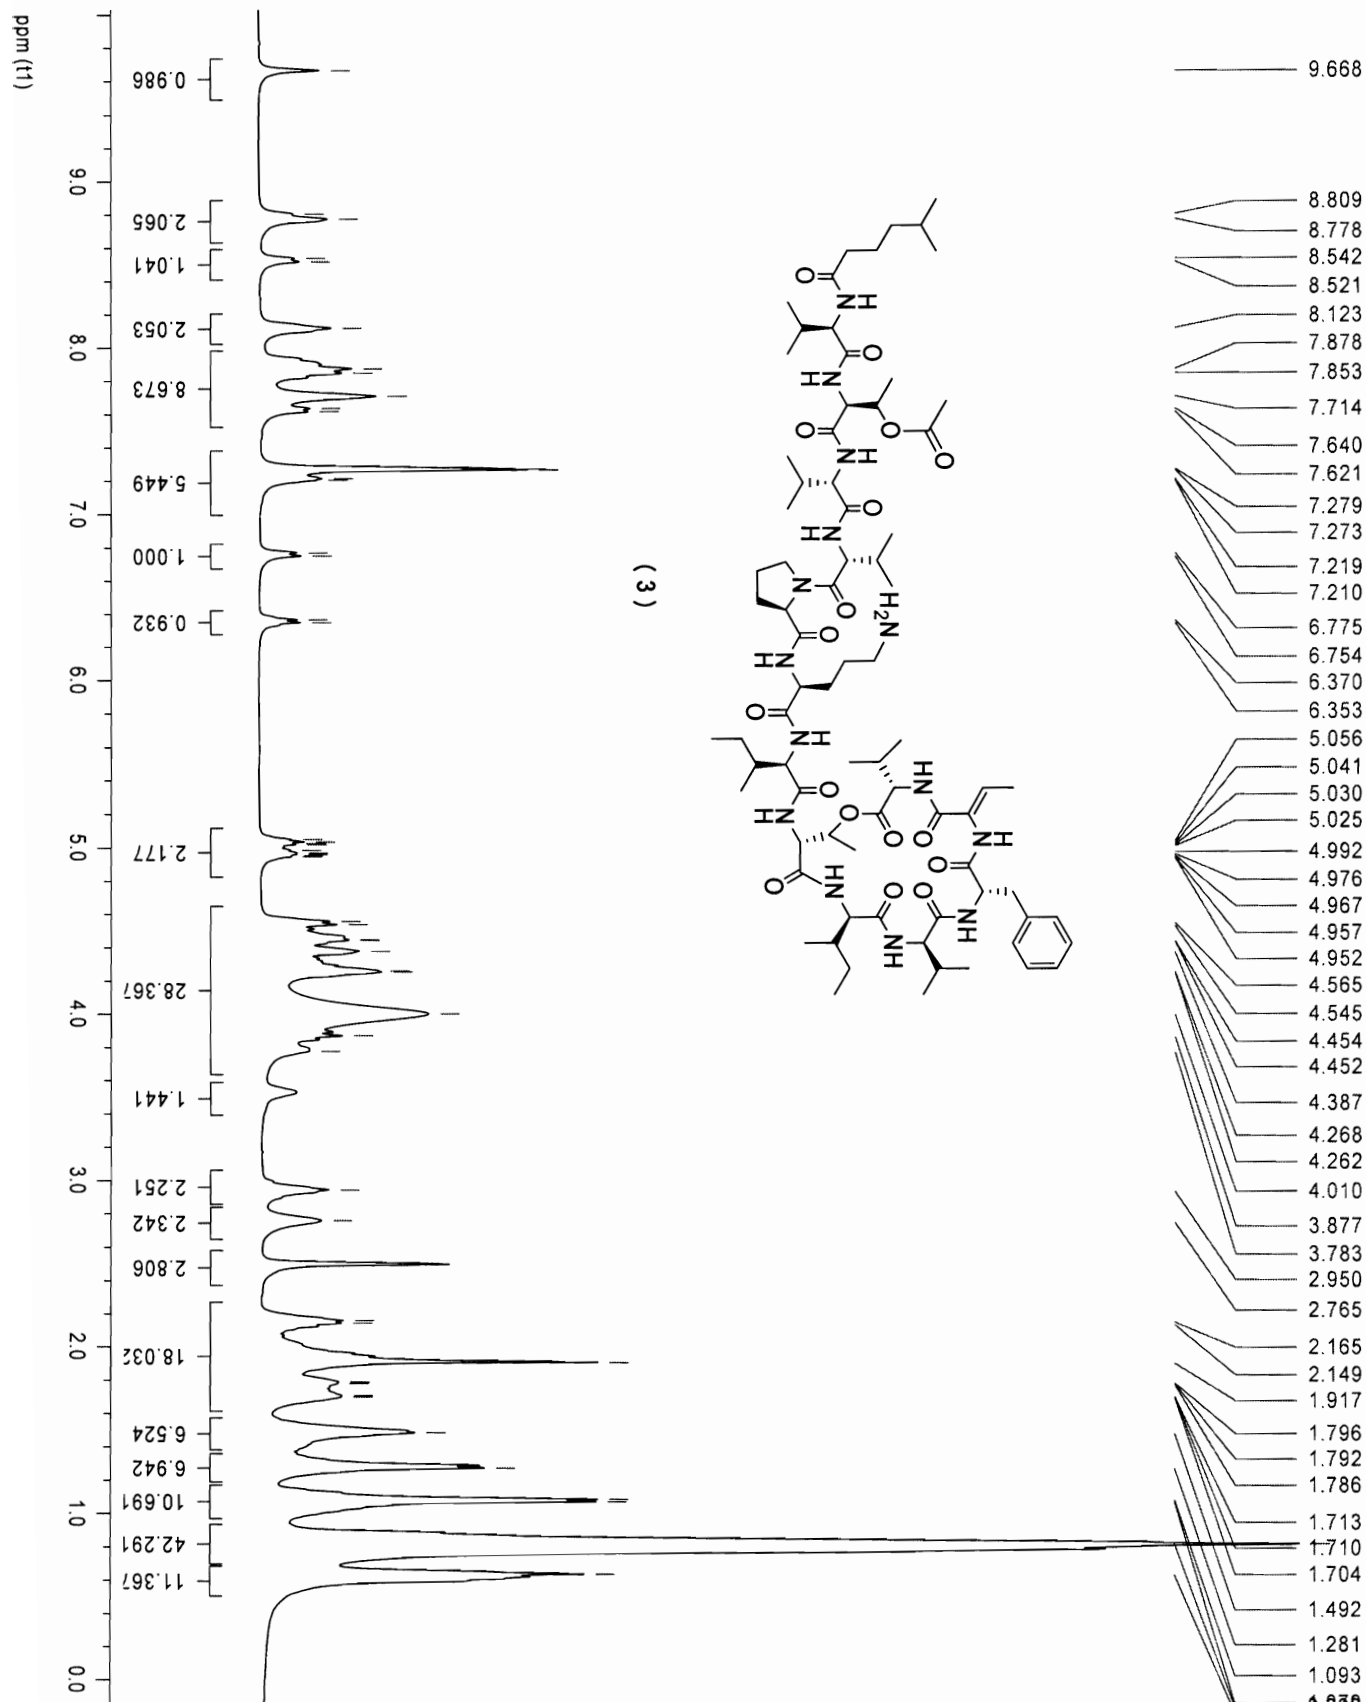

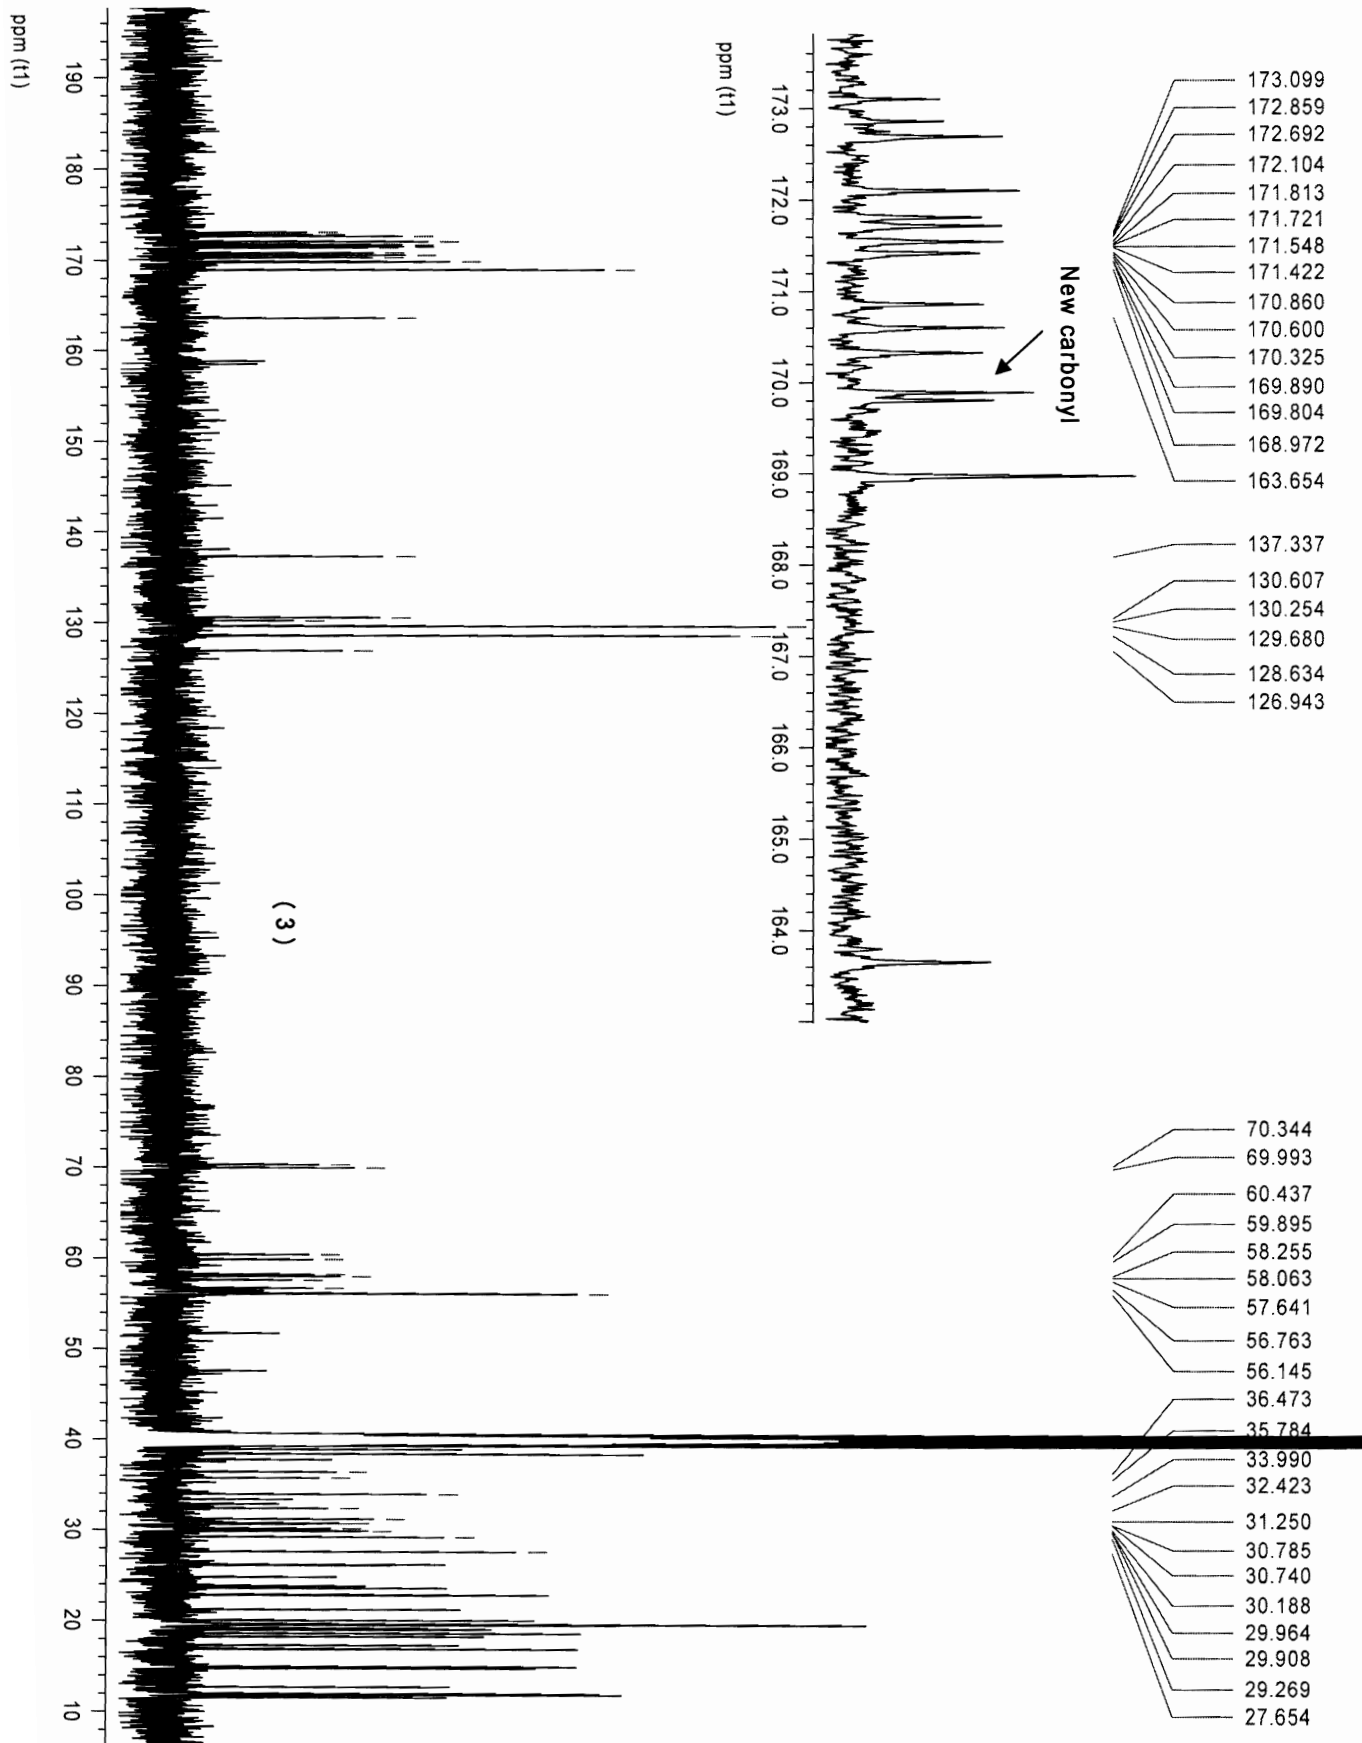

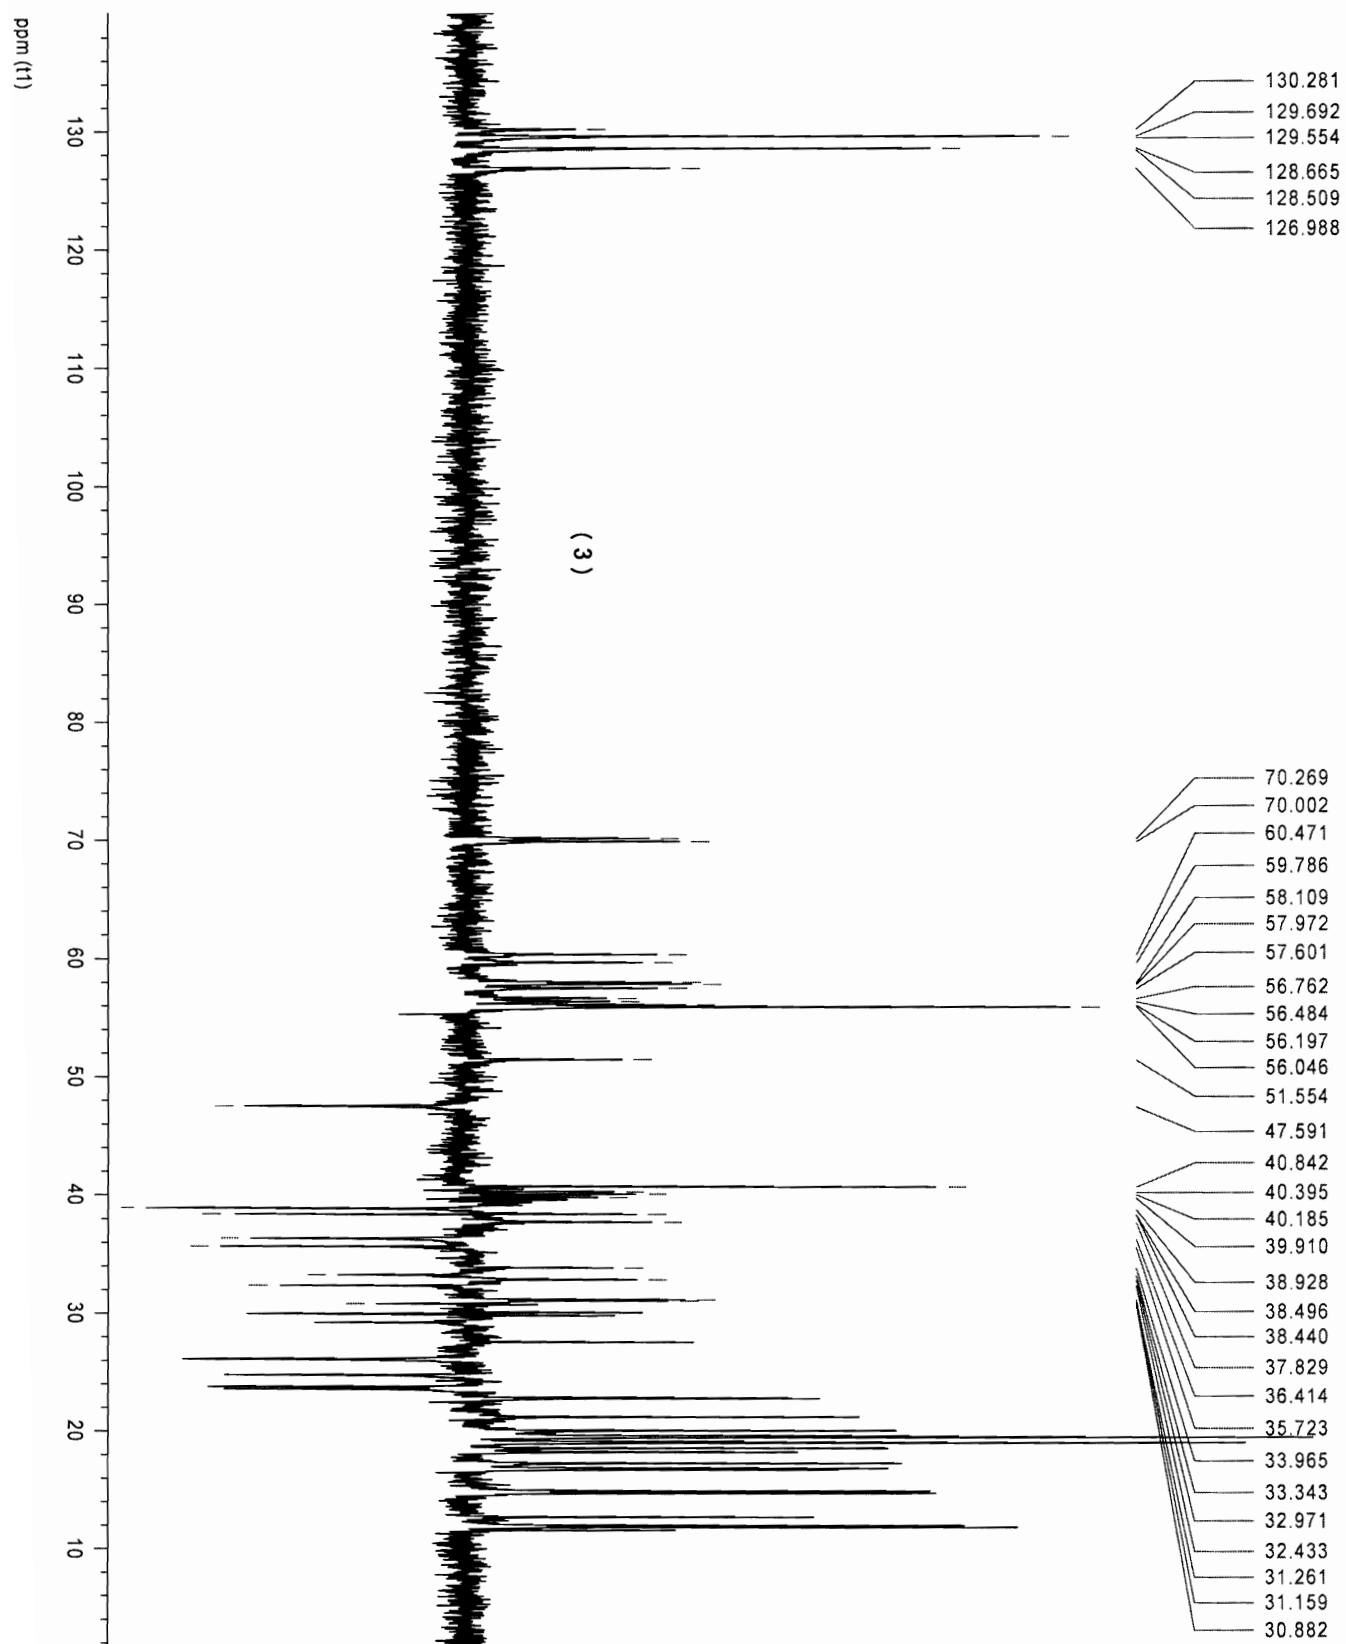

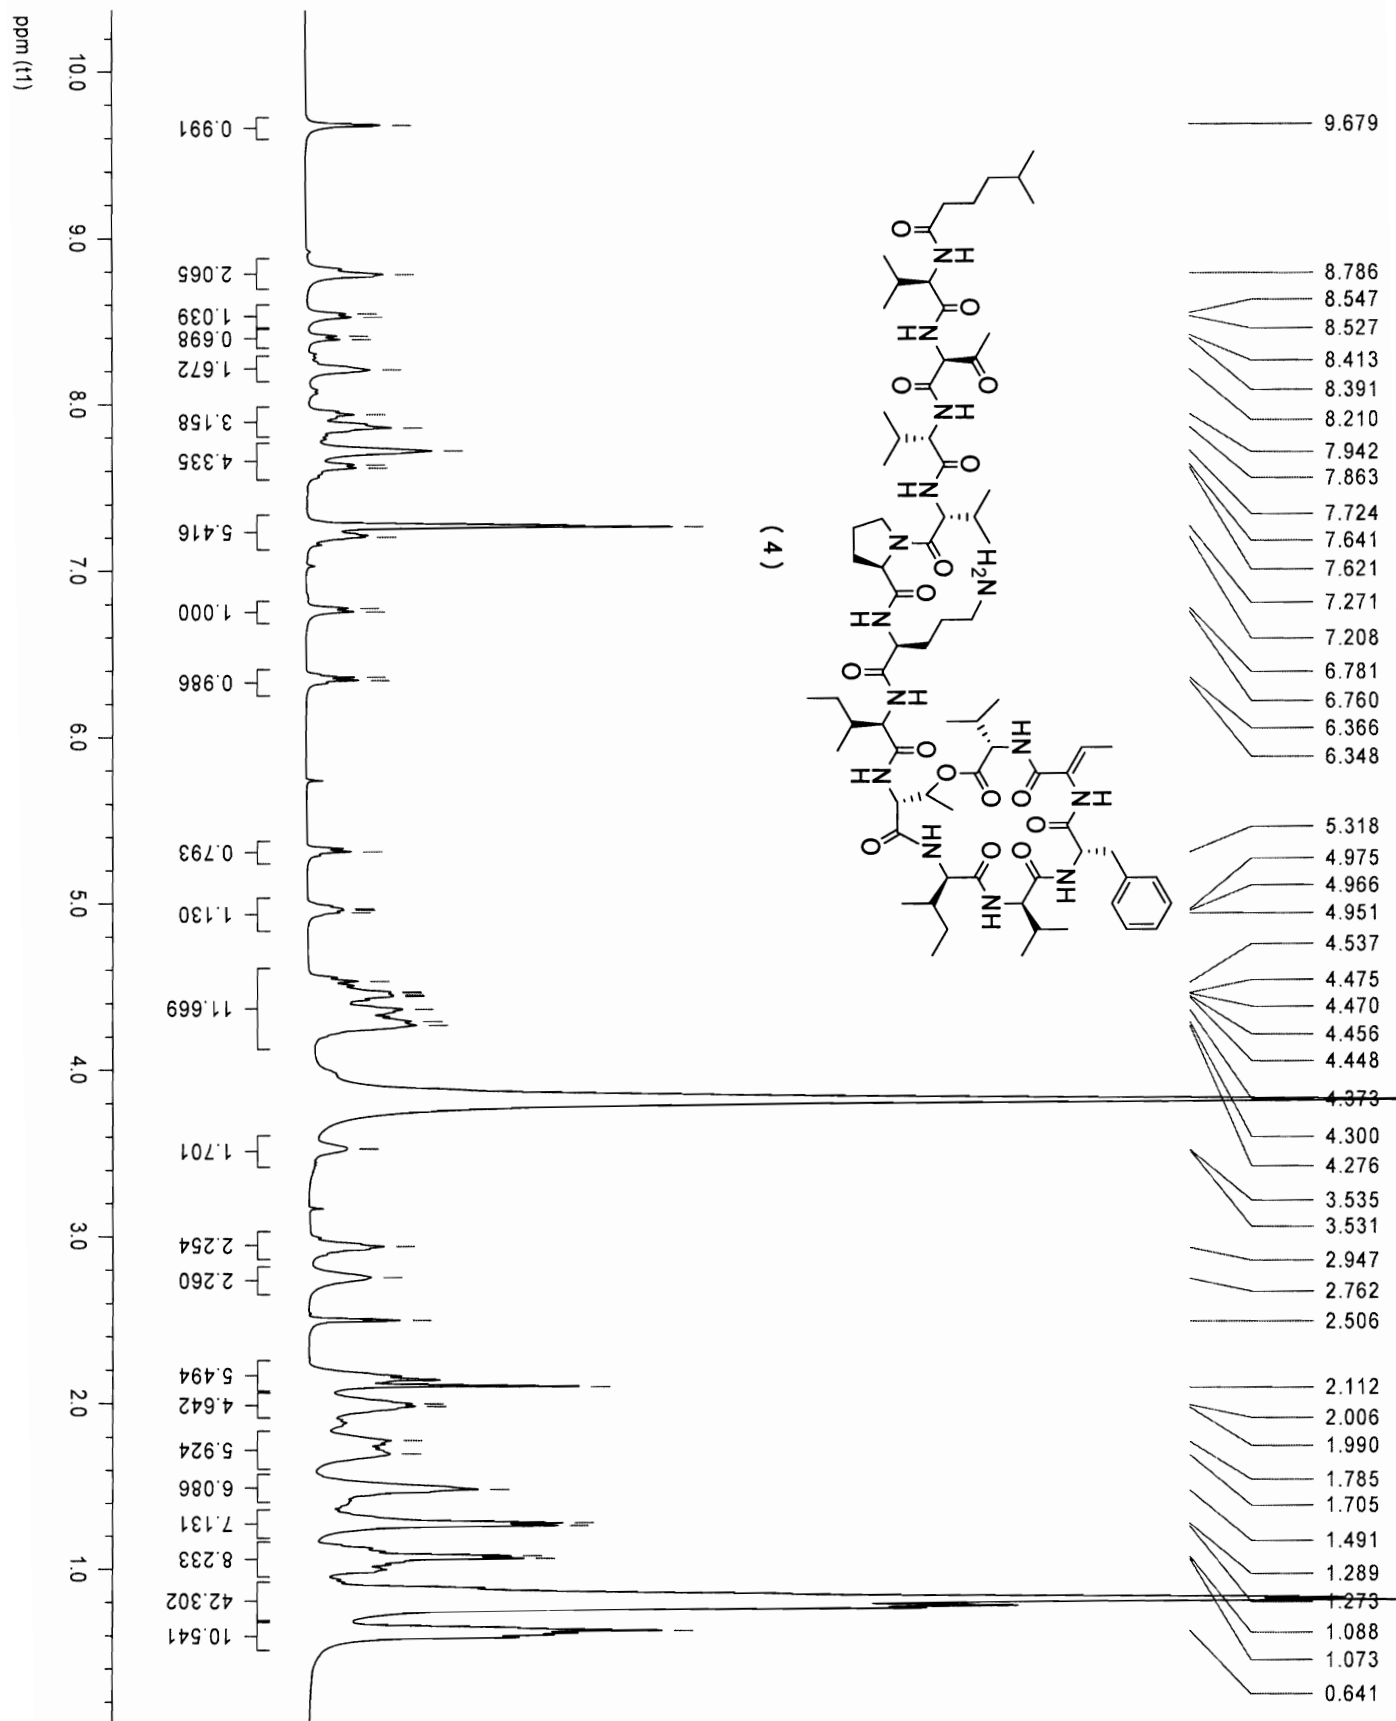

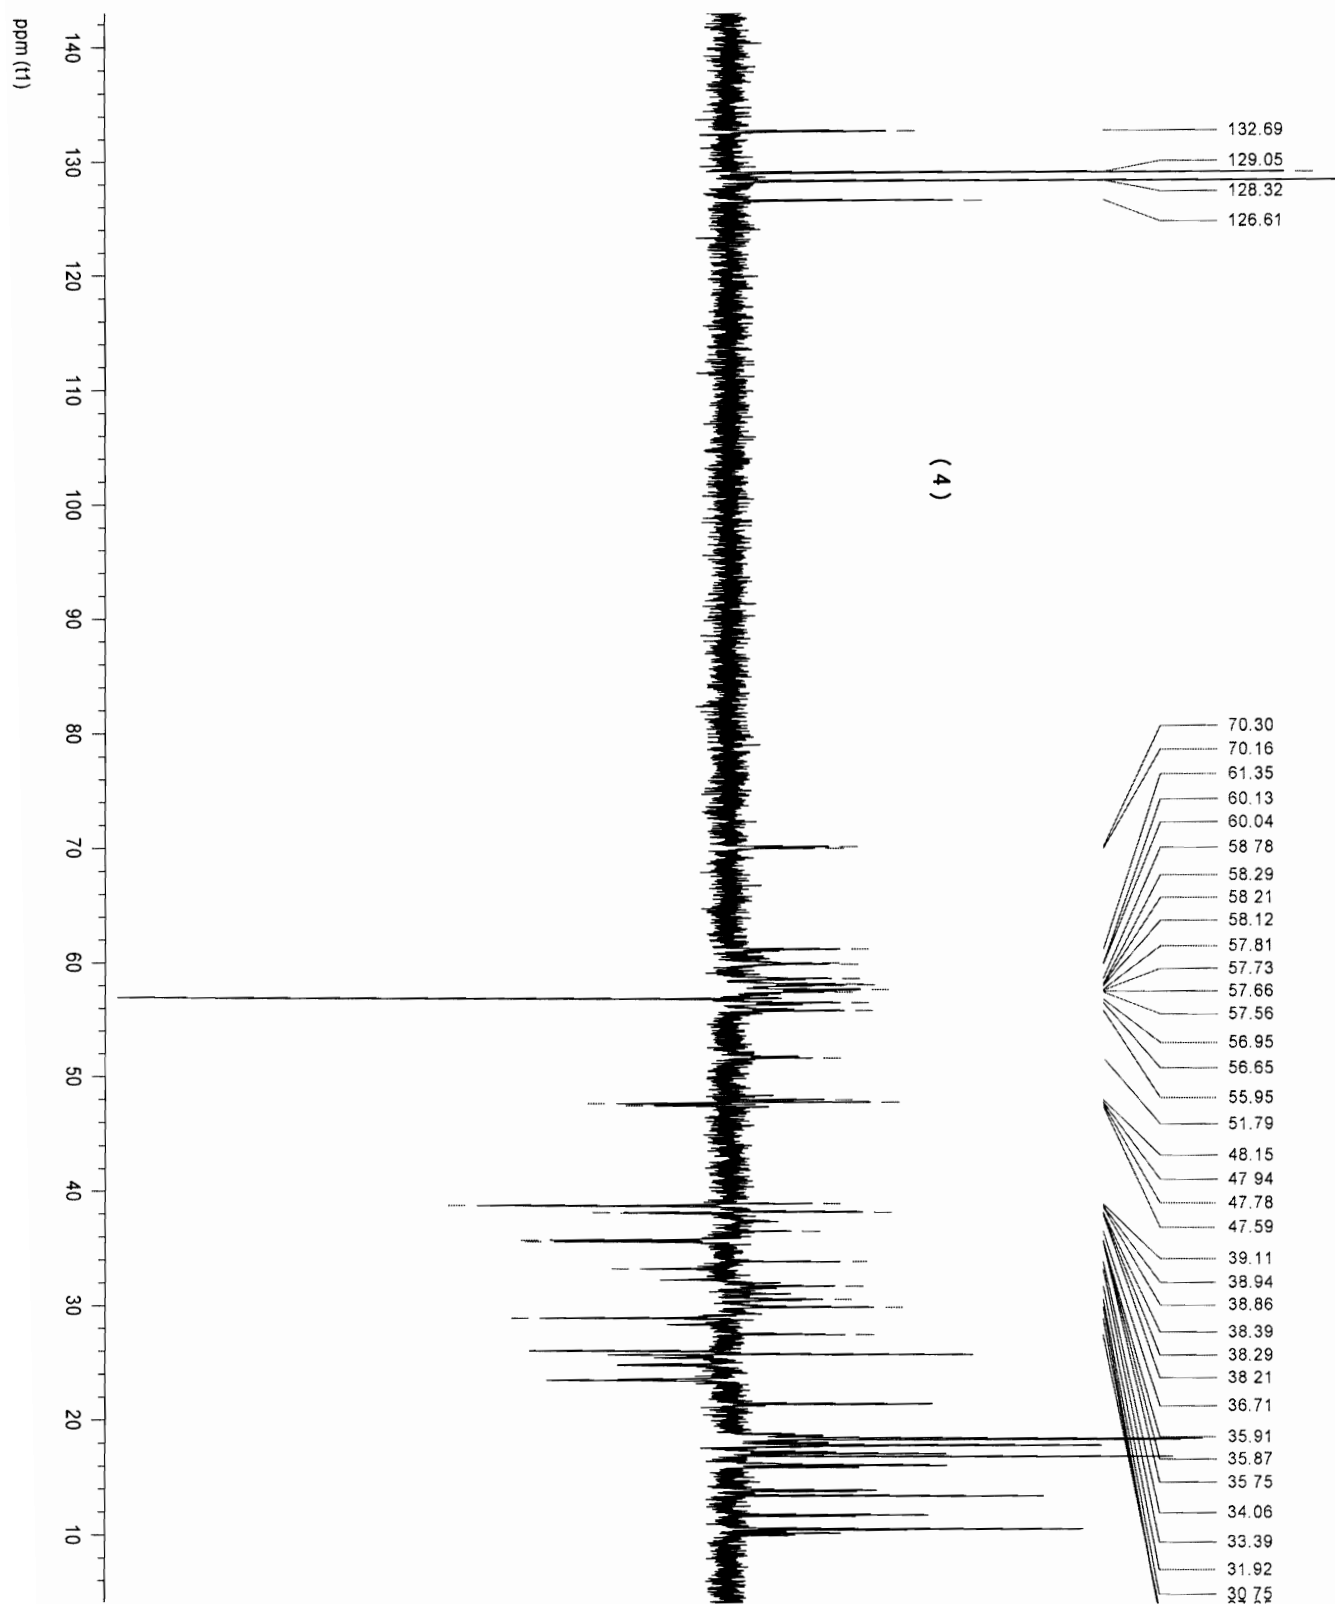





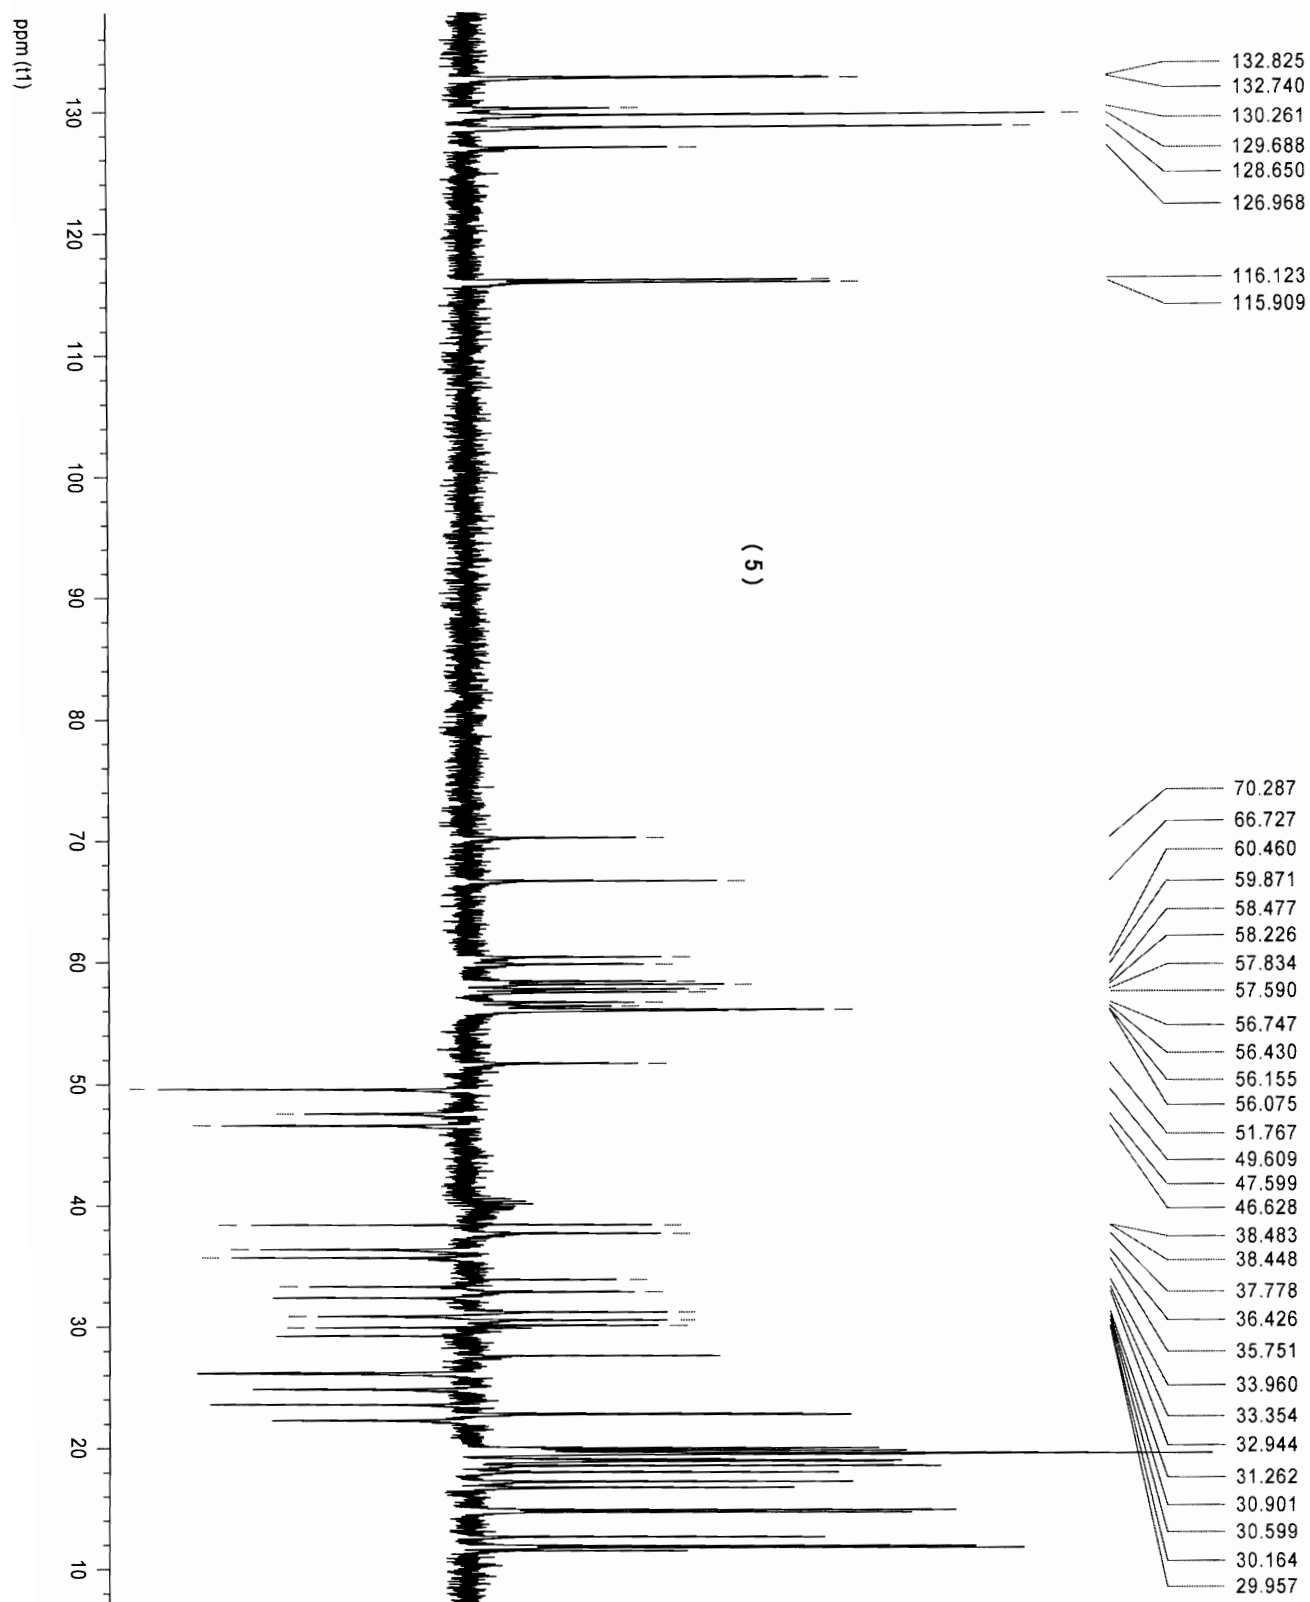



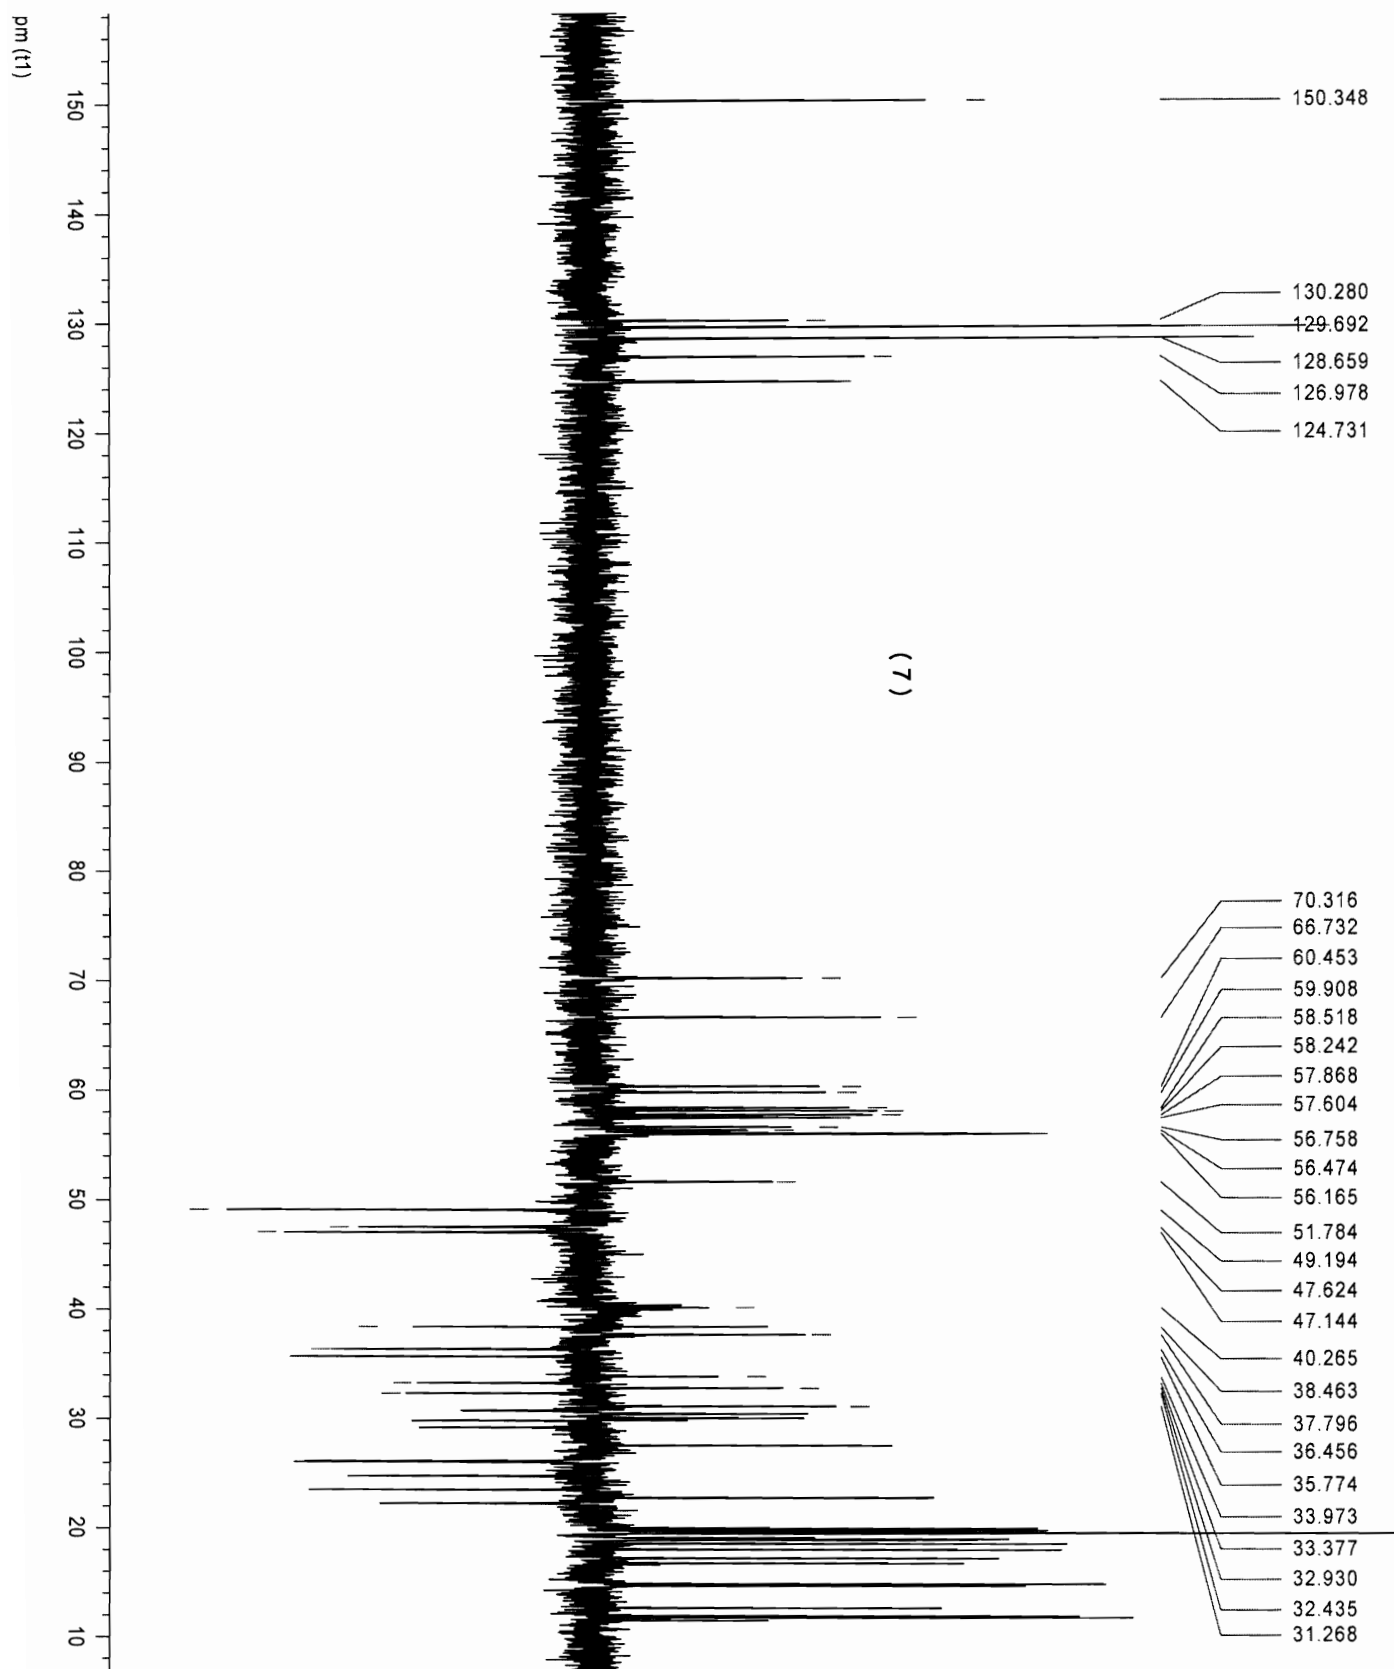



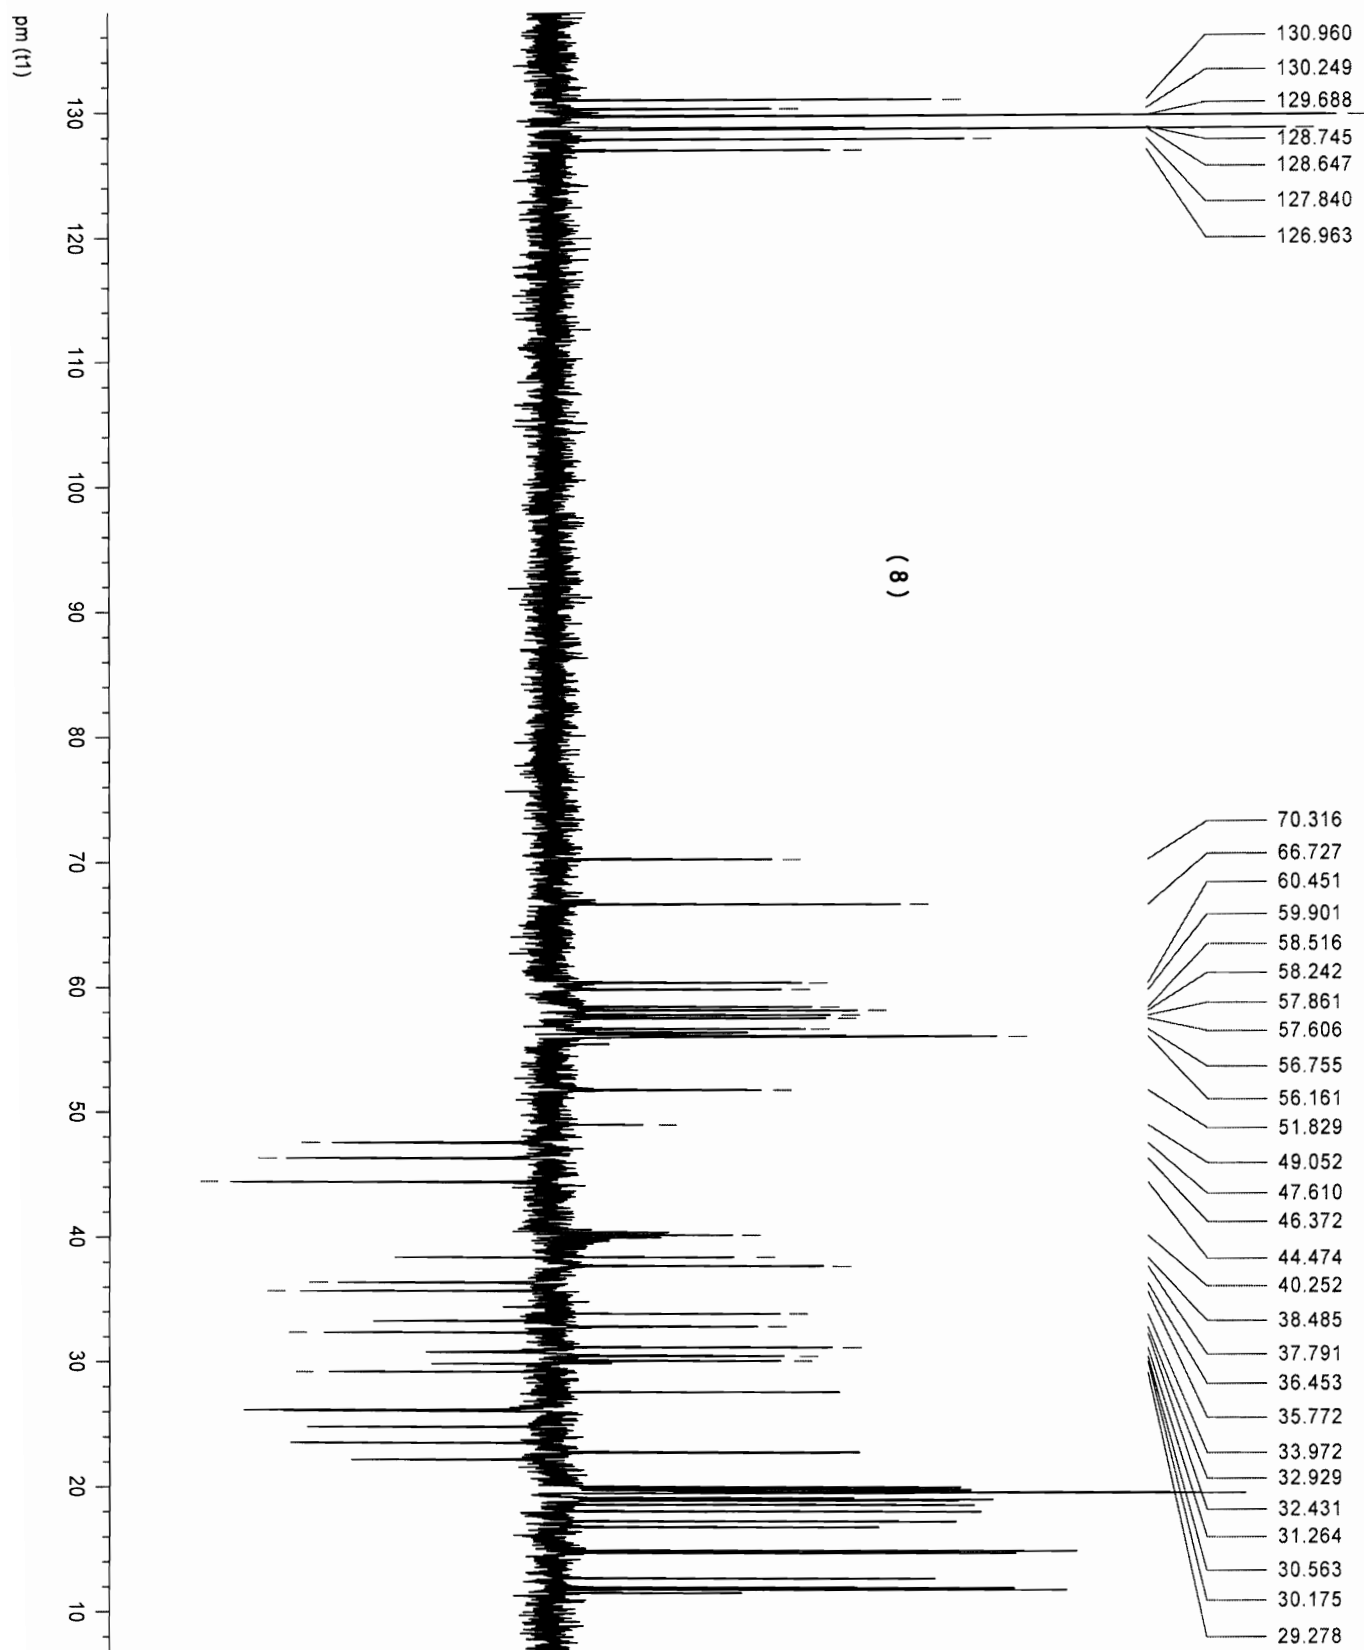



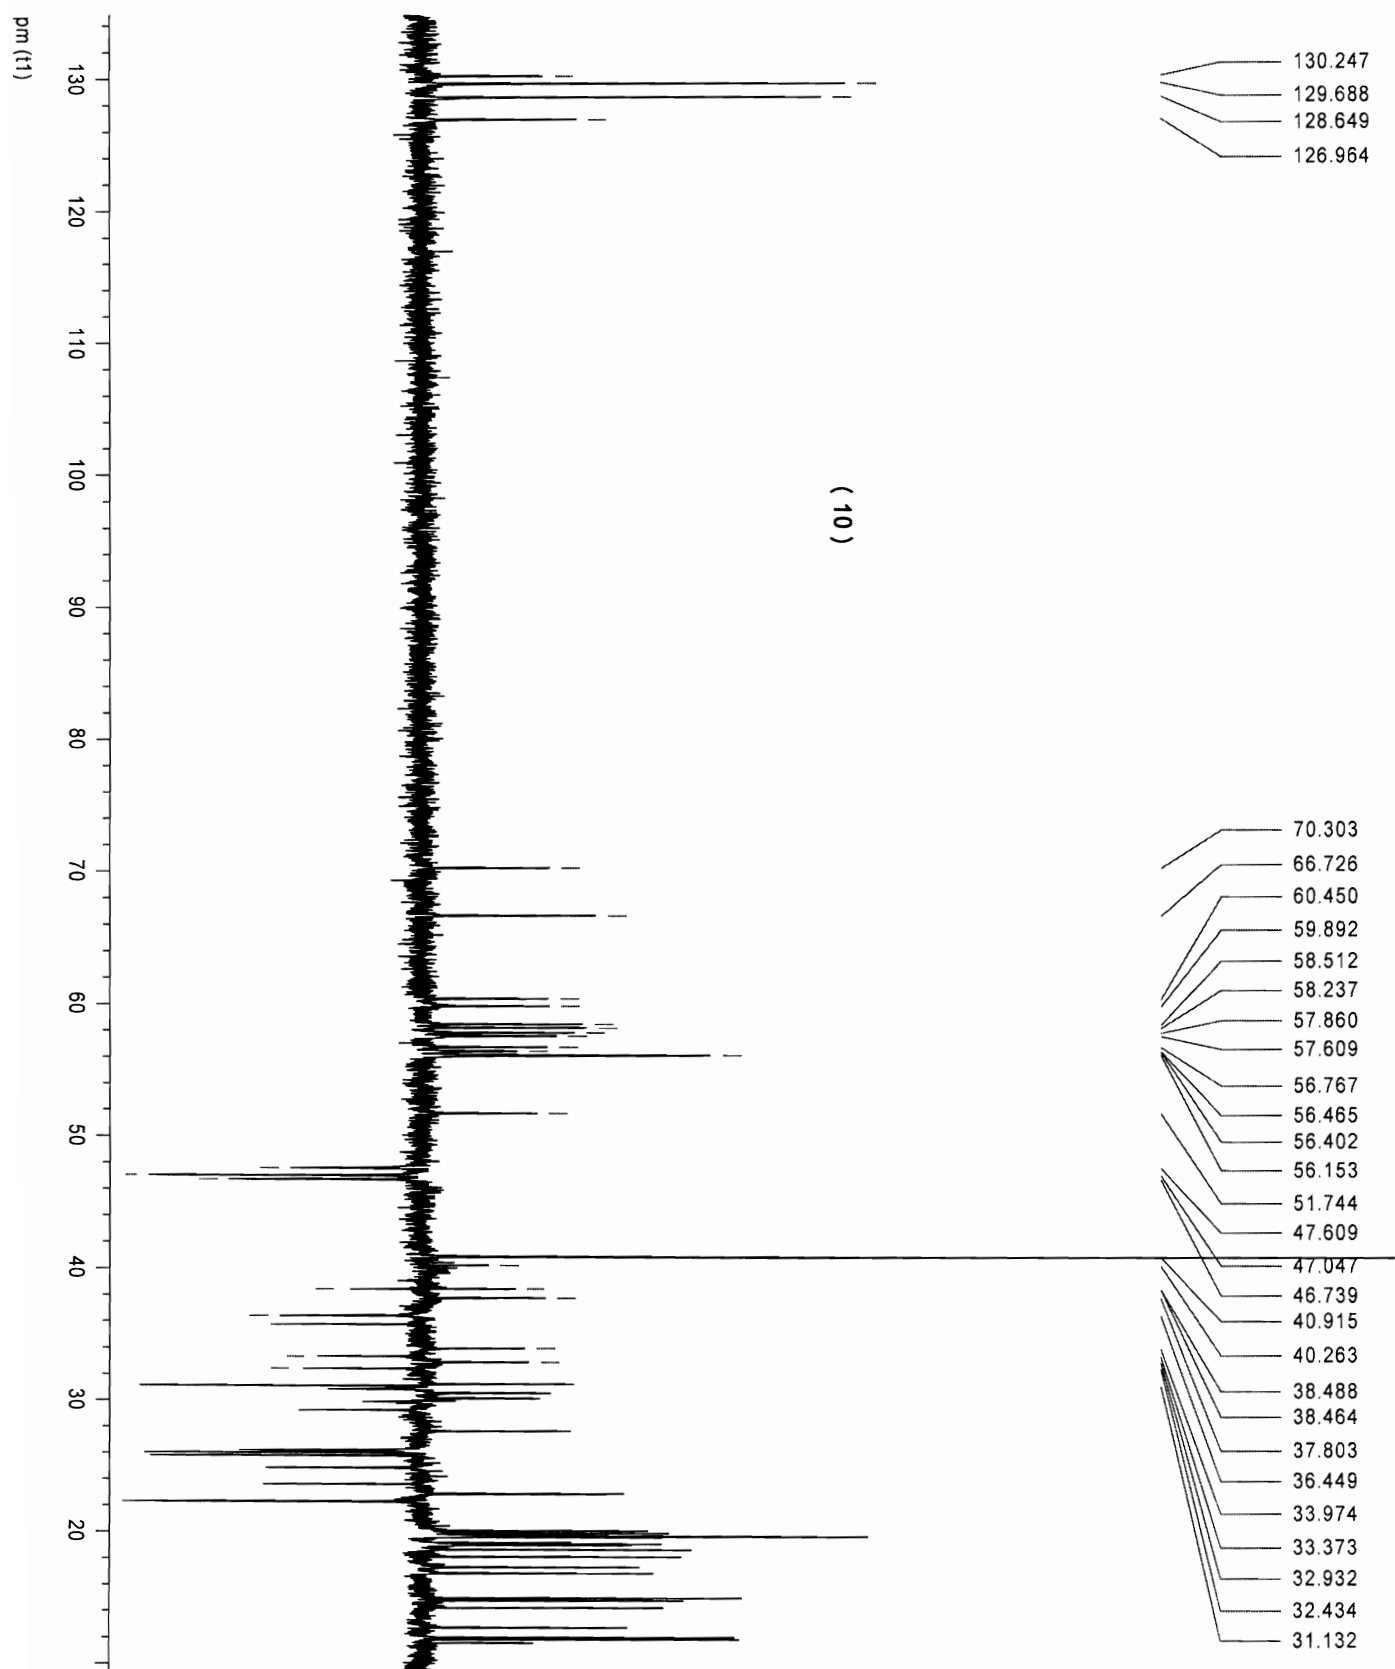





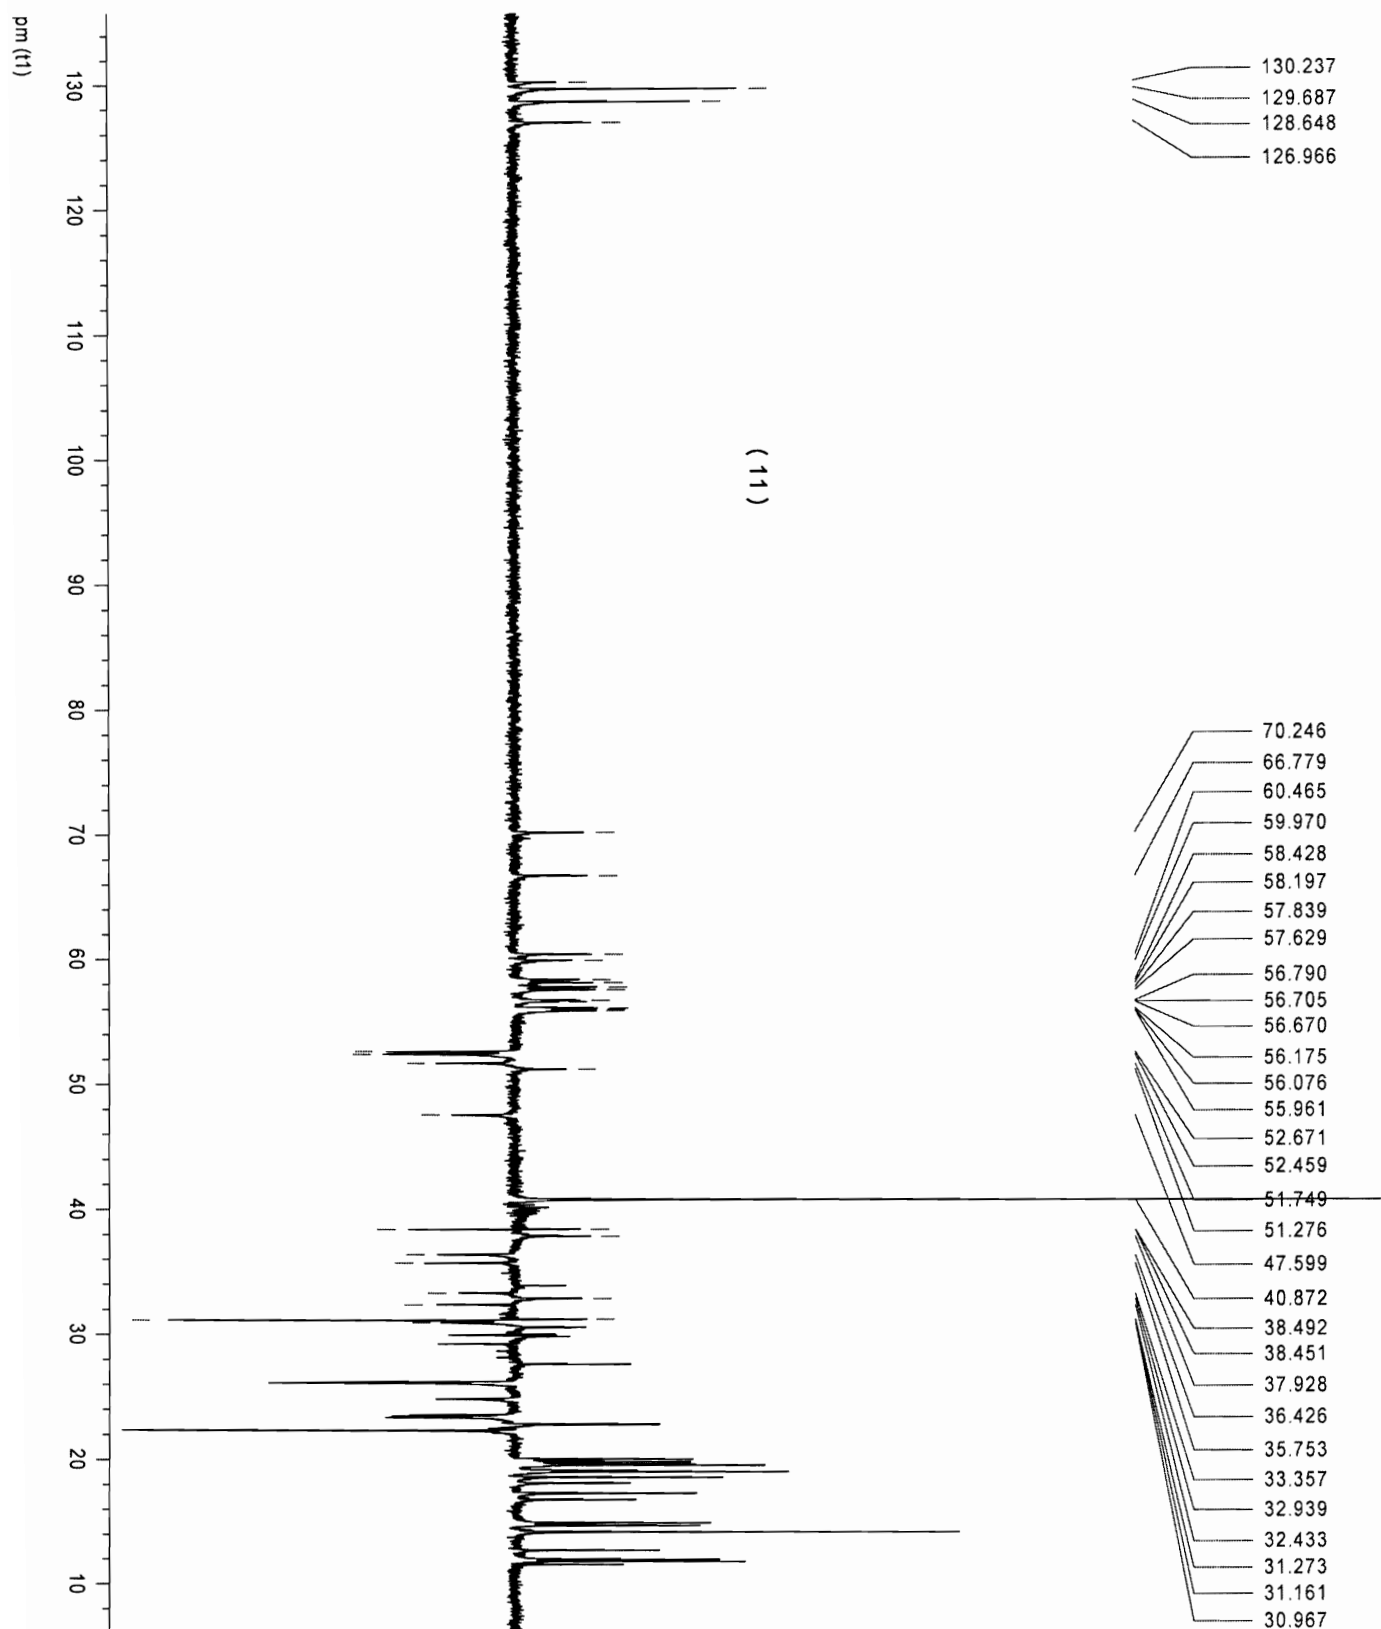



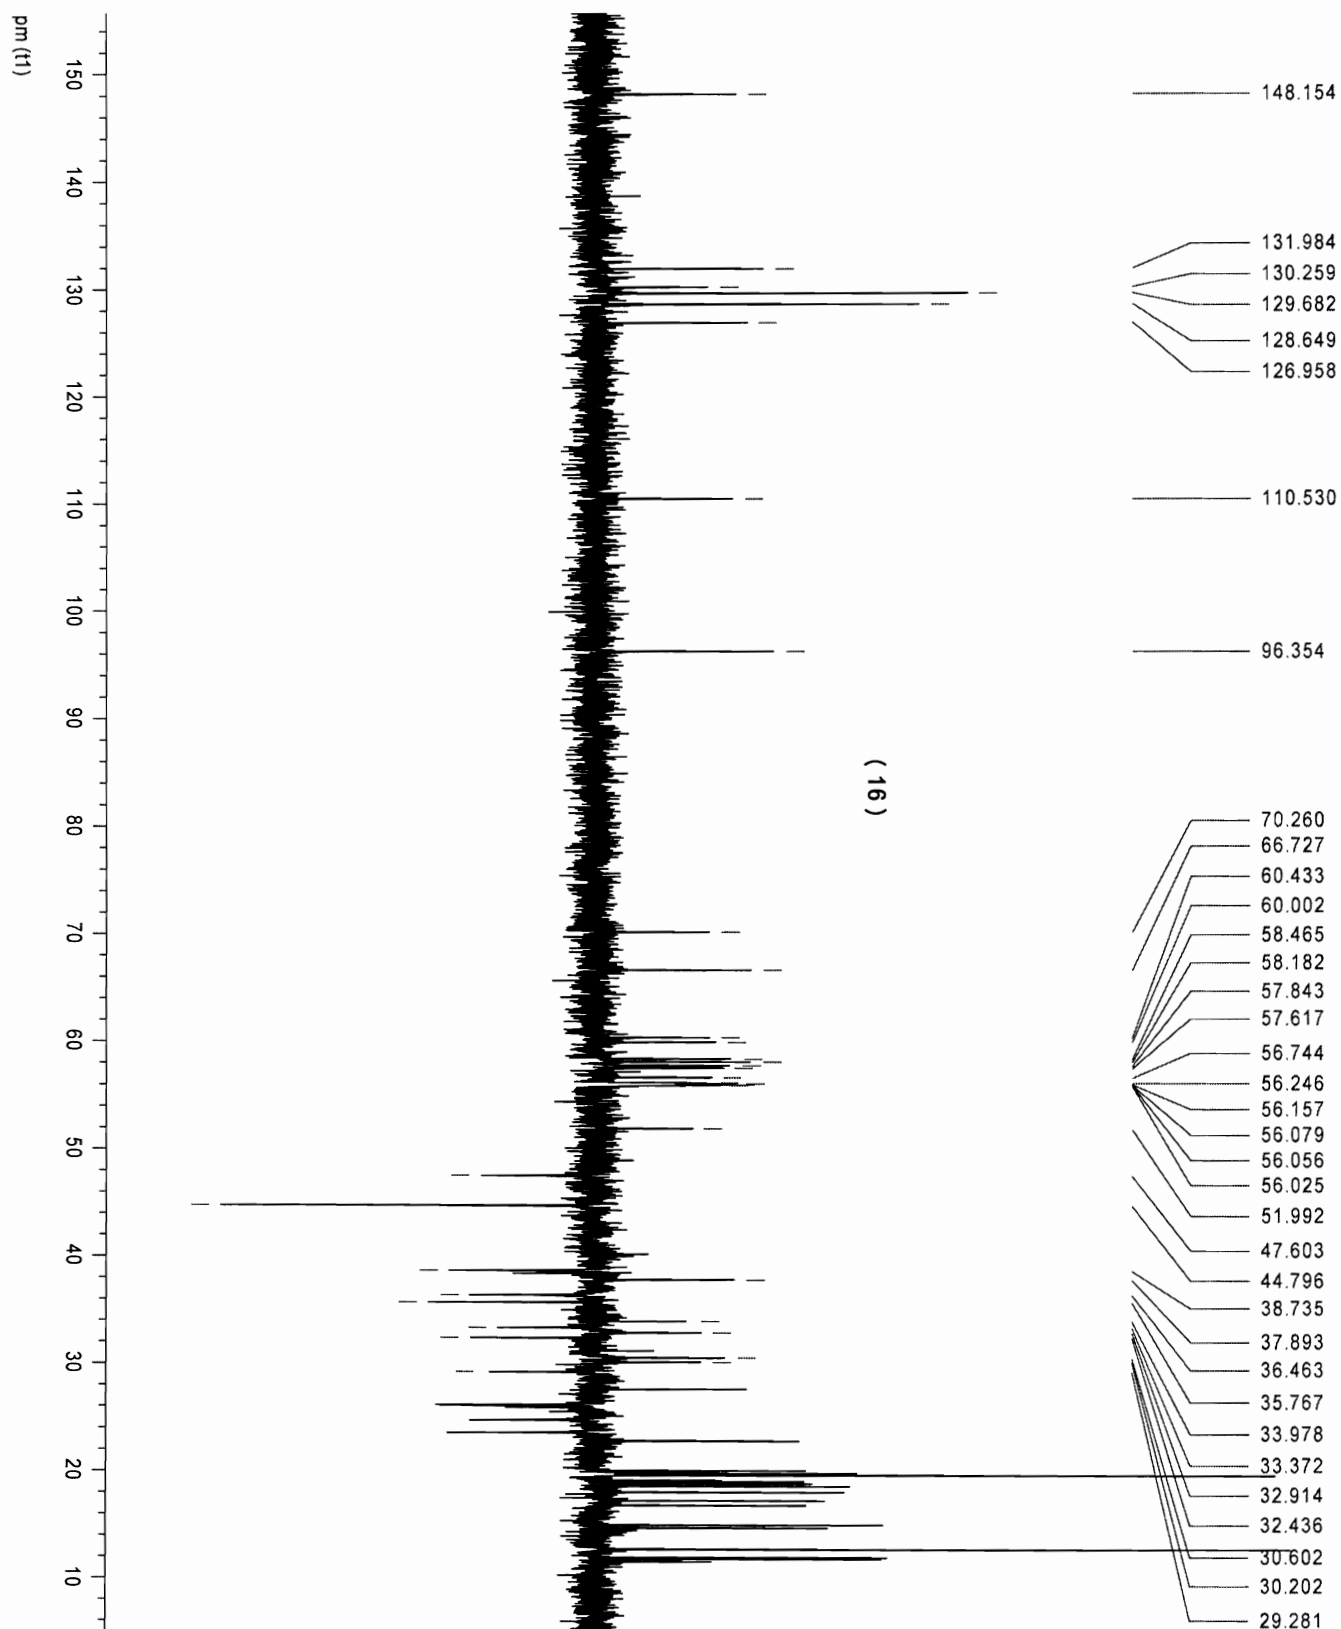

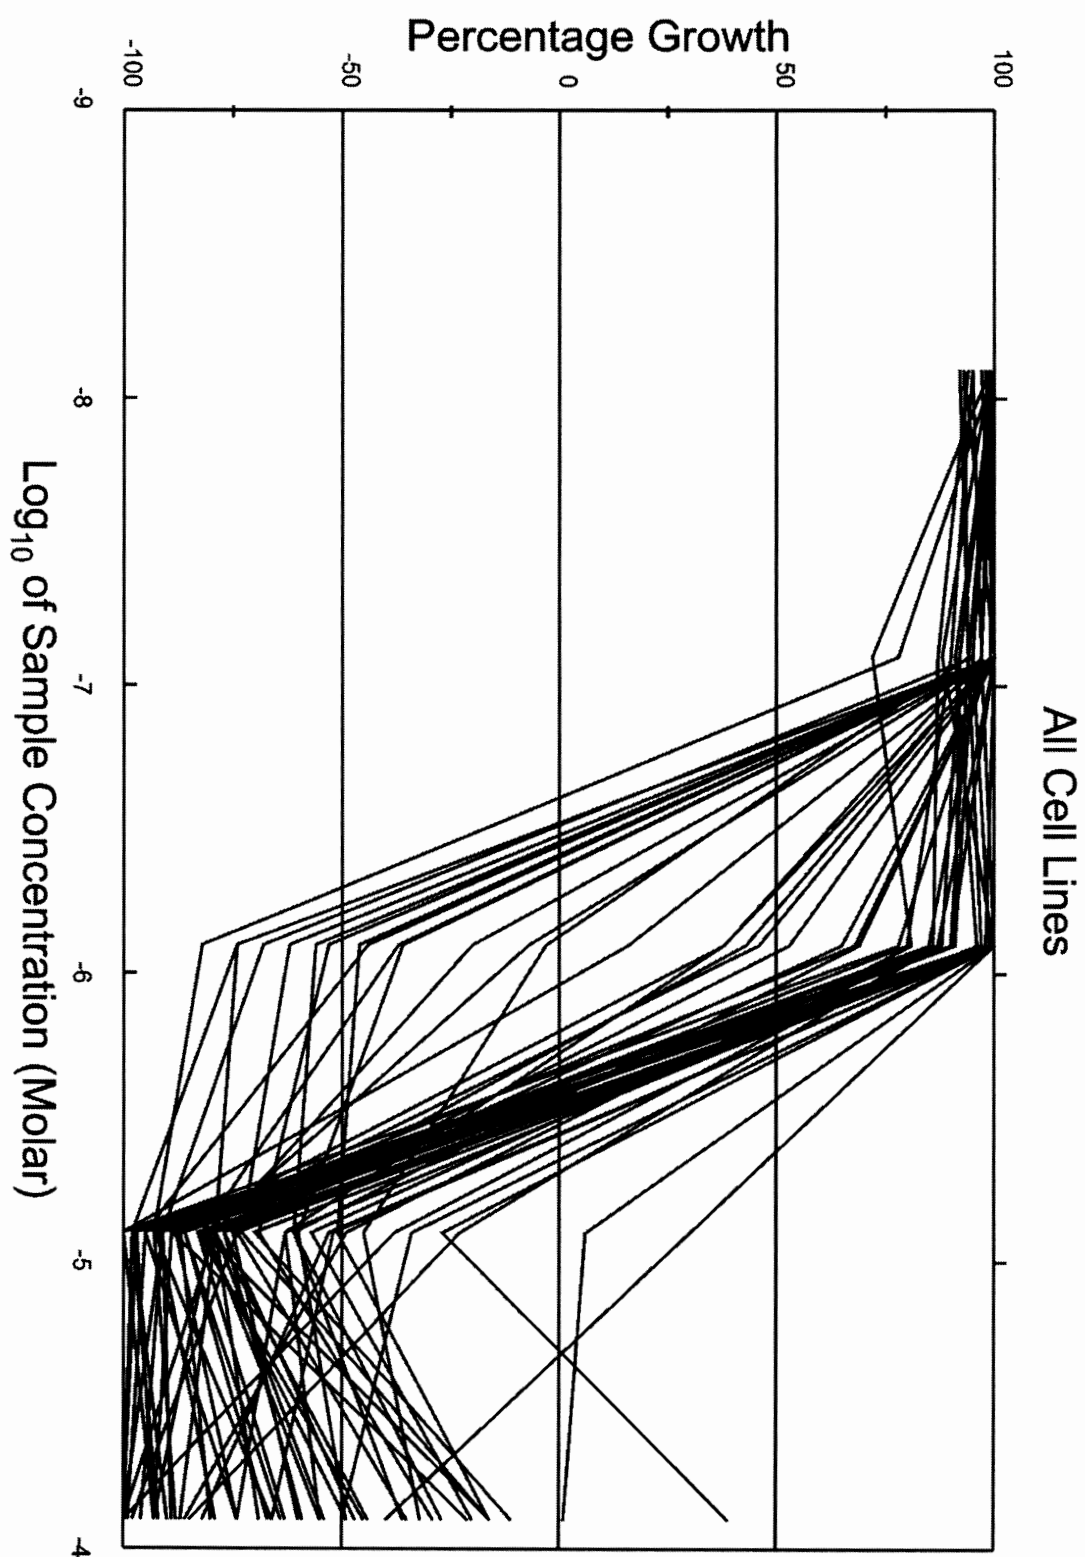

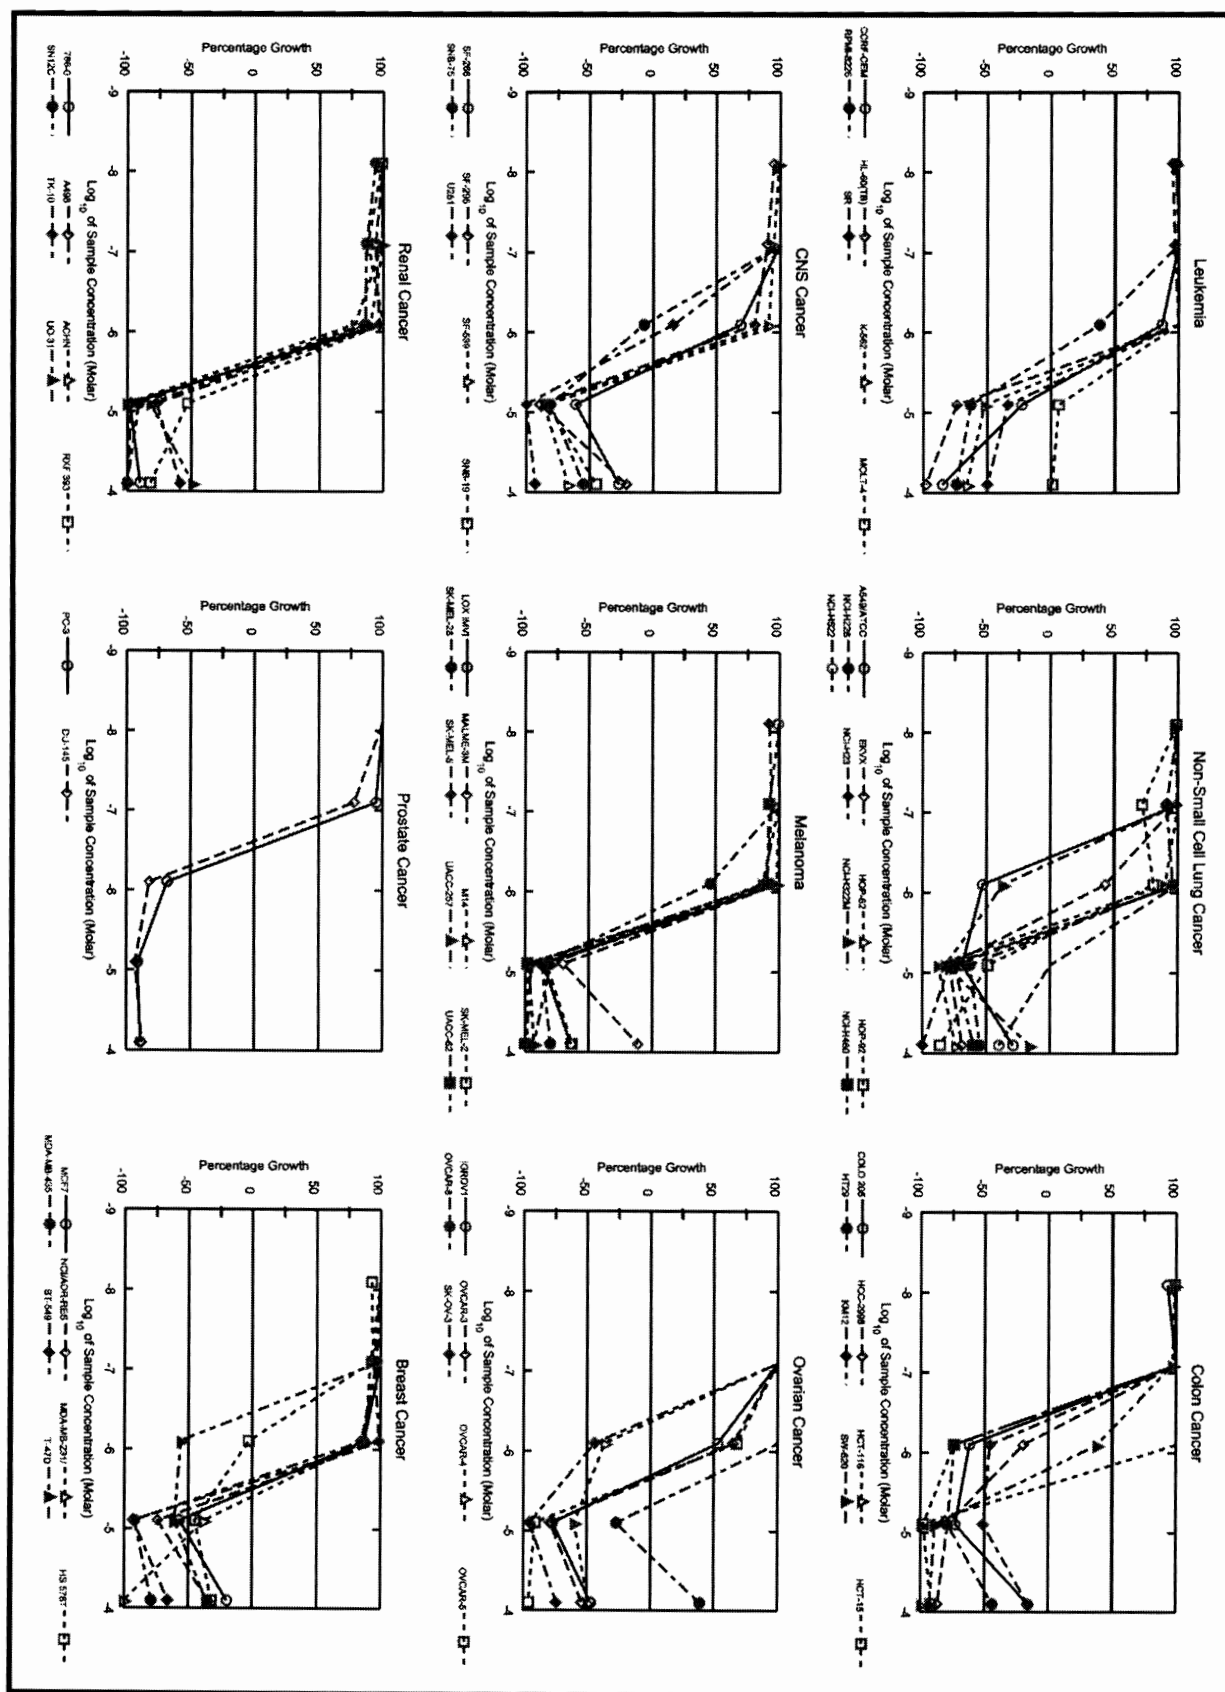

| Panel/Cell Line | Time | Ctrl | -8.1 | -7.1 | Mean Optical Densities |      |      |      |      | Log10 Concentration |      |      |      |      | Percent Growth |      |  |  |  | GI50 | TGI | LC50 |  |  |  |  |  |  |  |  |  |  |  |  |  |  |  |  |  |  |  |  |  |  |  |  |  |  |  |  |  |  |  |  |  |  |  |  |  |  |  |  |  |  |  |  |  |  |  |  |  |  |  |  |  |  |  |  |  |  |  |  |  |  |  |  |  |  |  |  |  |  |  |  |  |  |  |  |  |  |  |  |  |  |  |  |  |  |  |  |  |  |  |  |  |  |  |  |  |  |  |  |  |  |  |  |  |  |  |  |  |  |  |  |  |  |  |  |  |  |  |  |  |  |  |  |  |  |  |  |  |  |  |  |  |  |  |  |  |  |  |  |  |  |  |  |  |  |  |  |  |  |  |  |  |  |  |  |  |  |  |  |  |  |  |  |  |  |  |  |  |  |  |  |  |  |  |  |  |  |  |  |  |  |  |  |  |  |  |  |  |  |  |  |  |  |  |  |  |  |  |  |  |  |  |  |  |  |  |  |  |  |  |  |  |  |  |  |  |  |  |  |  |  |  |  |  |  |  |  |  |  |  |  |  |  |  |  |  |  |  |  |  |  |  |  |  |  |  |  |  |  |  |  |  |  |  |  |  |  |  |  |  |  |  |  |  |  |  |  |  |  |  |  |  |  |  |  |  |  |  |  |  |  |  |  |  |  |  |  |  |  |  |  |  |  |  |  |  |  |  |  |  |  |  |  |  |  |  |  |  |  |  |  |  |  |  |  |  |  |  |  |  |  |  |  |  |  |  |  |  |  |  |  |  |  |  |  |  |  |  |  |  |  |  |  |  |  |  |  |  |  |  |  |  |  |  |  |  |  |  |  |  |  |  |  |  |  |  |  |  |  |  |  |  |  |  |  |  |  |  |  |  |  |  |  |  |  |  |  |  |  |  |  |  |  |  |  |  |  |  |  |  |  |  |  |  |  |  |  |  |  |  |  |  |  |  |  |  |  |  |  |  |  |  |  |  |  |  |  |  |  |  |  |  |  |  |  |  |  |  |  |  |  |  |  |  |  |  |  |  |  |  |  |  |  |  |  |  |  |  |  |  |  |  |  |  |  |  |  |  |  |  |  |  |  |  |  |  |  |  |  |  |  |  |  |  |  |  |  |  |  |  |  |  |  |  |  |  |  |  |  |  |  |  |  |  |  |  |  |  |  |  |  |  |  |  |  |  |  |  |  |  |  |  |  |  |  |  |  |  |  |  |  |  |  |  |  |  |  |  |  |  |  |  |  |  |  |  |  |  |  |  |  |  |  |  |  |  |  |  |  |  |  |  |  |  |  |  |  |  |  |  |  |  |  |  |  |  |  |  |  |  |  |  |  |  |  |  |  |  |  |  |  |  |  |  |  |  |  |  |  |  |  |  |  |  |  |  |  |  |  |  |  |  |  |  |  |  |  |  |  |  |  |  |  |  |  |  |  |  |  |  |  |  |  |  |  |  |  |  |  |  |  |  |  |  |  |  |  |  |  |  |  |  |  |  |  |  |  |  |  |  |  |  |  |  |  |  |  |  |  |  |  |  |  |  |  |  |  |  |  |  |  |  |  |  |  |  |  |  |  |  |  |  |  |  |  |  |  |  |  |  |  |  |  |  |  |  |  |  |  |  |  |  |  |  |  |  |  |  |  |  |  |  |  |  |  |  |  |  |  |  |  |  |  |  |  |  |  |  |  |  |  |  |  |  |  |  |  |  |  |  |  |  |  |  |  |  |  |  |  |  |  |  |  |  |  |  |  |  |  |  |  |  |  |  |  |  |  |  |  |  |  |  |  |  |  |  |  |  |  |  |  |  |  |  |  |  |  |  |  |  |  |  |  |  |  |  |  |  |  |  |  |  |  |  |  |  |  |  |  |  |  |  |  |  |  |  |  |  |  |  |  |  |  |  |  |  |  |  |  |  |  |  |  |  |  |  |  |  |  |  |  |  |  |  |  |  |  |  |  |  |  |  |  |  |  |  |  |  |  |  |  |  |  |  |  |  |  |  |  |  |  |  |  |  |  |  |  |  |  |  |  |  |  |  |  |  |  |  |  |  |  |  |  |  |  |  |  |  |  |  |  |  |  |  |  |  |  |  |  |  |  |  |  |  |  |  |  |  |  |  |  |  |  |  |  |  |  |  |  |  |  |  |  |  |  |  |  |  |  |  |  |  |  |  |  |  |  |  |  |  |  |  |  |  |  |  |  |  |  |  |  |  |  |  |  |  |  |  |  |  |  |  |  |  |  |  |  |  |  |  |  |  |  |  |  |  |  |  |  |  |  |  |  |  |  |  |  |  |  |  |  |  |  |  |  |  |  |  |  |  |  |  |  |  |  |  |  |  |  |  |  |  |  |  |  |  |  |  |  |  |  |  |  |  |  |  |  |  |  |  |  |  |  |  |  |  |  |  |  |  |  |  |  |  |  |  |  |  |  |  |  |  |  |  |  |  |  |  |  |  |  |  |  |  |  |  |  |  |  |  |  |  |  |  |  |  |  |  |  |  |  |  |  |  |  |  |  |  |  |  |  |  |  |  |  |  |  |  |  |  |  |  |  |  |  |  |  |  |  |  |  |  |  |  |  |  |  |  |  |  |  |  |  |  |  |  |  |  |  |  |  |  |  |  |  |  |  |  |  |  |  |  |  |  |  |  |  |  |  |  |  |  |  |  |  |  |  |  |  |  |  |  |  |  |  |  |  |  |  |  |  |  |  |  |  |  |  |  |  |  |  |  |  |  |  |  |  |  |  |  |  |  |  |  |  |  |  |  |  |  |  |  |  |  |  |  |  |  |  |  |  |  |  |  |  |  |  |  |  |  |  |  |  |  |  |  |  |  |  |  |  |  |  |  |  |  |  |  |  |  |  |  |  |  |  |  |  |  |  |  |  |  |  |  |  |  |  |  |  |  |  |  |  |  |  |  |  |  |  |  |  |  |  |  |  |  |  |  |  |  |  |  |  |  |  |  |  |  |  |  |  |  |  |  |  |  |  |  |  |  |  |  |  |  |  |  |  |  |  |  |  |  |  |  |  |  |  |  |  |  |  |  |  |  |  |  |  |  |  |  |  |  |  |  |  |  |  |  |  |  |  |  |  |  |  |  |  |  |  |  |  |  |  |  |  |  |  |  |  |  |  |  |  |  |  |  |  |  |  |  |  |  |  |  |  |  |  |  |  |  |  |  |  |  |  |  |  |  |  |  |  |  |  |  |  |  |  |  |  |  |  |  |  |  |  |  |  |  |  |  |  |  |  |  |  |  |  |  |  |  |  |  |  |  |  |  |  |  |  |  |  |  |  |  |  |  |  |  |  |  |  |  |  |  |  |  |  |  |  |  |  |  |  |  |  |  |  |  |  |  |  |  |  |  |  |  |  |  |  |  |  |  |  |  |  |  |  |  |  |  |  |  |  |  |  |  |  |  |  |  |  |  |  |  |  |  |  |
|-----------------|------|------|------|------|------------------------|------|------|------|------|---------------------|------|------|------|------|----------------|------|--|--|--|------|-----|------|--|--|--|--|--|--|--|--|--|--|--|--|--|--|--|--|--|--|--|--|--|--|--|--|--|--|--|--|--|--|--|--|--|--|--|--|--|--|--|--|--|--|--|--|--|--|--|--|--|--|--|--|--|--|--|--|--|--|--|--|--|--|--|--|--|--|--|--|--|--|--|--|--|--|--|--|--|--|--|--|--|--|--|--|--|--|--|--|--|--|--|--|--|--|--|--|--|--|--|--|--|--|--|--|--|--|--|--|--|--|--|--|--|--|--|--|--|--|--|--|--|--|--|--|--|--|--|--|--|--|--|--|--|--|--|--|--|--|--|--|--|--|--|--|--|--|--|--|--|--|--|--|--|--|--|--|--|--|--|--|--|--|--|--|--|--|--|--|--|--|--|--|--|--|--|--|--|--|--|--|--|--|--|--|--|--|--|--|--|--|--|--|--|--|--|--|--|--|--|--|--|--|--|--|--|--|--|--|--|--|--|--|--|--|--|--|--|--|--|--|--|--|--|--|--|--|--|--|--|--|--|--|--|--|--|--|--|--|--|--|--|--|--|--|--|--|--|--|--|--|--|--|--|--|--|--|--|--|--|--|--|--|--|--|--|--|--|--|--|--|--|--|--|--|--|--|--|--|--|--|--|--|--|--|--|--|--|--|--|--|--|--|--|--|--|--|--|--|--|--|--|--|--|--|--|--|--|--|--|--|--|--|--|--|--|--|--|--|--|--|--|--|--|--|--|--|--|--|--|--|--|--|--|--|--|--|--|--|--|--|--|--|--|--|--|--|--|--|--|--|--|--|--|--|--|--|--|--|--|--|--|--|--|--|--|--|--|--|--|--|--|--|--|--|--|--|--|--|--|--|--|--|--|--|--|--|--|--|--|--|--|--|--|--|--|--|--|--|--|--|--|--|--|--|--|--|--|--|--|--|--|--|--|--|--|--|--|--|--|--|--|--|--|--|--|--|--|--|--|--|--|--|--|--|--|--|--|--|--|--|--|--|--|--|--|--|--|--|--|--|--|--|--|--|--|--|--|--|--|--|--|--|--|--|--|--|--|--|--|--|--|--|--|--|--|--|--|--|--|--|--|--|--|--|--|--|--|--|--|--|--|--|--|--|--|--|--|--|--|--|--|--|--|--|--|--|--|--|--|--|--|--|--|--|--|--|--|--|--|--|--|--|--|--|--|--|--|--|--|--|--|--|--|--|--|--|--|--|--|--|--|--|--|--|--|--|--|--|--|--|--|--|--|--|--|--|--|--|--|--|--|--|--|--|--|--|--|--|--|--|--|--|--|--|--|--|--|--|--|--|--|--|--|--|--|--|--|--|--|--|--|--|--|--|--|--|--|--|--|--|--|--|--|--|--|--|--|--|--|--|--|--|--|--|--|--|--|--|--|--|--|--|--|--|--|--|--|--|--|--|--|--|--|--|--|--|--|--|--|--|--|--|--|--|--|--|--|--|--|--|--|--|--|--|--|--|--|--|--|--|--|--|--|--|--|--|--|--|--|--|--|--|--|--|--|--|--|--|--|--|--|--|--|--|--|--|--|--|--|--|--|--|--|--|--|--|--|--|--|--|--|--|--|--|--|--|--|--|--|--|--|--|--|--|--|--|--|--|--|--|--|--|--|--|--|--|--|--|--|--|--|--|--|--|--|--|--|--|--|--|--|--|--|--|--|--|--|--|--|--|--|--|--|--|--|--|--|--|--|--|--|--|--|--|--|--|--|--|--|--|--|--|--|--|--|--|--|--|--|--|--|--|--|--|--|--|--|--|--|--|--|--|--|--|--|--|--|--|--|--|--|--|--|--|--|--|--|--|--|--|--|--|--|--|--|--|--|--|--|--|--|--|--|--|--|--|--|--|--|--|--|--|--|--|--|--|--|--|--|--|--|--|--|--|--|--|--|--|--|--|--|--|--|--|--|--|--|--|--|--|--|--|--|--|--|--|--|--|--|--|--|--|--|--|--|--|--|--|--|--|--|--|--|--|--|--|--|--|--|--|--|--|--|--|--|--|--|--|--|--|--|--|--|--|--|--|--|--|--|--|--|--|--|--|--|--|--|--|--|--|--|--|--|--|--|--|--|--|--|--|--|--|--|--|--|--|--|--|--|--|--|--|--|--|--|--|--|--|--|--|--|--|--|--|--|--|--|--|--|--|--|--|--|--|--|--|--|--|--|--|--|--|--|--|--|--|--|--|--|--|--|--|--|--|--|--|--|--|--|--|--|--|--|--|--|--|--|--|--|--|--|--|--|--|--|--|--|--|--|--|--|--|--|--|--|--|--|--|--|--|--|--|--|--|--|--|--|--|--|--|--|--|--|--|--|--|--|--|--|--|--|--|--|--|--|--|--|--|--|--|--|--|--|--|--|--|--|--|--|--|--|--|--|--|--|--|--|--|--|--|--|--|--|--|--|--|--|--|--|--|--|--|--|--|--|--|--|--|--|--|--|--|--|--|--|--|--|--|--|--|--|--|--|--|--|--|--|--|--|--|--|--|--|--|--|--|--|--|--|--|--|--|--|--|--|--|--|--|--|--|--|--|--|--|--|--|--|--|--|--|--|--|--|--|--|--|--|--|--|--|--|--|--|--|--|--|--|--|--|--|--|--|--|--|--|--|--|--|--|--|--|--|--|--|--|--|--|--|--|--|--|--|--|--|--|--|--|--|--|--|--|--|--|--|--|--|--|--|--|--|--|--|--|--|--|--|--|--|--|--|--|--|--|--|--|--|--|--|--|--|--|--|--|--|--|--|--|--|--|--|--|--|--|--|--|--|--|--|--|--|--|--|--|--|--|--|--|--|--|--|--|--|--|--|--|--|--|--|--|--|--|--|--|--|--|--|--|--|--|--|--|--|--|--|--|--|--|--|--|--|--|--|--|--|--|--|--|--|--|--|--|--|--|--|--|--|--|--|--|--|--|--|--|--|--|--|--|--|--|--|--|--|--|--|--|--|--|--|--|--|--|--|--|--|--|--|--|--|--|--|--|--|--|--|--|--|--|--|--|--|--|--|--|--|--|--|--|--|--|--|--|--|--|--|--|--|--|--|--|--|--|--|--|--|--|--|--|--|--|--|--|--|--|--|--|--|--|--|--|--|--|--|--|--|--|--|--|--|--|--|--|--|--|--|--|--|--|--|--|--|--|--|--|--|--|--|--|--|--|--|--|--|--|--|--|--|--|--|--|--|--|--|--|--|--|--|--|--|--|--|--|--|--|--|--|--|--|--|--|--|--|--|--|--|--|--|--|--|--|--|--|--|--|--|--|--|--|--|--|--|--|--|--|--|--|--|--|--|--|--|--|--|--|--|--|--|--|--|--|--|--|--|--|--|--|--|--|--|--|--|--|--|--|--|--|--|--|--|--|--|--|--|--|--|--|--|--|--|--|--|--|--|--|--|--|--|--|--|
|                 |      |      |      |      | -6.1                   | -5.1 | -4.1 | -3.1 | -2.1 | -6.1                | -5.1 | -4.1 | -3.1 | -2.1 | -1.1           | -0.1 |  |  |  |      |     |      |  |  |  |  |  |  |  |  |  |  |  |  |  |  |  |  |  |  |  |  |  |  |  |  |  |  |  |  |  |  |  |  |  |  |  |  |  |  |  |  |  |  |  |  |  |  |  |  |  |  |  |  |  |  |  |  |  |  |  |  |  |  |  |  |  |  |  |  |  |  |  |  |  |  |  |  |  |  |  |  |  |  |  |  |  |  |  |  |  |  |  |  |  |  |  |  |  |  |  |  |  |  |  |  |  |  |  |  |  |  |  |  |  |  |  |  |  |  |  |  |  |  |  |  |  |  |  |  |  |  |  |  |  |  |  |  |  |  |  |  |  |  |  |  |  |  |  |  |  |  |  |  |  |  |  |  |  |  |  |  |  |  |  |  |  |  |  |  |  |  |  |  |  |  |  |  |  |  |  |  |  |  |  |  |  |  |  |  |  |  |  |  |  |  |  |  |  |  |  |  |  |  |  |  |  |  |  |  |  |  |  |  |  |  |  |  |  |  |  |  |  |  |  |  |  |  |  |  |  |  |  |  |  |  |  |  |  |  |  |  |  |  |  |  |  |  |  |  |  |  |  |  |  |  |  |  |  |  |  |  |  |  |  |  |  |  |  |  |  |  |  |  |  |  |  |  |  |  |  |  |  |  |  |  |  |  |  |  |  |  |  |  |  |  |  |  |  |  |  |  |  |  |  |  |  |  |  |  |  |  |  |  |  |  |  |  |  |  |  |  |  |  |  |  |  |  |  |  |  |  |  |  |  |  |  |  |  |  |  |  |  |  |  |  |  |  |  |  |  |  |  |  |  |  |  |  |  |  |  |  |  |  |  |  |  |  |  |  |  |  |  |  |  |  |  |  |  |  |  |  |  |  |  |  |  |  |  |  |  |  |  |  |  |  |  |  |  |  |  |  |  |  |  |  |  |  |  |  |  |  |  |  |  |  |  |  |  |  |  |  |  |  |  |  |  |  |  |  |  |  |  |  |  |  |  |  |  |  |  |  |  |  |  |  |  |  |  |  |  |  |  |  |  |  |  |  |  |  |  |  |  |  |  |  |  |  |  |  |  |  |  |  |  |  |  |  |  |  |  |  |  |  |  |  |  |  |  |  |  |  |  |  |  |  |  |  |  |  |  |  |  |  |  |  |  |  |  |  |  |  |  |  |  |  |  |  |  |  |  |  |  |  |  |  |  |  |  |  |  |  |  |  |  |  |  |  |  |  |  |  |  |  |  |  |  |  |  |  |  |  |  |  |  |  |  |  |  |  |  |  |  |  |  |  |  |  |  |  |  |  |  |  |  |  |  |  |  |  |  |  |  |  |  |  |  |  |  |  |  |  |  |  |  |  |  |  |  |  |  |  |  |  |  |  |  |  |  |  |  |  |  |  |  |  |  |  |  |  |  |  |  |  |  |  |  |  |  |  |  |  |  |  |  |  |  |  |  |  |  |  |  |  |  |  |  |  |  |  |  |  |  |  |  |  |  |  |  |  |  |  |  |  |  |  |  |  |  |  |  |  |  |  |  |  |  |  |  |  |  |  |  |  |  |  |  |  |  |  |  |  |  |  |  |  |  |  |  |  |  |  |  |  |  |  |  |  |  |  |  |  |  |  |  |  |  |  |  |  |  |  |  |  |  |  |  |  |  |  |  |  |  |  |  |  |  |  |  |  |  |  |  |  |  |  |  |  |  |  |  |  |  |  |  |  |  |  |  |  |  |  |  |  |  |  |  |  |  |  |  |  |  |  |  |  |  |  |  |  |  |  |  |  |  |  |  |  |  |  |  |  |  |  |  |  |  |  |  |  |  |  |  |  |  |  |  |  |  |  |  |  |  |  |  |  |  |  |  |  |  |  |  |  |  |  |  |  |  |  |  |  |  |  |  |  |  |  |  |  |  |  |  |  |  |  |  |  |  |  |  |  |  |  |  |  |  |  |  |  |  |  |  |  |  |  |  |  |  |  |  |  |  |  |  |  |  |  |  |  |  |  |  |  |  |  |  |  |  |  |  |  |  |  |  |  |  |  |  |  |  |  |  |  |  |  |  |  |  |  |  |  |  |  |  |  |  |  |  |  |  |  |  |  |  |  |  |  |  |  |  |  |  |  |  |  |  |  |  |  |  |  |  |  |  |  |  |  |  |  |  |  |  |  |  |  |  |  |  |  |  |  |  |  |  |  |  |  |  |  |  |  |  |  |  |  |  |  |  |  |  |  |  |  |  |  |  |  |  |  |  |  |  |  |  |  |  |  |  |  |  |  |  |  |  |  |  |  |  |  |  |  |  |  |  |  |  |  |  |  |  |  |  |  |  |  |  |  |  |  |  |  |  |  |  |  |  |  |  |  |  |  |  |  |  |  |  |  |  |  |  |  |  |  |  |  |  |  |  |  |  |  |  |  |  |  |  |  |  |  |  |  |  |  |  |  |  |  |  |  |  |  |  |  |  |  |  |  |  |  |  |  |  |  |  |  |  |  |  |  |  |  |  |  |  |  |  |  |  |  |  |  |  |  |  |  |  |  |  |  |  |  |  |  |  |  |  |  |  |  |  |  |  |  |  |  |  |  |  |  |  |  |  |  |  |  |  |  |  |  |  |  |  |  |  |  |  |  |  |  |  |  |  |  |  |  |  |  |  |  |  |  |  |  |  |  |  |  |  |  |  |  |  |  |  |  |  |  |  |  |  |  |  |  |  |  |  |  |  |  |  |  |  |  |  |  |  |  |  |  |  |  |  |  |  |  |  |  |  |  |  |  |  |  |  |  |  |  |  |  |  |  |  |  |  |  |  |  |  |  |  |  |  |  |  |  |  |  |  |  |  |  |  |  |  |  |  |  |  |  |  |  |  |  |  |  |  |  |  |  |  |  |  |  |  |  |  |  |  |  |  |  |  |  |  |  |  |  |  |  |  |  |  |  |  |  |  |  |  |  |  |  |  |  |  |  |  |  |  |  |  |  |  |  |  |  |  |  |  |  |  |  |  |  |  |  |  |  |  |  |  |  |  |  |  |  |  |  |  |  |  |  |  |  |  |  |  |  |  |  |  |  |  |  |  |  |  |  |  |  |  |  |  |  |  |  |  |  |  |  |  |  |  |  |  |  |  |  |  |  |  |  |  |  |  |  |  |  |  |  |  |  |  |  |  |  |  |  |  |  |  |  |  |  |  |  |  |  |  |  |  |  |  |  |  |  |  |  |  |  |  |  |  |  |  |  |  |  |  |  |  |  |  |  |  |  |  |  |  |  |  |  |  |  |  |  |  |  |  |  |  |  |  |  |  |  |  |  |  |  |  |  |  |  |  |  |  |  |  |  |  |  |  |  |  |  |  |  |  |  |  |  |  |  |  |  |  |  |  |  |  |  |  |  |  |  |  |  |  |  |  |  |  |  |  |  |  |  |  |  |  |  |  |  |  |  |  |  |  |  |
| Leukemia        | Zero |      |      |      |                        |      |      |      |      |                     |      |      |      |      |                |      |  |  |  |      |     |      |  |  |  |  |  |  |  |  |  |  |  |  |  |  |  |  |  |  |  |  |  |  |  |  |  |  |  |  |  |  |  |  |  |  |  |  |  |  |  |  |  |  |  |  |  |  |  |  |  |  |  |  |  |  |  |  |  |  |  |  |  |  |  |  |  |  |  |  |  |  |  |  |  |  |  |  |  |  |  |  |  |  |  |  |  |  |  |  |  |  |  |  |  |  |  |  |  |  |  |  |  |  |  |  |  |  |  |  |  |  |  |  |  |  |  |  |  |  |  |  |  |  |  |  |  |  |  |  |  |  |  |  |  |  |  |  |  |  |  |  |  |  |  |  |  |  |  |  |  |  |  |  |  |  |  |  |  |  |  |  |  |  |  |  |  |  |  |  |  |  |  |  |  |  |  |  |  |  |  |  |  |  |  |  |  |  |  |  |  |  |  |  |  |  |  |  |  |  |  |  |  |  |  |  |  |  |  |  |  |  |  |  |  |  |  |  |  |  |  |  |  |  |  |  |  |  |  |  |  |  |  |  |  |  |  |  |  |  |  |  |  |  |  |  |  |  |  |  |  |  |  |  |  |  |  |  |  |  |  |  |  |  |  |  |  |  |  |  |  |  |  |  |  |  |  |  |  |  |  |  |  |  |  |  |  |  |  |  |  |  |  |  |  |  |  |  |  |  |  |  |  |  |  |  |  |  |  |  |  |  |  |  |  |  |  |  |  |  |  |  |  |  |  |  |  |  |  |  |  |  |  |  |  |  |  |  |  |  |  |  |  |  |  |  |  |  |  |  |  |  |  |  |  |  |  |  |  |  |  |  |  |  |  |  |  |  |  |  |  |  |  |  |  |  |  |  |  |  |  |  |  |  |  |  |  |  |  |  |  |  |  |  |  |  |  |  |  |  |  |  |  |  |  |  |  |  |  |  |  |  |  |  |  |  |  |  |  |  |  |  |  |  |  |  |  |  |  |  |  |  |  |  |  |  |  |  |  |  |  |  |  |  |  |  |  |  |  |  |  |  |  |  |  |  |  |  |  |  |  |  |  |  |  |  |  |  |  |  |  |  |  |  |  |  |  |  |  |  |  |  |  |  |  |  |  |  |  |  |  |  |  |  |  |  |  |  |  |  |  |  |  |  |  |  |  |  |  |  |  |  |  |  |  |  |  |  |  |  |  |  |  |  |  |  |  |  |  |  |  |  |  |  |  |  |  |  |  |  |  |  |  |  |  |  |  |  |  |  |  |  |  |  |  |  |  |  |  |  |  |  |  |  |  |  |  |  |  |  |  |  |  |  |  |  |  |  |  |  |  |  |  |  |  |  |  |  |  |  |  |  |  |  |  |  |  |  |  |  |  |  |  |  |  |  |  |  |  |  |  |  |  |  |  |  |  |  |  |  |  |  |  |  |  |  |  |  |  |  |  |  |  |  |  |  |  |  |  |  |  |  |  |  |  |  |  |  |  |  |  |  |  |  |  |  |  |  |  |  |  |  |  |  |  |  |  |  |  |  |  |  |  |  |  |  |  |  |  |  |  |  |  |  |  |  |  |  |  |  |  |  |  |  |  |  |  |  |  |  |  |  |  |  |  |  |  |  |  |  |  |  |  |  |  |  |  |  |  |  |  |  |  |  |  |  |  |  |  |  |  |  |  |  |  |  |  |  |  |  |  |  |  |  |  |  |  |  |  |  |  |  |  |  |  |  |  |  |  |  |  |  |  |  |  |  |  |  |  |  |  |  |  |  |  |  |  |  |  |  |  |  |  |  |  |  |  |  |  |  |  |  |  |  |  |  |  |  |  |  |  |  |  |  |  |  |  |  |  |  |  |  |  |  |  |  |  |  |  |  |  |  |  |  |  |  |  |  |  |  |  |  |  |  |  |  |  |  |  |  |  |  |  |  |  |  |  |  |  |  |  |  |  |  |  |  |  |  |  |  |  |  |  |  |  |  |  |  |  |  |  |  |  |  |  |  |  |  |  |  |  |  |  |  |  |  |  |  |  |  |  |  |  |  |  |  |  |  |  |  |  |  |  |  |  |  |  |  |  |  |  |  |  |  |  |  |  |  |  |  |  |  |  |  |  |  |  |  |  |  |  |  |  |  |  |  |  |  |  |  |  |  |  |  |  |  |  |  |  |  |  |  |  |  |  |  |  |  |  |  |  |  |  |  |  |  |  |  |  |  |  |  |  |  |  |  |  |  |  |  |  |  |  |  |  |  |  |  |  |  |  |  |  |  |  |  |  |  |  |  |  |  |  |  |  |  |  |  |  |  |  |  |  |  |  |  |  |  |  |  |  |  |  |  |  |  |  |  |  |  |  |  |  |  |  |  |  |  |  |  |  |  |  |  |  |  |  |  |  |  |  |  |  |  |  |  |  |  |  |  |  |  |  |  |  |  |  |  |  |  |  |  |  |  |  |  |  |  |  |  |  |  |  |  |  |  |  |  |  |  |  |  |  |  |  |  |  |  |  |  |  |  |  |  |  |  |  |  |  |  |  |  |  |  |  |  |  |  |  |  |  |  |  |  |  |  |  |  |  |  |  |  |  |  |  |  |  |  |  |  |  |  |  |  |  |  |  |  |  |  |  |  |  |  |  |  |  |  |  |  |  |  |  |  |  |  |  |  |  |  |  |  |  |  |  |  |  |  |  |  |  |  |  |  |  |  |  |  |  |  |  |  |  |  |  |  |  |  |  |  |  |  |  |  |  |  |  |  |  |  |  |  |  |  |  |  |  |  |  |  |  |  |  |  |  |  |  |  |  |  |  |  |  |  |  |  |  |  |  |  |  |  |  |  |  |  |  |  |  |  |  |  |  |  |  |  |  |  |  |  |  |  |  |  |  |  |  |  |  |  |  |  |  |  |  |  |  |  |  |  |  |  |  |  |  |  |  |  |  |  |  |  |  |  |  |  |  |  |  |  |  |  |  |  |  |  |  |  |  |  |  |  |  |  |  |  |  |  |  |  |  |  |  |  |  |  |  |  |  |  |  |  |  |  |  |  |  |  |  |  |  |  |  |  |  |  |  |  |  |  |  |  |  |  |  |  |  |  |  |  |  |  |  |  |  |  |  |  |  |  |  |  |  |  |  |  |  |  |  |  |  |  |  |  |  |  |  |  |  |  |  |  |  |  |  |  |  |  |  |  |  |  |  |  |  |  |  |  |  |  |  |  |  |  |  |  |  |  |  |  |  |  |  |  |  |  |  |  |  |  |  |  |  |  |  |  |  |  |  |  |  |  |  |  |  |  |  |  |  |  |  |  |  |  |  |  |  |  |  |  |  |  |  |  |  |  |  |  |  |  |  |  |  |  |  |  |  |  |  |  |  |  |  |  |  |  |  |  |  |  |  |  |  |  |  |  |  |  |  |  |  |  |  |  |  |  |  |  |  |  |  |  |  |  |  |  |  |  |  |  |

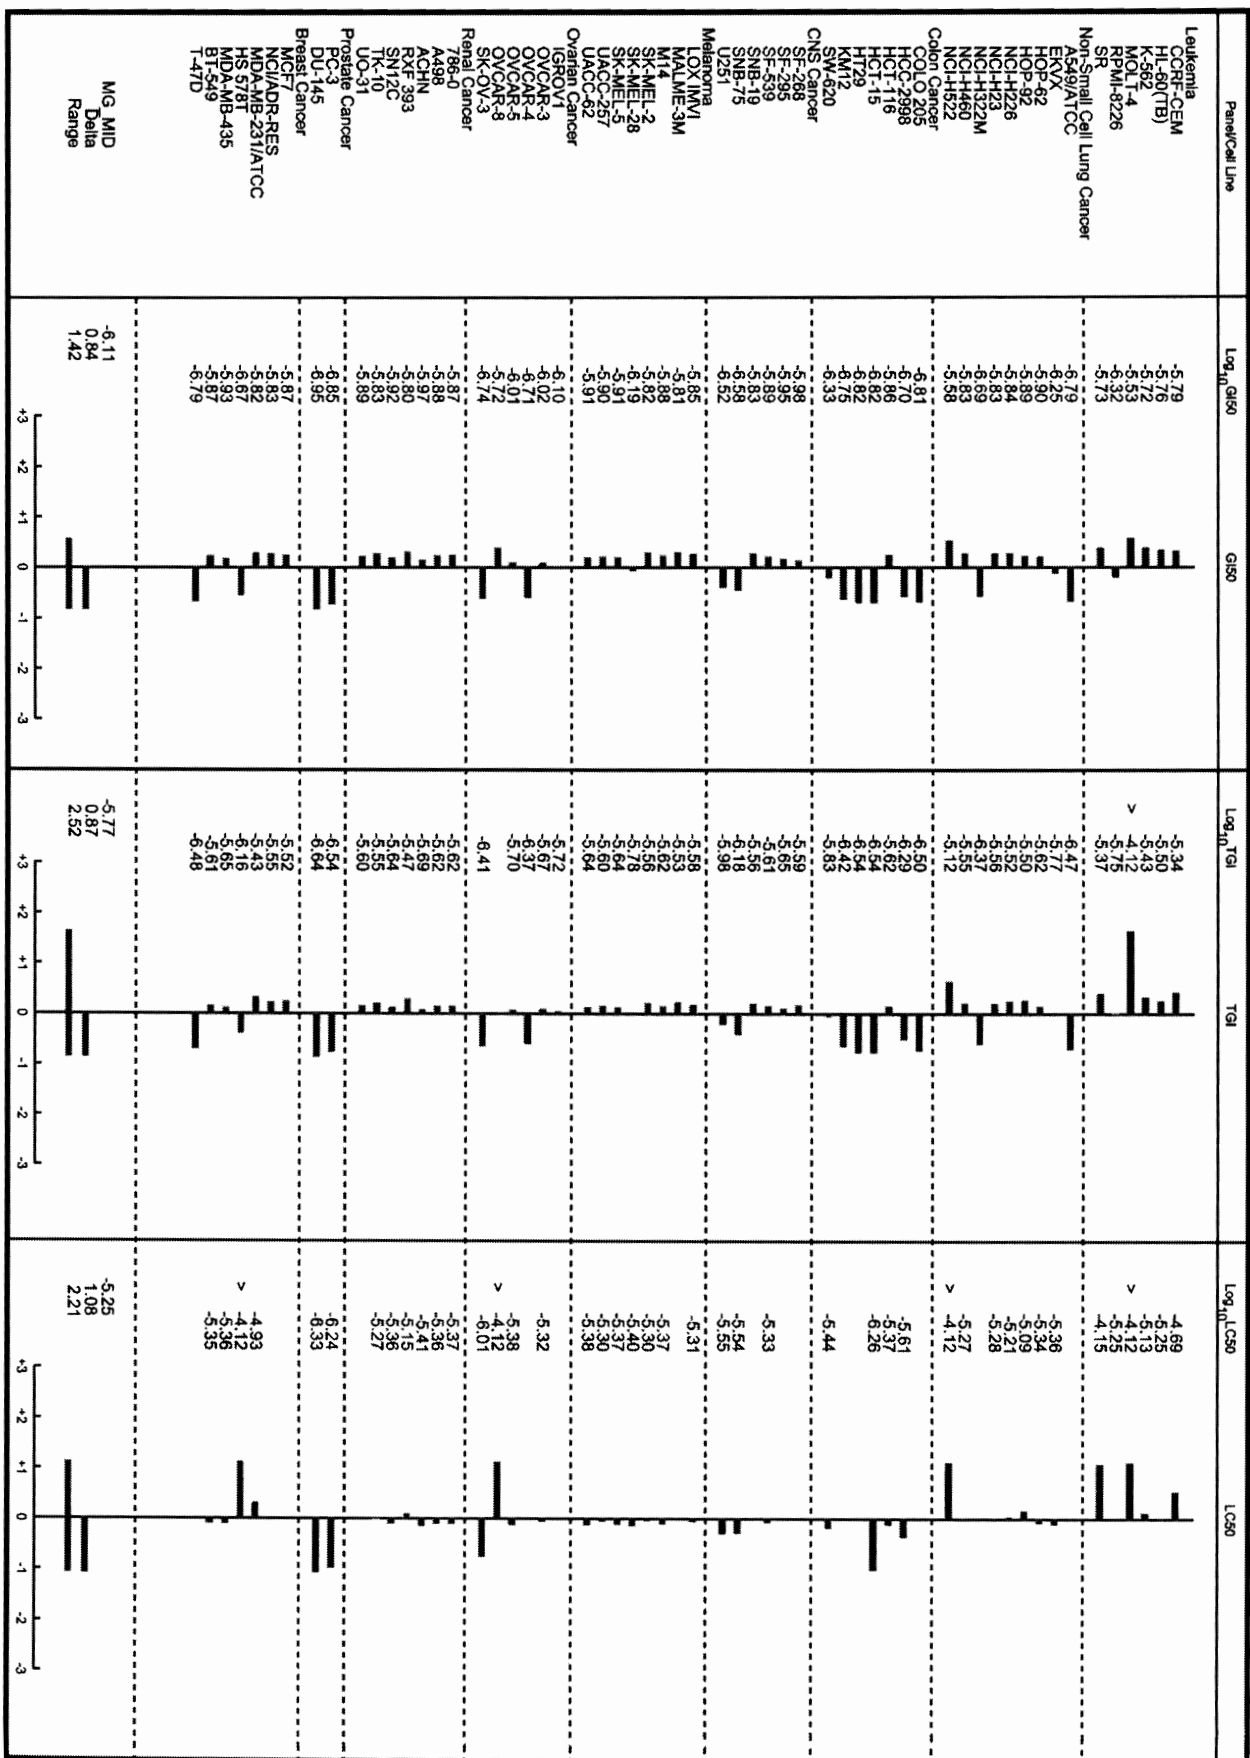



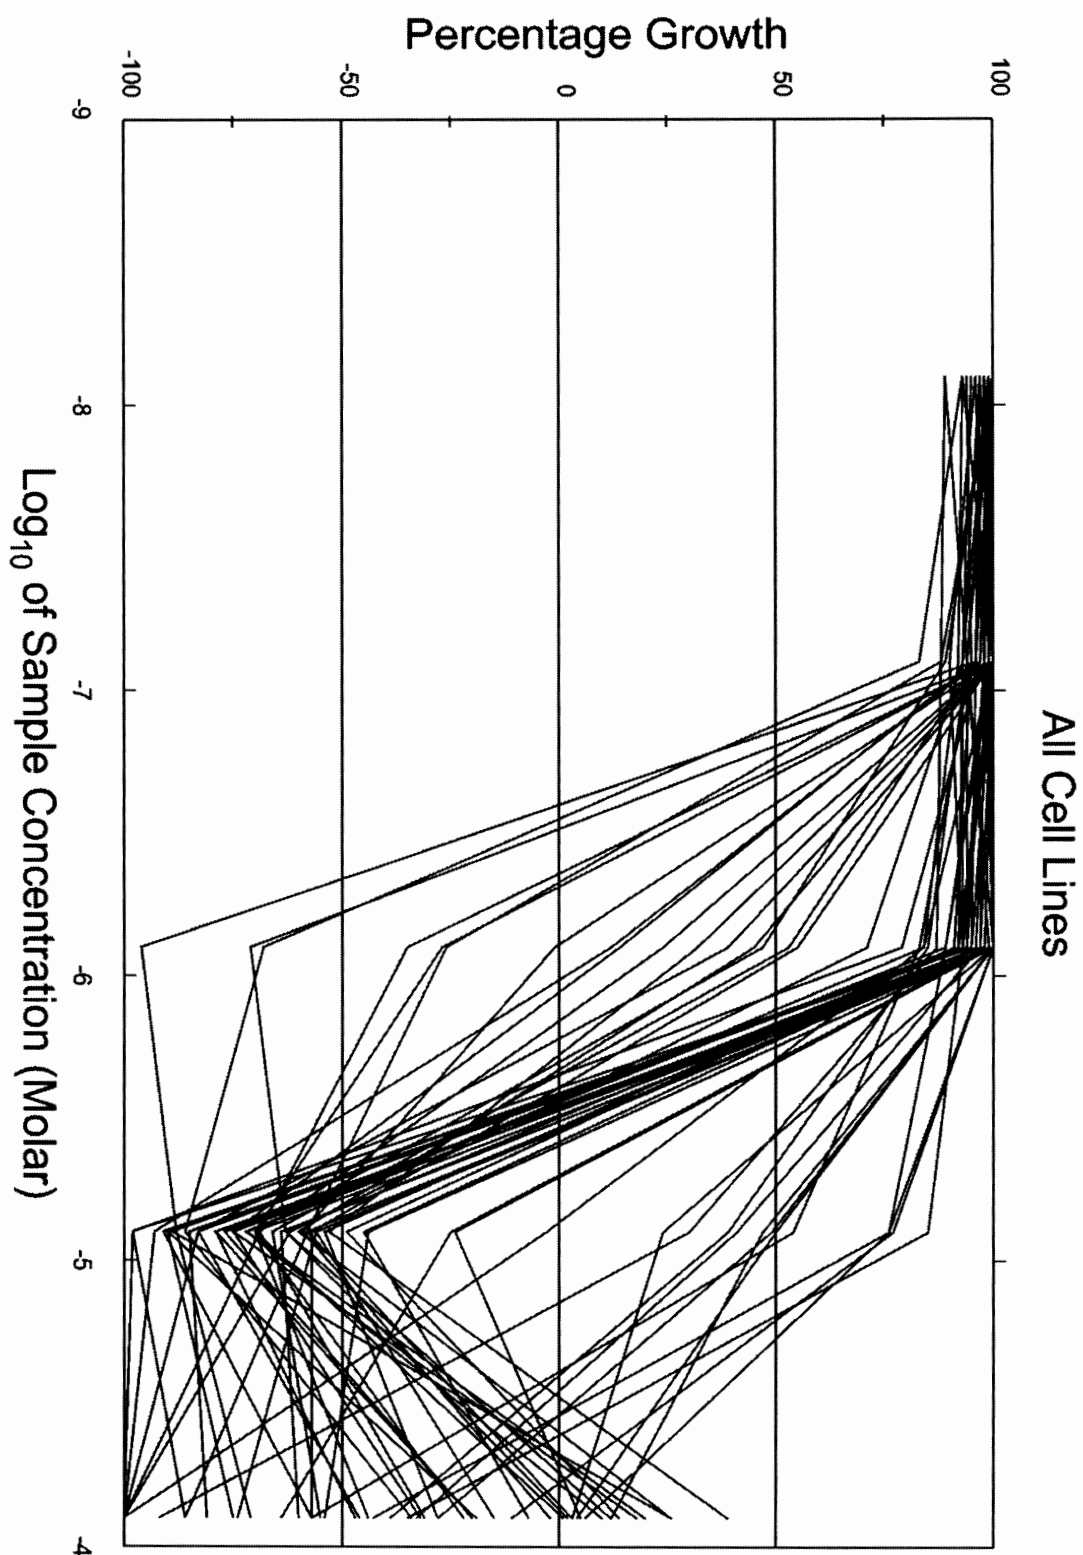

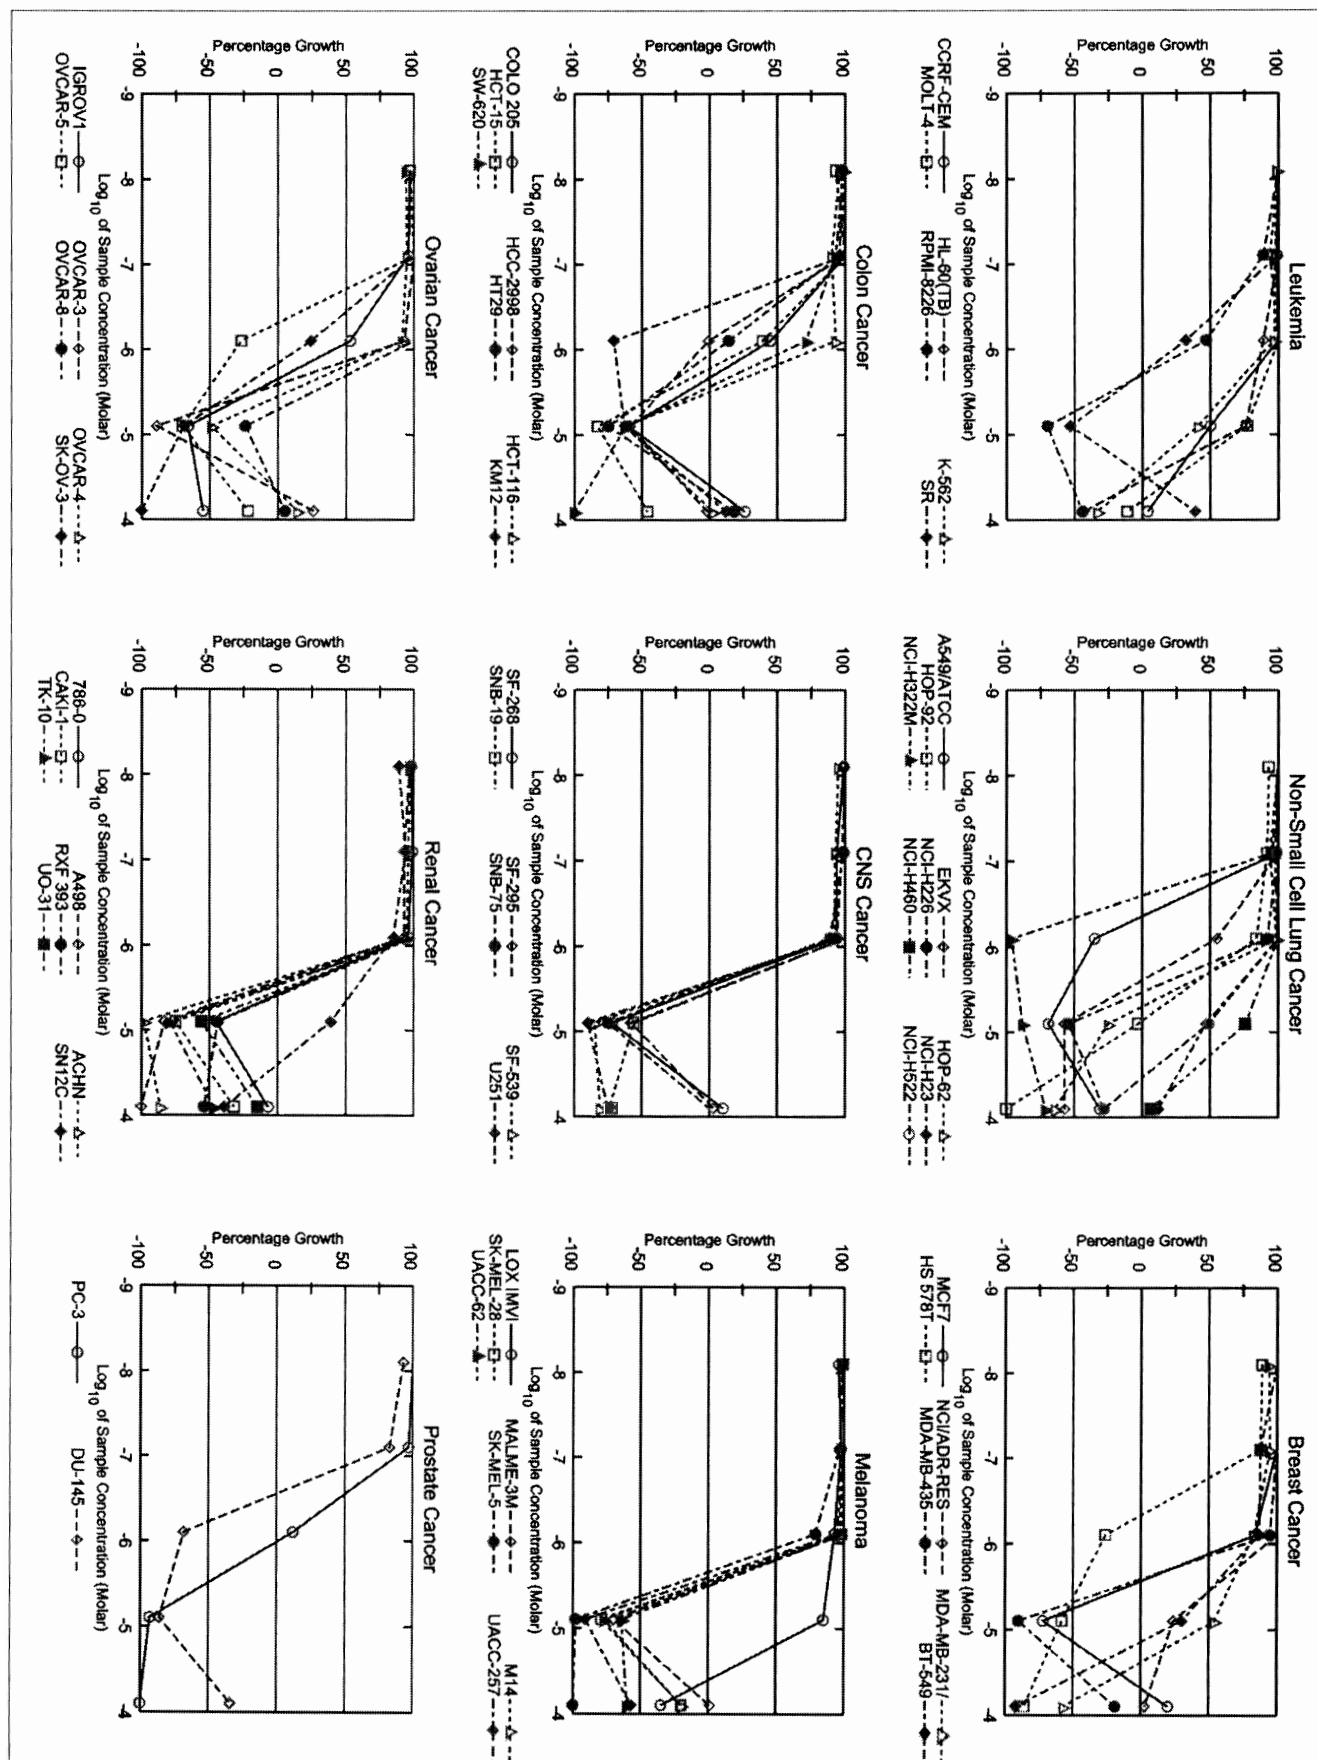

| Panel/Cell Line            | Time  | Zero  | Ctrl  | Mean Optical Densities |       |       |        |      | Log10 Concentration |      |      |      |      | Percent Growth |           |           |           |  | GI50 | TGI | LC50 |
|----------------------------|-------|-------|-------|------------------------|-------|-------|--------|------|---------------------|------|------|------|------|----------------|-----------|-----------|-----------|--|------|-----|------|
|                            |       |       |       | -8.1                   | -7.1  | -6.1  | -5.1   | -4.1 | -8.1                | -7.1 | -6.1 | -5.1 | -4.1 |                |           |           |           |  |      |     |      |
| Leukemia                   |       |       |       |                        |       |       |        |      |                     |      |      |      |      |                |           |           |           |  |      |     |      |
| CCRF-CEM                   | 0.299 | 1.415 | 1.498 | 1.405                  | 1.439 | 0.859 | 0.348  |      | 107                 | 99   | 102  | 50   | 4    | 7.56E-6        | > 7.50E-5 | > 7.50E-5 |           |  |      |     |      |
| HL-60(TB)                  | 0.414 | 2.157 | 2.309 | 2.162                  | 1.966 | 1.744 | 0.238  |      | 109                 | 100  | 89   | 76   | -43  | 1.25E-5        | > 7.50E-5 | > 7.50E-5 |           |  |      |     |      |
| K-562                      | 0.163 | 1.646 | 1.628 | 1.617                  | 1.600 | 0.772 | 0.109  |      | 99                  | 98   | 97   | 41   | -33  | 5.19E-6        | > 7.50E-5 | > 7.50E-5 |           |  |      |     |      |
| MOLT-4                     | 0.488 | 2.077 | 2.157 | 1.986                  | 2.108 | 1.707 | 0.436  |      | 105                 | 94   | 102  | 77   | -11  | 1.51E-5        | > 7.50E-5 | > 7.50E-5 |           |  |      |     |      |
| RPMI-8226                  | 0.713 | 2.224 | 2.333 | 2.051                  | 1.425 | 0.213 | 0.398  |      | 107                 | 89   | 47   | -70  | -44  | 6.38E-7        | 1.89E-6   |           |           |  |      |     |      |
| SR                         | 0.248 | 0.822 | 0.819 | 0.837                  | 0.430 | 0.117 | 0.472  |      | 100                 | 103  | 32   | -53  | 39   | 4.13E-7        |           |           |           |  |      |     |      |
| Non-Small Cell Lung Cancer |       |       |       |                        |       |       |        |      |                     |      |      |      |      |                |           |           |           |  |      |     |      |
| A549/ATCC                  | 0.449 | 1.557 | 1.620 | 1.638                  | 0.292 | 0.139 | 0.310  |      | 106                 | 107  | -35  | -69  | -31  | 1.89E-7        | 4.25E-7   |           |           |  |      |     |      |
| ECVX                       | 0.403 | 1.148 | 1.259 | 1.199                  | 0.811 | 0.174 | 0.175  |      | 115                 | 107  | 55   | -57  | -57  | 8.26E-7        | 2.32E-6   |           |           |  |      |     |      |
| HOP-62                     | 0.372 | 1.287 | 1.299 | 1.231                  | 1.274 | 0.278 | 0.135  |      | 101                 | 94   | 99   | -25  | -84  | 1.85E-6        | 4.69E-6   |           |           |  |      |     |      |
| HOP-92                     | 1.035 | 1.464 | 1.433 | 1.429                  | 1.394 | 1.000 | -0.005 |      | 93                  | 92   | 84   | -3   | -100 | 1.82E-6        | 6.88E-6   |           |           |  |      |     |      |
| NCI-H226                   | 0.816 | 1.760 | 1.860 | 1.856                  | 1.688 | 0.375 | 0.591  |      | 111                 | 110  | 92   | -54  | -28  | 3.21E-6        | 1.48E-6   |           |           |  |      |     |      |
| NCI-H23                    | 0.360 | 1.006 | 1.036 | 1.031                  | 1.019 | 0.664 | 0.440  |      | 105                 | 104  | 102  | 47   | 12   | 6.61E-6        | > 7.50E-5 | > 7.50E-5 |           |  |      |     |      |
| NCI-H322M                  | 0.701 | 1.799 | 1.859 | 1.761                  | 0.029 | 0.086 | 0.207  |      | 105                 | 96   | -86  | -88  | -71  | 1.31E-7        | 2.38E-7   |           |           |  |      |     |      |
| NCI-H460                   | 0.241 | 1.845 | 1.903 | 1.808                  | 1.838 | 1.480 | 0.332  |      | 104                 | 98   | 100  | 76   | 6    | 1.78E-5        | > 7.50E-5 | > 7.50E-5 |           |  |      |     |      |
| NCI-H522                   | 0.437 | 0.962 | 0.962 | 0.948                  | 1.014 | 0.891 | 0.316  |      | 102                 | 99   | 112  | 49   | -28  | 7.32E-6        | 3.27E-5   | > 7.50E-5 | > 7.50E-5 |  |      |     |      |
| Colon Cancer               |       |       |       |                        |       |       |        |      |                     |      |      |      |      |                |           |           |           |  |      |     |      |
| COLO 205                   | 0.202 | 0.821 | 0.885 | 0.860                  | 0.480 | 0.081 | 0.365  |      | 110                 | 106  | 45   | -60  | 26   | 6.18E-7        |           |           |           |  |      |     |      |
| HCC-2998                   | 0.417 | 1.348 | 1.401 | 1.354                  | 0.413 | 0.173 | 0.410  |      | 106                 | 101  | -1   | -59  | -2   | 2.36E-7        | 7.32E-7   |           |           |  |      |     |      |
| HCT-116                    | 0.185 | 1.682 | 1.624 | 1.536                  | 1.580 | 0.069 | 0.222  |      | 96                  | 90   | 93   | -63  | 2    | 1.42E-6        |           |           |           |  |      |     |      |
| HCT-15                     | 0.223 | 1.282 | 1.208 | 1.293                  | 0.632 | 0.038 | 0.120  |      | 93                  | 101  | 39   | -83  | -46  | 4.92E-7        | 1.59E-6   |           |           |  |      |     |      |
| HT29                       | 0.210 | 1.530 | 1.497 | 1.481                  | 0.390 | 0.053 | 0.450  |      | 98                  | 96   | 14   | -75  | 18   | 2.72E-7        |           |           |           |  |      |     |      |
| KM12                       | 0.458 | 2.087 | 2.053 | 2.146                  | 0.135 | 0.171 | 0.657  |      | 98                  | 104  | -71  | -63  | 12   | 1.52E-7        |           |           |           |  |      |     |      |
| SW-620                     | 0.157 | 1.038 | 1.033 | 0.980                  | 0.783 | 0.080 | -0.077 |      | 99                  | 93   | 71   | -82  | -100 | 1.08E-6        | 2.56E-6   |           |           |  |      |     |      |
| CNS Cancer                 |       |       |       |                        |       |       |        |      |                     |      |      |      |      |                |           |           |           |  |      |     |      |
| SF-268                     | 0.502 | 1.748 | 1.738 | 1.677                  | 1.670 | 0.139 | 0.621  |      | 99                  | 94   | 94   | -72  | 10   | 1.38E-6        |           |           |           |  |      |     |      |
| SF-295                     | 0.678 | 2.360 | 2.351 | 2.363                  | 2.370 | 0.283 | 0.732  |      | 99                  | 100  | 101  | -58  | 3    | 1.56E-6        |           |           |           |  |      |     |      |
| SF-539                     | 0.738 | 1.858 | 1.807 | 1.778                  | 1.770 | 0.112 | 0.137  |      | 95                  | 93   | 92   | -85  | -81  | 1.30E-6        | 2.49E-6   |           |           |  |      |     |      |
| SNB-19                     | 0.421 | 1.384 | 1.439 | 1.412                  | 1.414 | 0.185 | 0.108  |      | 106                 | 103  | 103  | -58  | -74  | 1.62E-6        | 3.33E-6   |           |           |  |      |     |      |
| SNB-75                     | 0.590 | 1.139 | 1.168 | 1.131                  | 1.077 | 0.143 | 0.579  |      | 105                 | 99   | 89   | -75  |      | 1.29E-6        | 2.61E-6   |           |           |  |      |     |      |
| U251                       | 0.226 | 1.172 | 1.180 | 1.149                  | 1.119 | 0.023 | 0.056  |      | 101                 | 98   | 94   | -90  | -75  | 1.31E-6        | 2.44E-6   |           |           |  |      |     |      |
| Melanoma                   |       |       |       |                        |       |       |        |      |                     |      |      |      |      |                |           |           |           |  |      |     |      |
| LOX IMVI                   | 0.260 | 1.833 | 1.776 | 1.799                  | 1.718 | 1.598 | 0.170  |      | 96                  | 98   | 93   | 85   | -35  | 1.47E-5        | 3.85E-5   |           |           |  |      |     |      |
| MA9ME-3M                   | 0.667 | 1.244 | 1.296 | 1.351                  | 1.374 | 0.202 | 0.675  |      | 102                 | 118  | 122  | -70  | 1    | 1.79E-6        |           |           |           |  |      |     |      |
| M14                        | 0.360 | 1.188 | 1.206 | 1.195                  | 1.163 | 0.082 | 0.288  |      | 109                 | 101  | 97   | -77  | -20  | 1.39E-6        | 2.70E-6   |           |           |  |      |     |      |
| SK-MEL-28                  | 0.695 | 1.994 | 1.976 | 2.011                  | 1.969 | 0.142 | 0.546  |      | 99                  | 101  | 98   | -79  | -20  | 1.40E-6        | 2.68E-6   |           |           |  |      |     |      |
| SK-MEL-5                   | 0.336 | 1.150 | 1.144 | 1.126                  | 0.980 | 0.007 | 0.065  |      | 99                  | 97   | 79   | -98  | -100 | 1.09E-6        | 2.10E-6   |           |           |  |      |     |      |
| UACC-257                   | 0.618 | 1.315 | 1.345 | 1.338                  | 1.282 | 0.054 | 0.264  |      | 104                 | 103  | 95   | -91  | -57  | 1.31E-6        | 2.43E-6   |           |           |  |      |     |      |
| UACC-62                    | 0.435 | 1.699 | 1.705 | 1.793                  | 1.725 | 0.156 | 0.176  |      | 100                 | 107  | 102  | -64  | -60  | 1.54E-6        | 3.08E-6   |           |           |  |      |     |      |
| Ovarian Cancer             |       |       |       |                        |       |       |        |      |                     |      |      |      |      |                |           |           |           |  |      |     |      |
| IGROV1                     | 0.241 | 0.738 | 0.724 | 0.717                  | 0.503 | 0.083 | 0.109  |      | 97                  | 96   | 53   | -66  | -55  | 7.91E-7        | 2.09E-6   |           |           |  |      |     |      |
| OVCAR-3                    | 0.487 | 1.286 | 1.399 | 1.381                  | 1.232 | 0.056 | 0.695  |      | 114                 | 112  | 93   | -89  | 26   | 1.30E-6        |           |           |           |  |      |     |      |
| OVCAR-4                    | 0.382 | 1.098 | 1.057 | 1.082                  | 1.030 | 0.184 | 0.488  |      | 94                  | 95   | 91   | -49  | 14   | 1.47E-6        |           |           |           |  |      |     |      |
| OVCAR-5                    | 0.583 | 1.863 | 1.826 | 1.902                  | 0.424 | 0.177 | 0.455  |      | 97                  | 103  | -27  | -70  | -22  | 1.91E-7        | 4.63E-7   |           |           |  |      |     |      |
| OVCAR-8                    | 0.552 | 1.798 | 1.827 | 1.865                  | 1.894 | 0.422 | 0.617  |      | 102                 | 105  | 108  | -24  | 5    | 2.08E-6        |           |           |           |  |      |     |      |
| SK-OV-3                    | 0.573 | 1.046 | 1.101 | 1.091                  | 0.688 | 0.177 | -0.018 |      | 112                 | 109  | 24   | -69  | -100 | 3.74E-7        | 1.38E-6   |           |           |  |      |     |      |
| Renal Cancer               |       |       |       |                        |       |       |        |      |                     |      |      |      |      |                |           |           |           |  |      |     |      |
| 786-O                      | 0.590 | 2.208 | 2.184 | 2.186                  | 2.147 | 0.319 | 0.539  |      | 98                  | 99   | 96   | -45  | -7   | 1.59E-6        | 3.60E-6   |           |           |  |      |     |      |
| A498                       | 0.482 | 0.997 | 0.981 | 0.958                  | 0.960 | 0.077 | 0.001  |      | 97                  | 83   | 93   | -83  | -100 | 1.31E-6        | 2.53E-6   |           |           |  |      |     |      |
| ACHN                       | 0.367 | 1.326 | 1.286 | 1.290                  | 1.277 | 0.006 | 0.051  |      | 97                  | 86   | 95   | -98  | -86  | 1.28E-6        | 2.32E-6   |           |           |  |      |     |      |
| CAKI-1                     | 0.571 | 1.098 | 1.132 | 1.137                  | 1.138 | 0.144 | 0.367  |      | 106                 | 107  | 108  | -75  | -32  | 1.55E-6        | 2.92E-6   |           |           |  |      |     |      |
| RFX 393                    | 0.508 | 0.701 | 0.747 | 0.785                  | 0.785 | 0.284 | 0.234  |      | 98                  | 114  | 114  | -44  | -54  | 1.90E-6        | 3.94E-6   |           |           |  |      |     |      |
| SN12C                      | 0.537 | 1.707 | 1.577 | 1.638                  | 1.532 | 0.987 | 0.336  |      | 89                  | 94   | 85   | 39   | -39  | 4.37E-6        | 2.37E-5   |           |           |  |      |     |      |
| Tk-10                      | 0.571 | 1.169 | 1.214 | 1.221                  | 1.224 | 0.119 | 0.305  |      | 107                 | 109  | 109  | -79  | 47   | 1.54E-6        | 2.85E-6   |           |           |  |      |     |      |
| UO-31                      | 0.302 | 1.003 | 1.046 | 1.048                  | 1.014 | 0.133 | 0.257  |      | 106                 | 106  | 102  | -56  | -15  | 1.59E-6        | 3.30E-6   |           |           |  |      |     |      |
| Prostate Cancer            |       |       |       |                        |       |       |        |      |                     |      |      |      |      |                |           |           |           |  |      |     |      |
| PC-3                       | 0.622 | 1.982 | 2.034 | 1.939                  | 0.783 | 0.045 | -0.078 |      | 104                 | 97   | 12   | -93  | -100 | 2.67E-7        | 9.73E-7   |           |           |  |      |     |      |
| DU-145                     | 0.170 | 0.686 | 0.651 | 0.598                  | 0.065 | 0.025 | 0.113  |      | 93                  | 83   | -68  | -86  | -34  | 1.24E-7        | 2.66E-7   |           |           |  |      |     |      |
| Breast Cancer              |       |       |       |                        |       |       |        |      |                     |      |      |      |      |                |           |           |           |  |      |     |      |
| MCF7                       | 0.226 | 0.993 | 1.080 | 1.036                  | 0.871 | 0.063 | 0.377  |      | 111                 | 106  | 94   | -72  | 20   | 1.24E-6        |           |           |           |  |      |     |      |
| NCI/ADR-RES                | 0.510 | 1.563 | 1.645 | 1.646                  | 1.674 | 0.782 | 0.538  |      | 108                 | 108  | 111  | 24   | 3    | 3.75E-6        | > 7.50E-5 | > 7.50E-5 |           |  |      |     |      |
| MDA-MB-231/ATCC            | 0.515 | 1.190 | 1.149 | 1.165                  | 1.078 | 0.881 | 0.224  |      | 94                  | 95   | 83   | 54   | -57  | 8.19E-6        | 2.32E-5   |           |           |  |      |     |      |
| HS 578T                    | 0.432 | 0.776 | 0.737 | 0.736                  | 0.320 | 0.180 | 0.050  |      | 89                  | 88   | -26  | -58  | -86  | 1.62E-7        | 4.44E-7   |           |           |  |      |     |      |
| MDA-MB-435                 | 0.435 | 1.584 | 1.623 | 1.637                  | 1.528 | 0.044 | 0.353  |      | 103                 | 105  | 95   | -90  | -19  | 1.31E-6        | 2.49E-6   |           |           |  |      |     |      |
| BT-549                     | 0.405 | 0.989 | 1.188 | 0.921                  | 0.911 | 0.578 | 0.031  |      | 134                 | 88   | 87   | 30   | -92  | 3.30E-6        | 1.31E-5   |           |           |  |      |     |      |

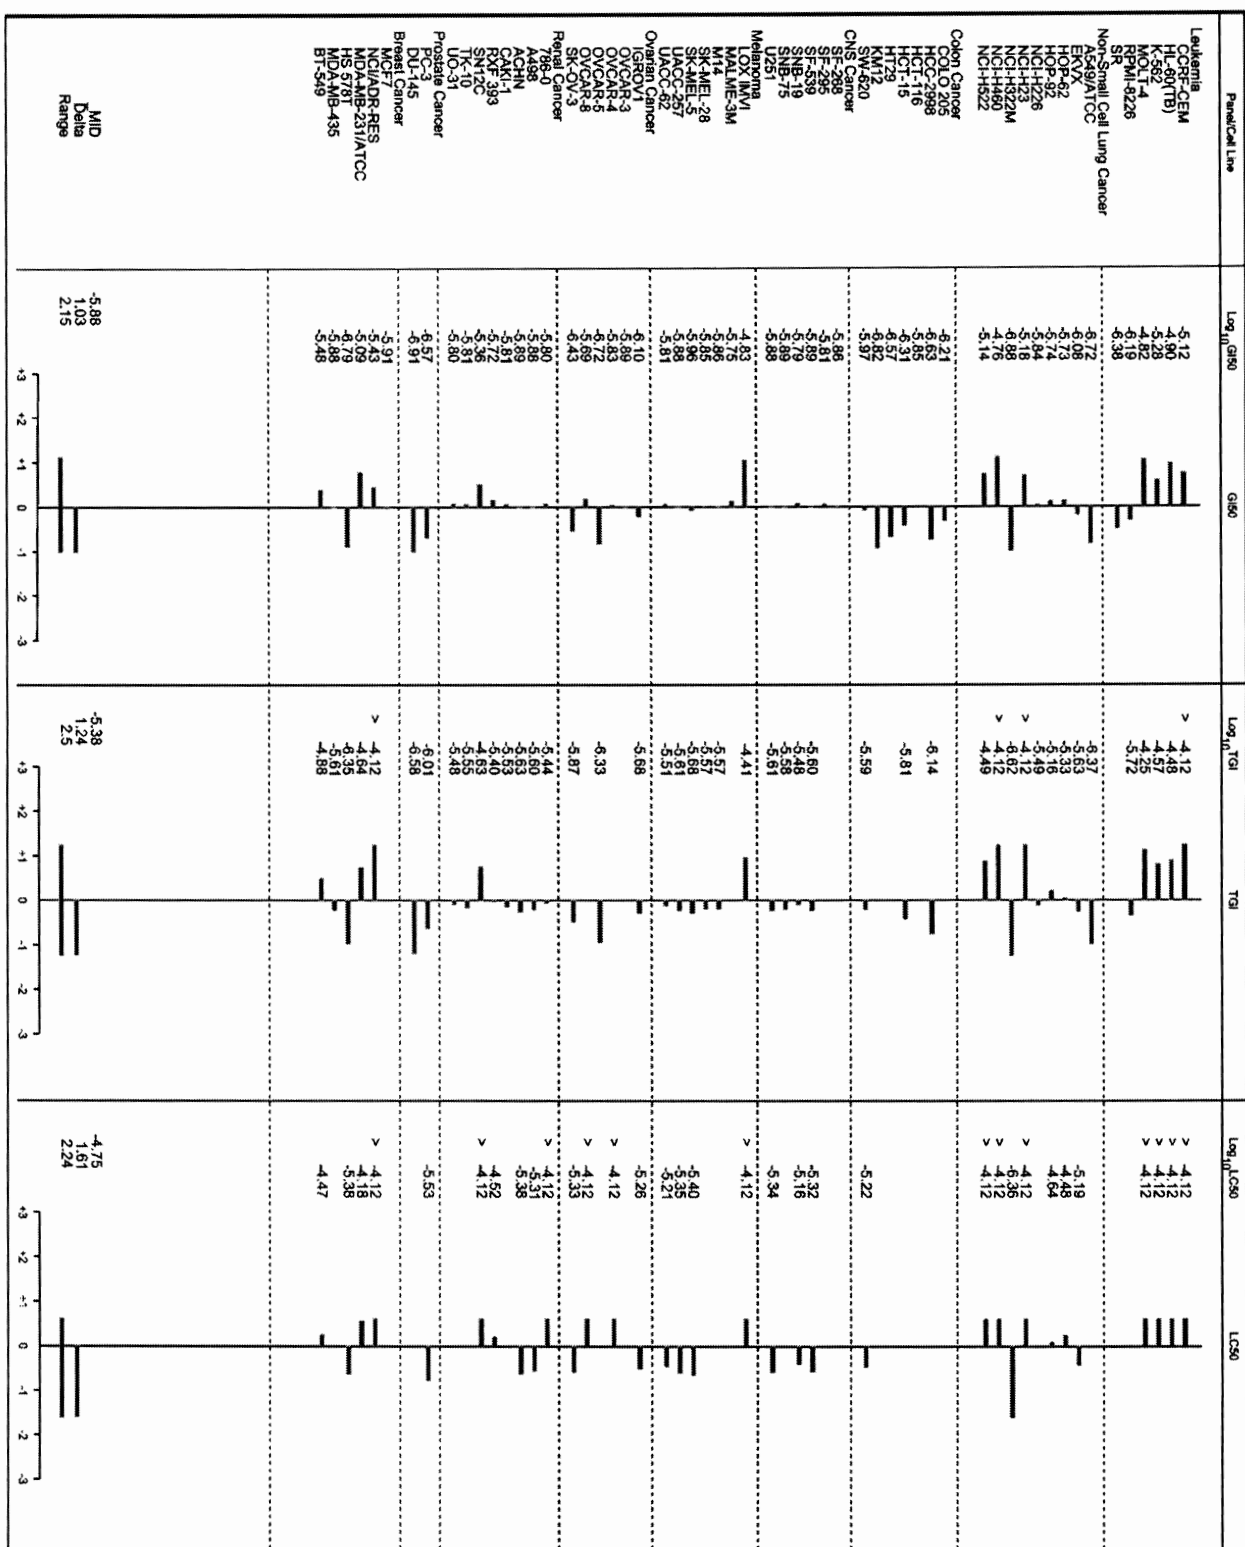

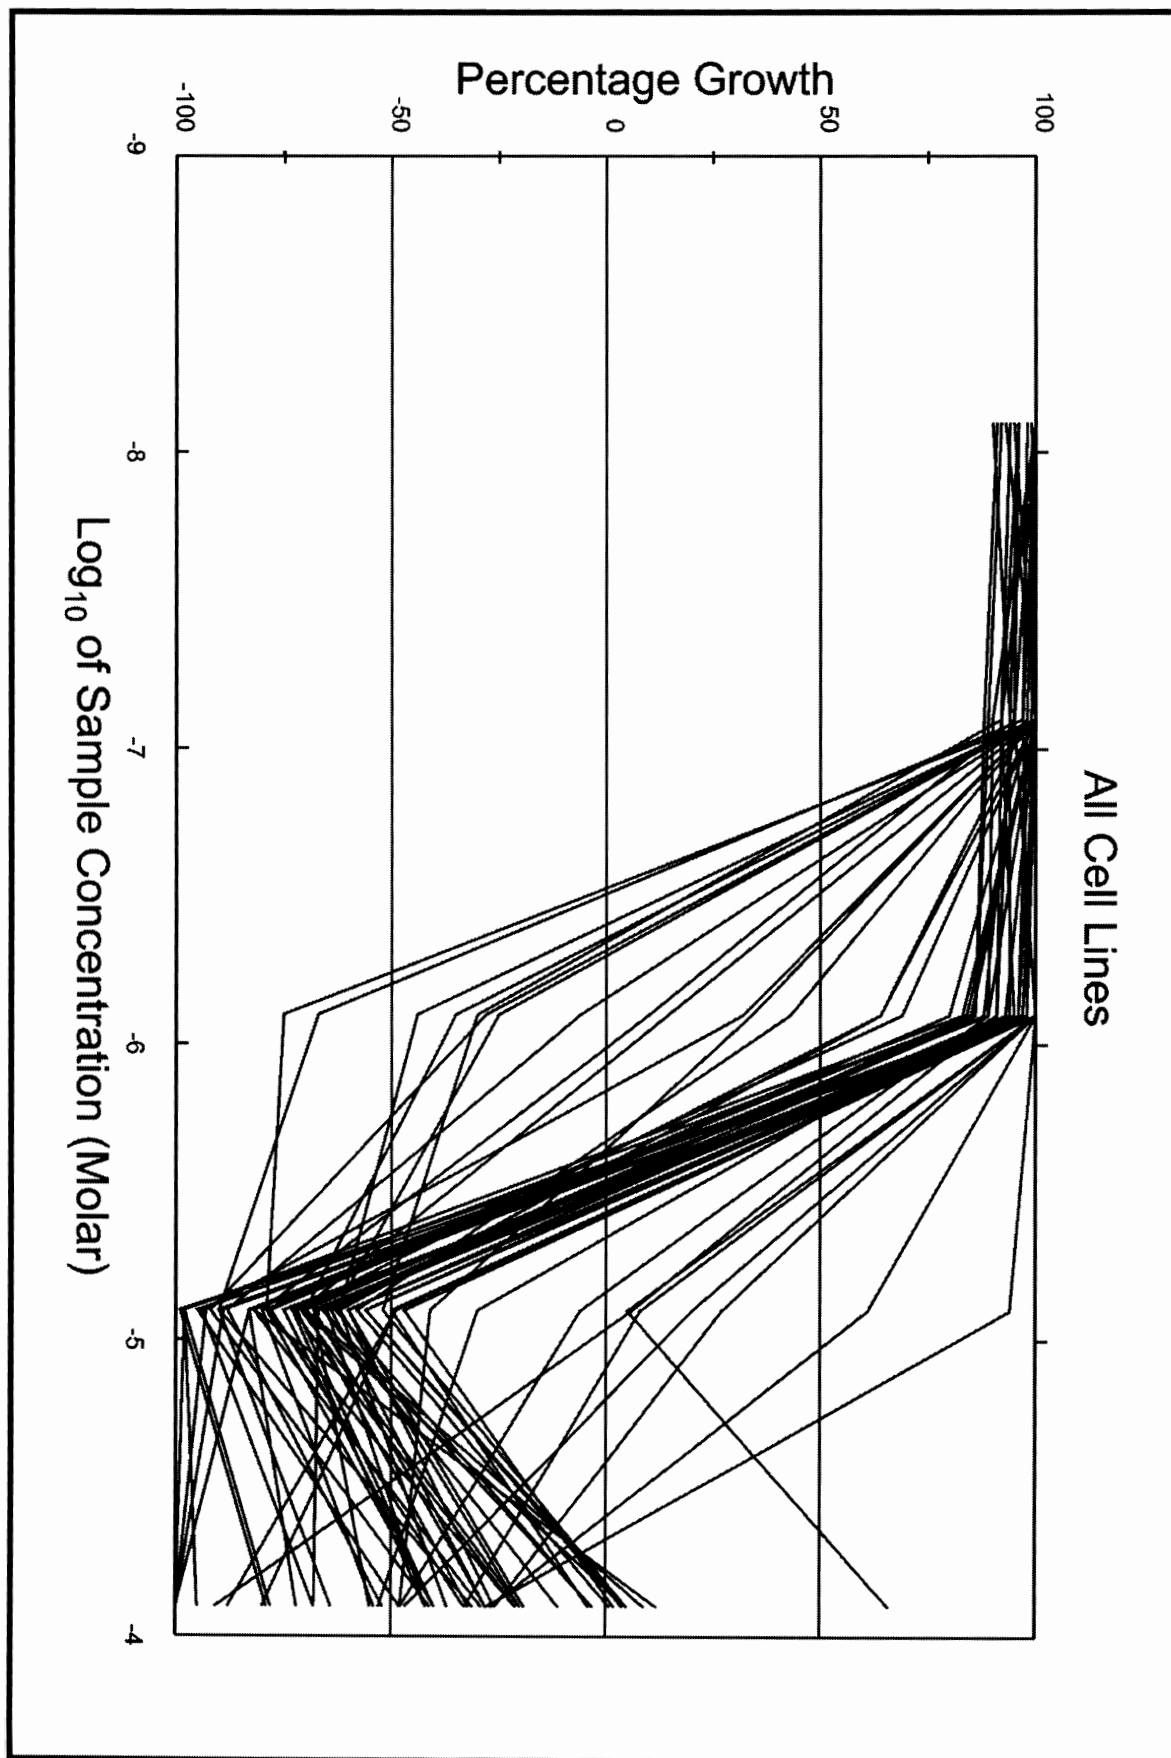



| Parent/Cell Line           | Time             | CHI   | Log10 Concentration    |       |       |       |       |        |      |      |     |     | GI50    | TGI     | LC50      |           |     |     |     |     |
|----------------------------|------------------|-------|------------------------|-------|-------|-------|-------|--------|------|------|-----|-----|---------|---------|-----------|-----------|-----|-----|-----|-----|
|                            |                  |       | Mean Optical Densities |       |       |       |       |        |      |      |     |     |         |         |           |           |     |     |     |     |
| Leukemia                   | Zero             | -8.1  | -7.1                   | -6.1  | -5.1  | -4.1  | -3.1  | -2.1   | -1.1 | -0.1 | 0.1 | 0.2 | 0.3     | 0.4     | 0.5       | 0.6       | 0.7 | 0.8 | 0.9 | 1.0 |
|                            | 0.485            | 1.317 | 1.459                  | 1.491 | 1.546 | 0.656 | 0.261 | 117    | 121  | 128  | 20  | -47 | 3.92E-6 | 1.47E-5 | > 7.50E-5 |           |     |     |     |     |
|                            | 0.612            | 2.050 | 2.217                  | 2.341 | 2.373 | 0.995 | 0.454 | 112    | 120  | 122  | 27  | -26 | 4.28E-6 | 2.41E-5 | > 7.50E-5 |           |     |     |     |     |
|                            | 0.365            | 1.309 | 1.464                  | 1.533 | 1.515 | 0.255 | 0.255 | 116    | 123  | 122  | 94  | -28 | 1.73E-6 | 4.42E-5 | > 7.50E-5 |           |     |     |     |     |
|                            | 0.889            | 2.328 | 2.841                  | 2.798 | 2.091 | 0.639 | 0.336 | 136    | 133  | 84   | -64 | -28 | 1.27E-6 | 2.76E-6 | > 7.50E-5 |           |     |     |     |     |
| Non-Small Cell Lung Cancer | SR               | 0.315 | 1.230                  | 1.335 | 1.513 | 1.517 | 0.388 | 0.213  | 111  | 131  | 8   | -33 | 3.42E-6 | 1.18E-5 | > 7.50E-5 |           |     |     |     |     |
|                            | AS4/ATCC         | 0.311 | 1.725                  | 1.721 | 1.615 | 0.217 | 0.148 | 0.382  | 100  | 92   | -30 | -52 | 1.86E-7 | 2.42E-6 |           |           |     |     |     |     |
|                            | EVX              | 0.469 | 1.358                  | 1.369 | 1.338 | 1.036 | 0.181 | 0.295  | 101  | 98   | 64  | -82 | -37     | 9.67E-7 | 2.42E-6   |           |     |     |     |     |
|                            | HOP-62           | 0.185 | 0.553                  | 0.554 | 0.567 | 0.541 | 0.059 | 0.084  | 100  | 104  | 97  | -68 | -55     | 1.44E-6 | 2.89E-6   | 5.82E-6   |     |     |     |     |
|                            | HOP-92           | 0.918 | 1.316                  | 1.324 | 1.272 | 1.272 | 0.864 | 0.102  | 102  | 90   | 89  | -6  | -48     | 1.93E-6 | 6.49E-6   | > 7.50E-5 |     |     |     |     |
| Colon Cancer               | NCI-H226         | 0.473 | 1.083                  | 1.057 | 1.037 | 1.053 | 0.165 | 0.274  | 96   | 92   | 85  | -45 | -46     | 1.43E-6 | 2.94E-6   |           |     |     |     |     |
|                            | NCI-H23          | 0.491 | 1.391                  | 1.468 | 1.520 | 1.461 | 0.250 | 0.098  | 109  | 114  | 108 | -49 | -80     | 1.75E-6 | 3.64E-6   | 7.97E-6   |     |     |     |     |
|                            | NCI-H322M        | 0.554 | 1.333                  | 1.332 | 1.464 | 0.137 | 0.115 | 0.334  | 100  | 117  | -75 | -79 | -40     | 1.67E-7 | 3.04E-7   |           |     |     |     |     |
|                            | NCI-H460         | 0.236 | 1.886                  | 1.968 | 2.072 | 1.988 | 0.105 | 0.304  | 105  | 111  | 106 | -56 | 4       | 1.67E-6 | 3.04E-7   |           |     |     |     |     |
|                            | NCI-H522         | 0.854 | 2.087                  | 2.178 | 2.279 | 2.253 | 1.606 | 0.621  | 107  | 116  | 114 | 61  | -27     | 1.00E-5 | 3.68E-5   | > 7.50E-5 |     |     |     |     |
| CNS Cancer                 | COLO 205         | 0.211 | 0.919                  | 0.981 | 0.930 | 0.214 | 0.062 | 0.247  | 109  | 102  | 102 | -71 | 5       | 2.43E-7 | 2.43E-7   | 3.51E-6   |     |     |     |     |
|                            | HCC-2998         | 0.549 | 1.615                  | 1.666 | 1.565 | 0.656 | 0.112 | 0.252  | 105  | 95   | 10  | -80 | -54     | 2.55E-7 | 9.71E-7   | 4.70E-6   |     |     |     |     |
|                            | HCT-116          | 0.124 | 1.095                  | 1.171 | 1.157 | 1.129 | 0.014 | -0.026 | 108  | 106  | 104 | -89 | -100    | 1.42E-6 | 2.59E-6   | 4.70E-6   |     |     |     |     |
|                            | HCT-15           | 0.223 | 1.512                  | 1.510 | 1.528 | 0.640 | 0.015 | -0.019 | 100  | 101  | 32  | -93 | -100    | 4.18E-7 | 1.36E-6   | 3.39E-6   |     |     |     |     |
|                            | HT29             | 0.168 | 1.123                  | 1.186 | 1.181 | 0.109 | 0.051 | 0.255  | 107  | 106  | 106 | -35 | 9       | 1.87E-7 | 5.03E-7   |           |     |     |     |     |
| Melanoma                   | SK-MEL-2         | 0.234 | 1.432                  | 1.321 | 1.293 | 1.267 | 0.015 | 0.076  | 91   | 88   | 86  | -94 | -68     | 1.19E-6 | 2.28E-6   | 4.28E-6   |     |     |     |     |
|                            | SK-MEL-5         | 0.234 | 1.432                  | 1.321 | 1.293 | 1.267 | 0.015 | 0.076  | 91   | 88   | 86  | -94 | -68     | 1.19E-6 | 2.28E-6   | 4.28E-6   |     |     |     |     |
|                            | UACC-267         | 1.047 | 2.222                  | 2.204 | 2.240 | 2.200 | 0.286 | 0.827  | 99   | 102  | 98  | -73 | -21     | 1.44E-6 | 2.82E-6   | 4.25E-6   |     |     |     |     |
|                            | UACC-62          | 0.620 | 2.267                  | 2.300 | 2.214 | 2.222 | 0.010 | -0.062 | 103  | 97   | 98  | -98 | -100    | 1.31E-6 | 2.36E-6   | 4.25E-6   |     |     |     |     |
|                            | LOX IMVI         | 0.193 | 1.301                  | 1.329 | 1.384 | 1.366 | 0.099 | 0.024  | 103  | 106  | 106 | -49 | -88     | 1.72E-6 | 3.63E-6   | 8.10E-6   |     |     |     |     |
| Ovarian Cancer             | MALME-3M         | 0.484 | 0.804                  | 0.853 | 0.861 | 0.827 | 0.166 | 0.432  | 115  | 118  | 107 | -66 | -11     | 1.81E-6 | 3.13E-6   | 4.35E-6   |     |     |     |     |
|                            | OVCA9-3          | 0.406 | 0.761                  | 0.784 | 0.809 | 0.738 | 0.120 | 0.327  | 106  | 113  | 93  | -71 | -20     | 1.38E-6 | 2.79E-6   |           |     |     |     |     |
|                            | OVCA9-4          | 0.443 | 1.041                  | 1.066 | 1.117 | 0.701 | 0.186 | 0.447  | 104  | 113  | 43  | -58 | 1       | 5.98E-7 | 2.40E-6   | 4.77E-6   |     |     |     |     |
|                            | OVCA9-5          | 0.366 | 0.854                  | 0.867 | 0.965 | 0.781 | 0.062 | 0.102  | 109  | 123  | 85  | -83 | -72     | 1.21E-6 | 2.40E-6   | > 7.50E-5 |     |     |     |     |
|                            | OVCA9-8          | 0.099 | 0.531                  | 0.531 | 0.482 | 0.521 | 0.120 | 0.386  | 107  | 95   | 105 | 5   | 66      | 2.23E-7 | 4.85E-7   | > 7.50E-5 |     |     |     |     |
| Renal Cancer               | SK-OV-3          | 0.651 | 1.411                  | 1.479 | 1.585 | 0.468 | 0.050 | 0.386  | 109  | 120  | -28 | -92 | -41     | 2.23E-7 | 4.85E-7   | > 7.50E-5 |     |     |     |     |
|                            | 786-D            | 0.322 | 1.332                  | 1.368 | 1.406 | 1.361 | 0.017 | 0.166  | 103  | 107  | 103 | -95 | -48     | 1.39E-6 | 2.48E-6   | 4.89E-6   |     |     |     |     |
|                            | A498             | 1.109 | 1.751                  | 1.750 | 1.741 | 1.728 | 0.186 | -0.052 | 100  | 98   | 96  | -83 | -100    | 1.38E-6 | 2.57E-6   | 4.89E-6   |     |     |     |     |
|                            | ACHN             | 0.204 | 0.852                  | 0.845 | 0.894 | 0.857 | 0.005 | 0.071  | 99   | 107  | 98  | -86 | -85     | 1.32E-6 | 2.37E-6   | 4.27E-6   |     |     |     |     |
|                            | CAN-1            | 0.399 | 0.495                  | 0.505 | 0.554 | 0.529 | 0.126 | 0.288  | 110  | 161  | 135 | -68 | -28     | 1.97E-6 | 3.46E-6   | 5.42E-5   |     |     |     |     |
| Breast Cancer              | MDA-MB-231(ATCC) | 0.406 | 1.399                  | 1.527 | 1.430 | 1.454 | 0.217 | 0.427  | 113  | 103  | 106 | -47 | 2       | 1.74E-6 | 8.70E-6   | > 7.50E-5 |     |     |     |     |
|                            | MDA-MB-231(ATCC) | 0.377 | 1.096                  | 1.067 | 1.051 | 1.034 | 0.422 | 0.035  | 96   | 94   | 91  | 6   | -91     | 2.30E-6 | 2.13E-6   | > 7.50E-5 |     |     |     |     |
|                            | HS 578T          | 0.426 | 0.884                  | 0.882 | 0.883 | 0.882 | 0.251 | 0.221  | 100  | 108  | 34  | -41 | -48     | 4.27E-7 | 2.61E-6   | > 7.50E-5 |     |     |     |     |
|                            | MDA-MB-435       | 0.475 | 1.553                  | 1.623 | 1.638 | 1.514 | 0.087 | 0.338  | 106  | 108  | 96  | -82 | -29     | 1.37E-6 | 3.08E-6   |           |     |     |     |     |
|                            | BT-549           | 0.377 | 0.810                  | 0.765 | 0.783 | 0.782 | 0.151 | 0.281  | 90   | 94   | 94  | -80 | -26     | 1.44E-6 | 3.08E-6   |           |     |     |     |     |
| Prostate Cancer            | T-47D            | 0.627 | 1.303                  | 1.334 | 1.400 | 0.348 | 0.238 | 0.500  | 105  | 114  | -44 | -62 | -20     | 1.91E-7 | 3.94E-7   |           |     |     |     |     |
|                            | PC-3             | 0.356 | 1.055                  | 1.061 | 1.068 | 0.336 | 0.043 | 0.171  | 101  | 102  | -6  | -88 | -52     | 2.28E-7 | 6.65E-7   | 2.59E-6   |     |     |     |     |
|                            | DU-145           | 0.220 | 0.909                  | 0.894 | 0.886 | 0.072 | 0.022 | 0.079  | 98   | 97   | -67 | -90 | -64     | 1.44E-7 | 2.92E-7   | 5.88E-7   |     |     |     |     |
|                            | MCF7             | 0.287 | 1.702                  | 1.841 | 1.777 | 1.683 | 0.127 | 0.355  | 110  | 105  | 97  | -56 | 5       | 1.53E-6 |           | > 7.50E-5 |     |     |     |     |
|                            | NCI/ADR-RS       | 0.406 | 1.399                  | 1.527 | 1.430 | 1.454 | 0.217 | 0.427  | 113  | 103  | 106 | -47 | 2       | 1.74E-6 | 8.70E-6   | 2.86E-5   |     |     |     |     |

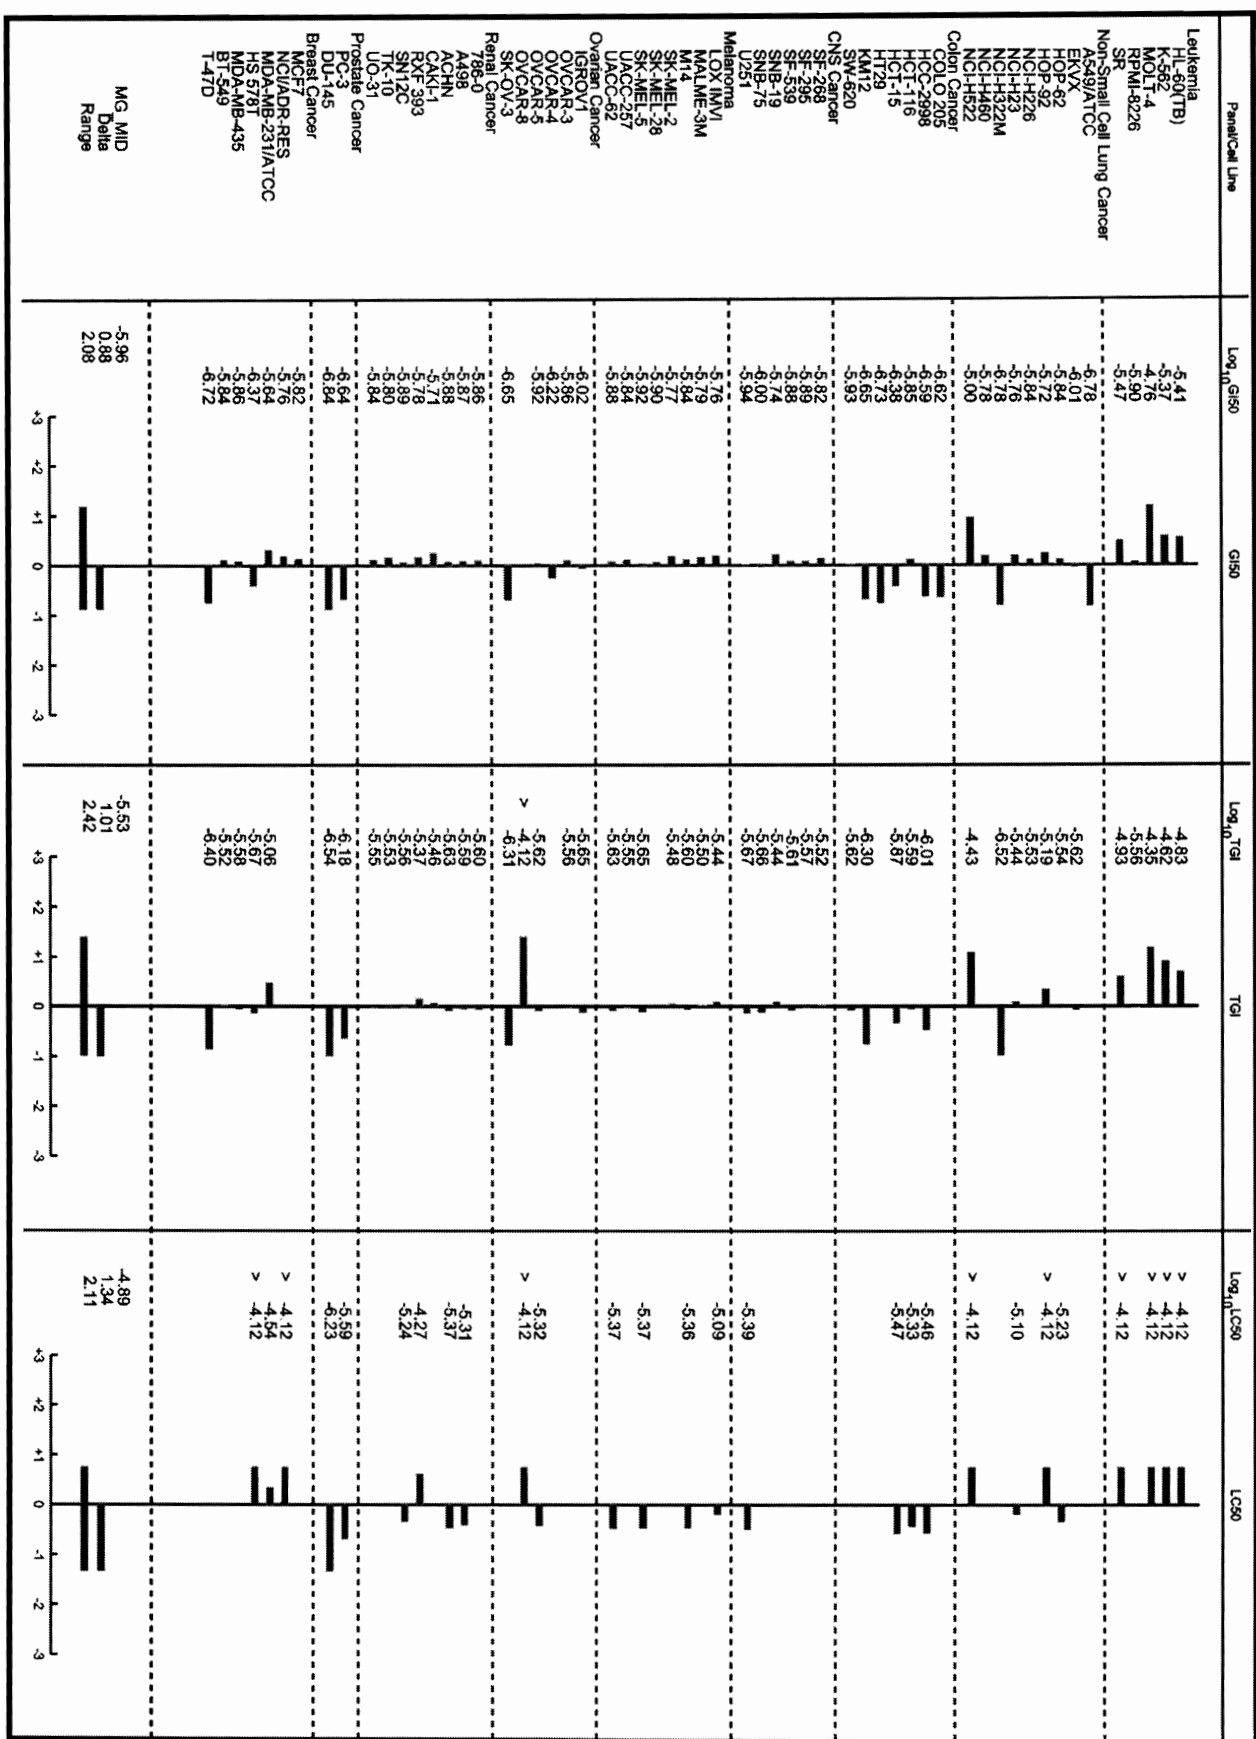



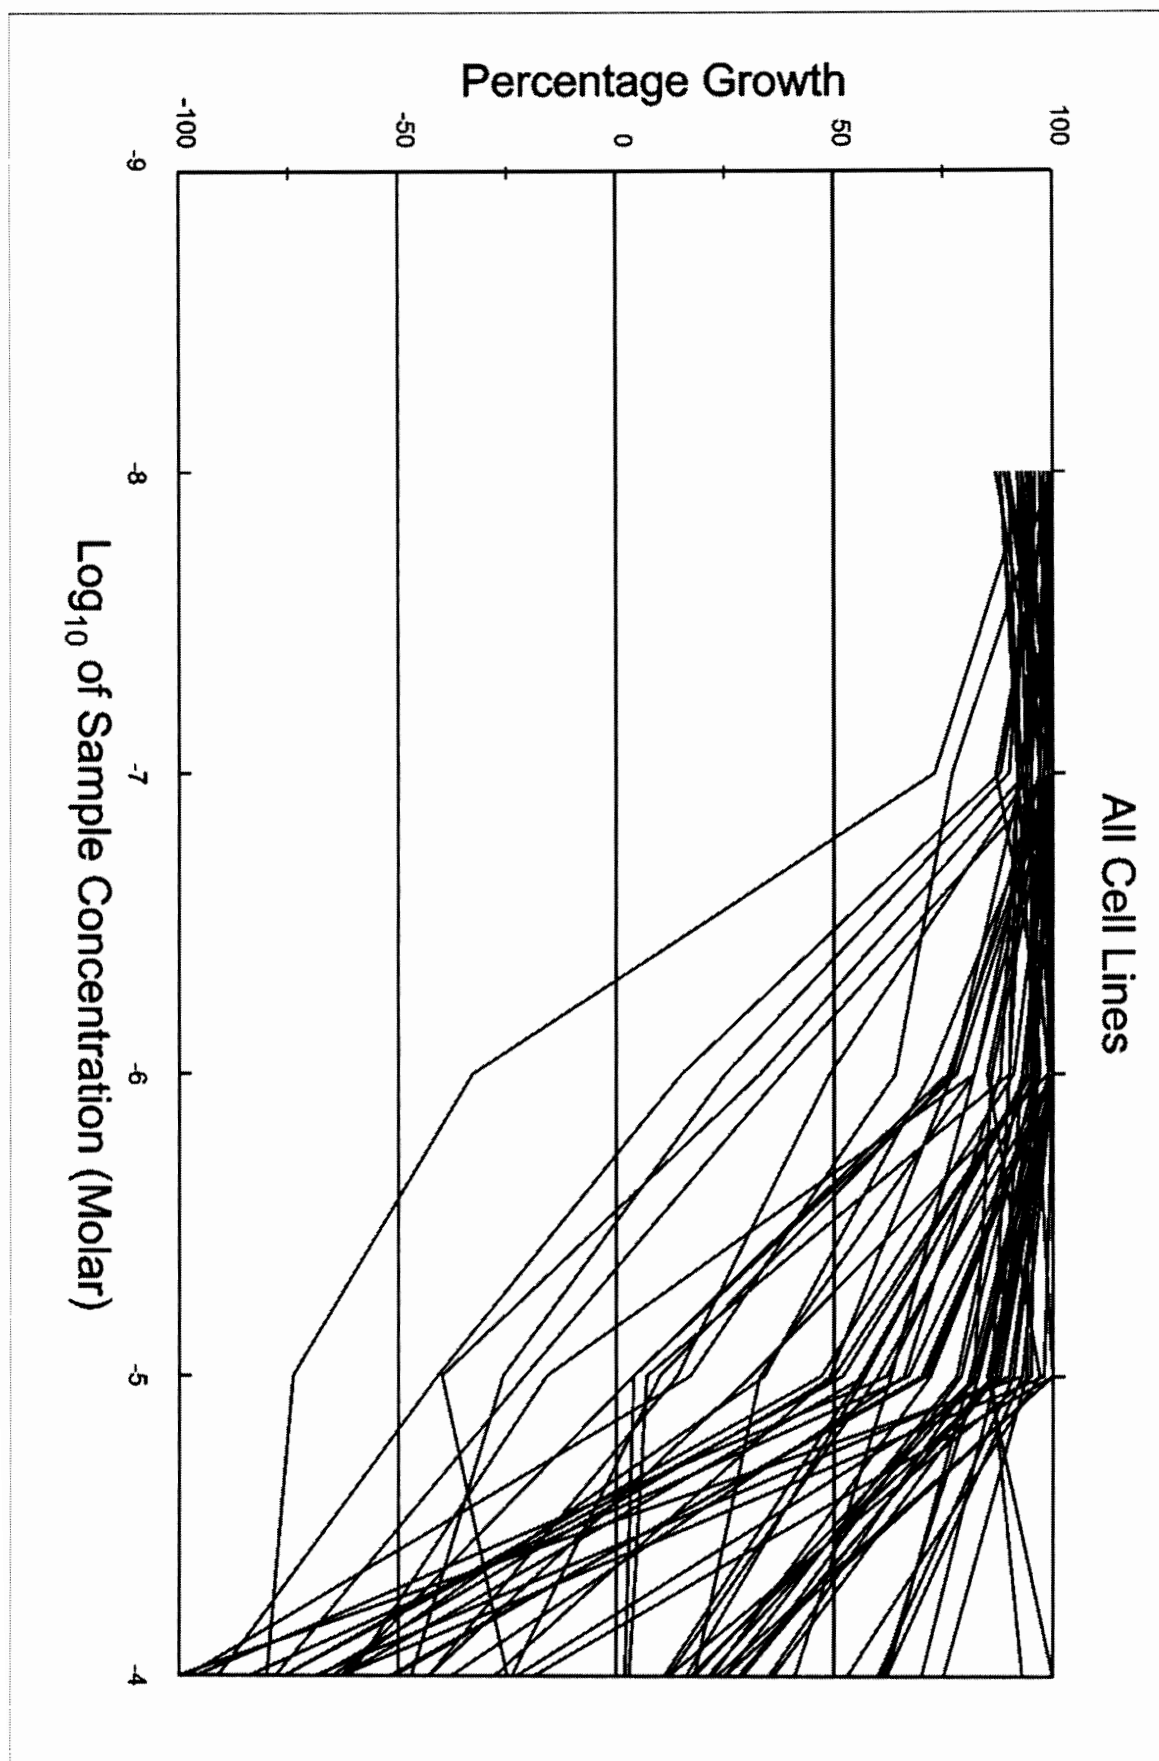

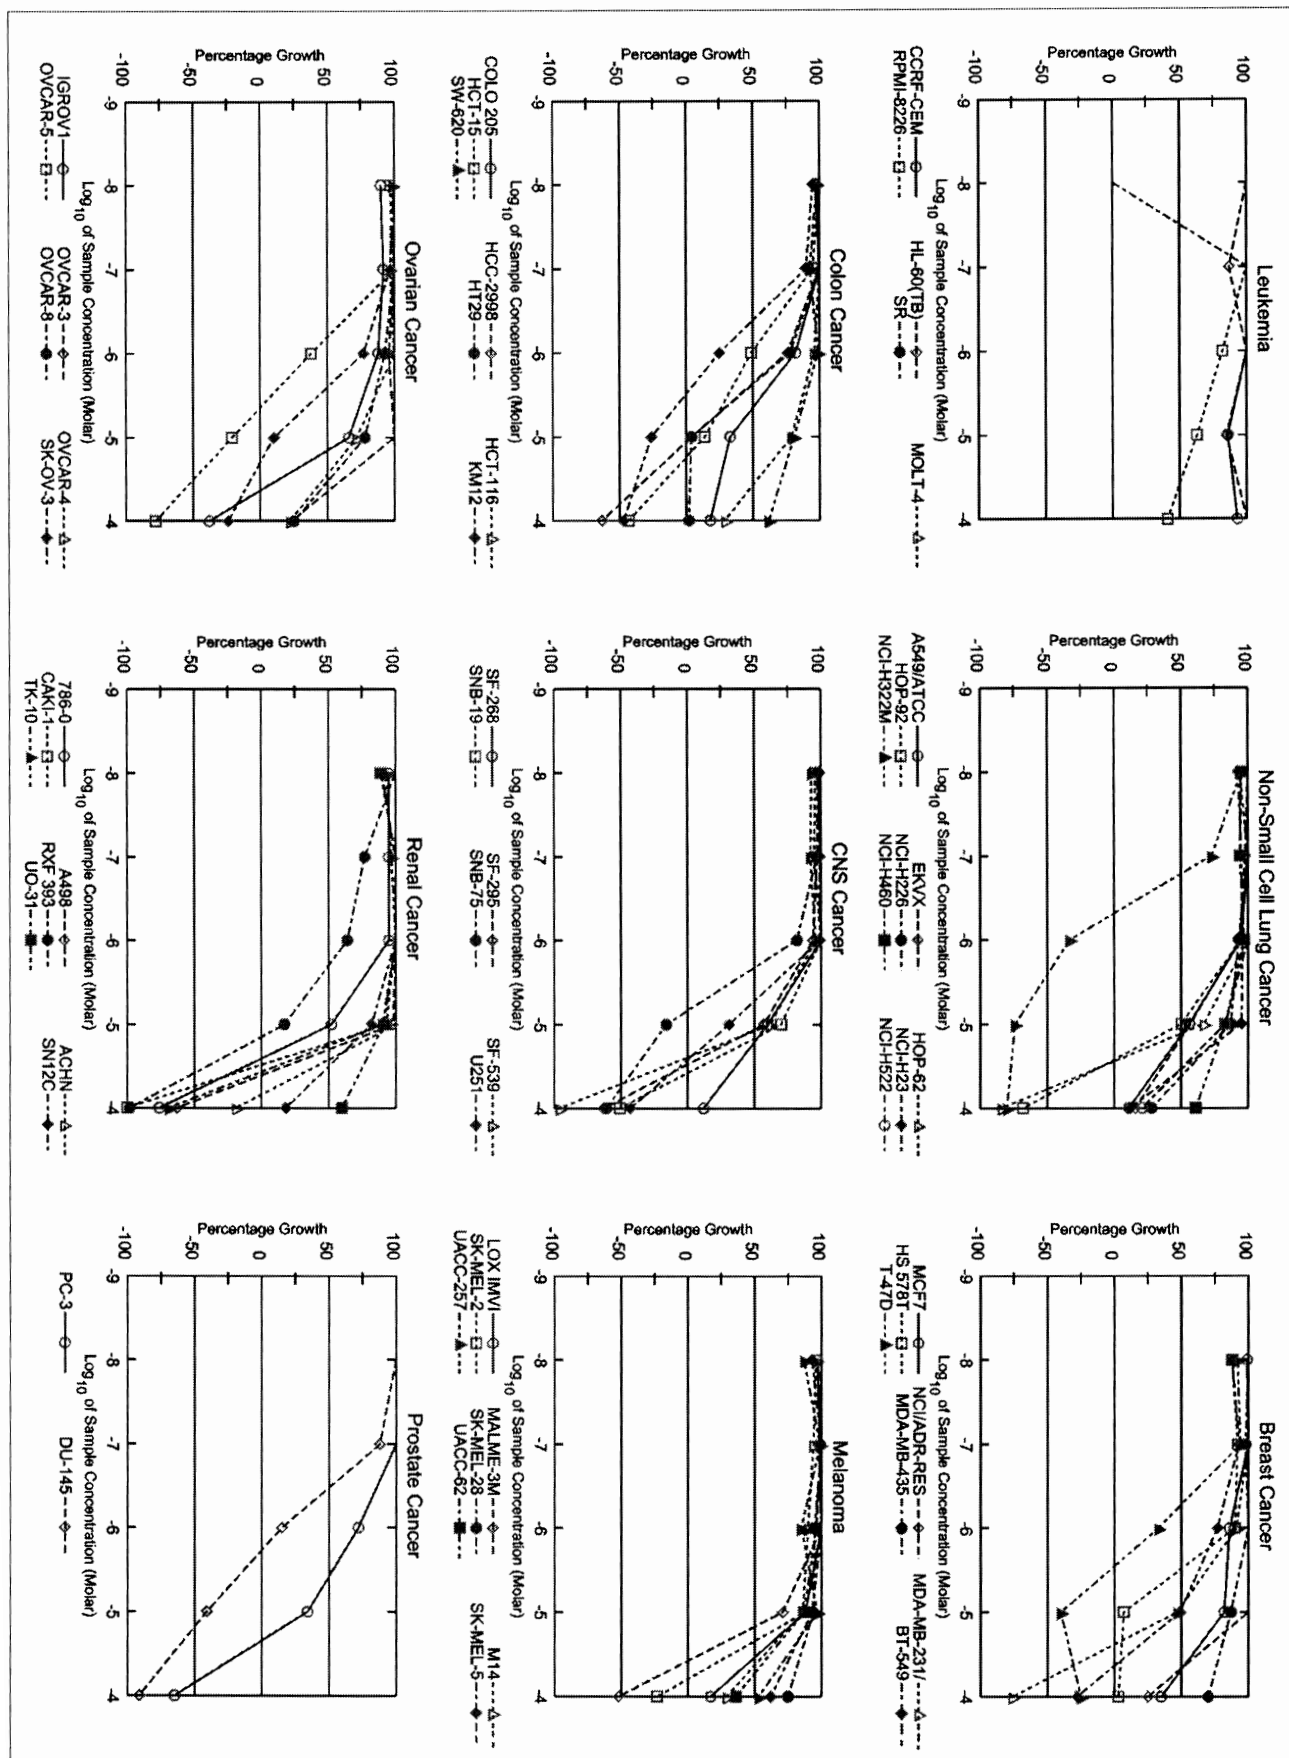

| Panel/Cell Line            | Time  | CHI   | Mean Optical Densities |       |       |       |        | Percent Growth |      |      |      |      | G560      | TGI       | LC50      |
|----------------------------|-------|-------|------------------------|-------|-------|-------|--------|----------------|------|------|------|------|-----------|-----------|-----------|
|                            |       |       | -8.0                   | -7.0  | -6.0  | -5.0  | -4.0   | -8.0           | -7.0 | -6.0 | -5.0 | -4.0 |           |           |           |
| Leukemia                   |       |       |                        |       |       |       |        |                |      |      |      |      |           |           |           |
| COEC-CEM                   | 0.581 | 2.129 | 2.227                  | 2.148 | 2.226 | 1.918 | 2.025  | 106            | 101  | 106  | 86   | 93   | > 1.00E-4 | > 1.00E-4 | > 1.00E-4 |
| HL-60(TB)                  | 0.274 | 0.777 | 0.867                  | 0.712 | 0.761 | 0.701 | 0.784  | 118            | 87   | 101  | 85   | 101  | > 1.00E-4 | > 1.00E-4 | > 1.00E-4 |
| MOLT-4                     | 0.251 | 1.003 | 1.001                  | 1.080 | 1.129 | 1.062 | 1.343  | 100            | 110  | 117  | 108  | 145  | > 1.00E-4 | > 1.00E-4 | > 1.00E-4 |
| RPW4-8226                  | 0.695 | 2.041 | 2.091                  | 1.797 | 1.593 | 1.253 |        | 102            | 104  | 82   | 63   | 41   | > 1.00E-4 | > 1.00E-4 | > 1.00E-4 |
| SR                         | 0.222 | 0.400 | 0.534                  | 0.830 | 0.928 | 0.776 | 0.690  |                | 341  | 396  | 311  | 263  | > 1.00E-4 | > 1.00E-4 | > 1.00E-4 |
| Non-Small Cell Lung Cancer |       |       |                        |       |       |       |        |                |      |      |      |      |           |           |           |
| AS46/ATCC                  | 0.306 | 1.475 | 1.539                  | 1.583 | 1.418 | 0.963 | 0.433  | 106            | 108  | 95   | 58   | 11   | 1.37E-5   | > 1.00E-4 | > 1.00E-4 |
| EXFV                       | 0.549 | 1.732 | 1.736                  | 1.706 | 1.680 | 1.227 | 0.743  | 100            | 90   | 94   | 57   | 16   | 1.31E-5   | > 1.00E-4 | > 1.00E-4 |
| HOP-82                     | 0.406 | 1.312 | 1.262                  | 1.326 | 1.369 | 1.014 | 0.066  | 104            | 102  | 106  | 67   | 34   | 1.30E-5   | > 1.00E-4 | > 1.00E-4 |
| HOP-92                     | 0.512 | 0.871 | 0.869                  | 0.884 | 0.852 | 0.892 | 0.163  | 100            | 104  | 95   | 50   | 48   | 1.00E-5   | > 1.00E-4 | > 1.00E-4 |
| NCH-H226                   | 0.581 | 1.850 | 1.873                  | 1.876 | 1.763 | 1.881 | 0.943  | 102            | 102  | 93   | 87   | 28   | 4.27E-5   | > 1.00E-4 | > 1.00E-4 |
| NCH-H223                   | 0.612 | 1.850 | 1.861                  | 1.879 | 1.685 | 1.678 | 0.747  | 93             | 95   | 96   | 95   | 12   | 3.48E-5   | > 1.00E-4 | > 1.00E-4 |
| NCH-H322M                  | 0.557 | 1.532 | 1.481                  | 1.288 | 0.375 | 0.146 | 0.114  | 95             | 74   | 33   | 74   | -80  | 1.85E-7   | > 1.00E-4 | > 1.00E-4 |
| NCH-H460                   | 0.215 | 2.184 | 2.094                  | 2.075 | 2.122 | 1.852 | 1.416  | 95             | 93   | 97   | 83   | 61   | > 1.00E-4 | > 1.00E-4 | > 1.00E-4 |
| NCH-H522                   | 0.249 | 0.686 | 0.696                  | 0.708 | 0.724 | 0.612 | 0.340  | 102            | 105  | 109  | 83   | 21   | 3.40E-5   | > 1.00E-4 | > 1.00E-4 |
| Colon Cancer               |       |       |                        |       |       |       |        |                |      |      |      |      |           |           |           |
| COLO 205                   | 0.340 | 1.410 | 1.376                  | 1.498 | 1.213 | 0.697 | 0.528  | 97             | 108  | 82   | 33   | 16   | 4.52E-6   | > 1.00E-4 | > 1.00E-4 |
| HCC-2998                   | 0.634 | 1.855 | 1.836                  | 2.222 | 1.559 | 0.679 | 0.238  | 96             | 130  | 76   | 4    | -63  | 2.27E-6   | > 1.00E-4 | > 1.00E-4 |
| HCT-116                    | 0.123 | 1.131 | 1.102                  | 1.171 | 1.093 | 0.922 | 0.419  | 97             | 104  | 96   | 79   | 29   | 3.85E-5   | > 1.00E-4 | > 1.00E-4 |
| HCT-15                     | 0.304 | 1.557 | 1.612                  | 1.497 | 0.921 | 0.485 | 0.172  | 104            | 96   | 49   | 14   | -43  | 9.64E-7   | > 1.00E-4 | > 1.00E-4 |
| HT29                       | 0.132 | 1.228 | 1.241                  | 1.251 | 0.985 | 0.178 | 0.158  | 101            | 102  | 78   | 4    | 2    | 2.39E-6   | > 1.00E-4 | > 1.00E-4 |
| KM12                       | 0.290 | 1.284 | 1.232                  | 1.184 | 0.540 | 0.214 | 0.154  | 95             | 90   | 25   | -26  | -47  | 4.13E-7   | > 1.00E-4 | > 1.00E-4 |
| SW-620                     | 0.186 | 1.404 | 1.380                  | 1.313 | 1.396 | 1.174 | 0.838  | 98             | 93   | 99   | 81   | 62   | > 1.00E-4 | > 1.00E-4 | > 1.00E-4 |
| CNS Cancer                 |       |       |                        |       |       |       |        |                |      |      |      |      |           |           |           |
| SF-268                     | 0.231 | 1.098 | 1.081                  | 1.173 | 1.112 | 0.755 | 0.334  | 98             | 109  | 102  | 60   | 12   | 1.64E-5   | > 1.00E-4 | > 1.00E-4 |
| SF-265                     | 0.678 | 2.223 | 2.301                  | 2.178 | 2.127 | 1.564 | 0.264  | 105            | 97   | 94   | 62   | -63  | 1.15E-5   | > 1.00E-4 | > 1.00E-4 |
| SF-539                     | 0.671 | 2.103 | 2.004                  | 1.995 | 2.050 | 1.555 | 0.030  | 93             | 92   | 96   | 57   | -29  | 1.19E-5   | > 1.00E-4 | > 1.00E-4 |
| SNB-19                     | 0.691 | 1.625 | 1.590                  | 1.574 | 1.648 | 1.343 | 0.339  | 96             | 95   | 102  | 70   | -51  | 1.46E-5   | > 1.00E-4 | > 1.00E-4 |
| SNB-75                     | 0.573 | 1.155 | 1.141                  | 1.136 | 1.049 | 0.482 | 0.222  | 98             | 97   | 82   | -16  | -61  | 2.11E-6   | > 1.00E-4 | > 1.00E-4 |
| U251                       | 0.275 | 1.286 | 1.279                  | 1.277 | 1.278 | 0.592 | 0.156  | 99             | 99   | 99   | 31   | -43  | 5.31E-6   | > 1.00E-4 | > 1.00E-4 |
| Melanoma                   |       |       |                        |       |       |       |        |                |      |      |      |      |           |           |           |
| LOX IMVI                   | 0.270 | 1.595 | 1.550                  | 1.577 | 1.690 | 1.442 | 0.498  | 97             | 99   | 107  | 88   | 17   | 3.45E-5   | > 1.00E-4 | > 1.00E-4 |
| MALME-3M                   | 0.514 | 0.959 | 0.979                  | 0.948 | 1.006 | 0.828 | 0.245  | 105            | 98   | 111  | 71   | -52  | 1.47E-5   | > 1.00E-4 | > 1.00E-4 |
| M14                        | 0.352 | 1.229 | 1.191                  | 1.174 | 1.141 | 1.104 | 0.606  | 96             | 94   | 90   | 86   | 29   | 4.26E-5   | > 1.00E-4 | > 1.00E-4 |
| SK-MEL-2                   | 0.890 | 1.909 | 1.953                  | 1.906 | 1.984 | 1.783 | 0.684  | 104            | 100  | 107  | 88   | -23  | 2.18E-5   | > 1.00E-4 | > 1.00E-4 |
| SK-MEL-28                  | 0.278 | 1.246 | 1.270                  | 1.280 | 1.203 | 1.190 | 1.007  | 102            | 103  | 95   | 94   | 75   | > 1.00E-4 | > 1.00E-4 | > 1.00E-4 |
| SK-MEL-5                   | 0.329 | 1.710 | 1.619                  | 1.740 | 1.744 | 1.610 | 1.188  | 93             | 102  | 102  | 93   | 62   | > 1.00E-4 | > 1.00E-4 | > 1.00E-4 |
| UACC-257                   | 0.748 | 1.857 | 1.713                  | 1.846 | 1.694 | 1.826 | 1.339  | 87             | 99   | 85   | 97   | 53   | > 1.00E-4 | > 1.00E-4 | > 1.00E-4 |
| UACC-62                    | 0.470 | 2.271 | 2.307                  | 2.313 | 2.191 | 2.039 | 1.116  | 102            | 102  | 96   | 87   | 36   | 5.30E-5   | > 1.00E-4 | > 1.00E-4 |
| Ovarian Cancer             |       |       |                        |       |       |       |        |                |      |      |      |      |           |           |           |
| IGROV1                     | 0.525 | 1.791 | 1.661                  | 1.695 | 1.641 | 1.355 | 0.328  | 90             | 92   | 88   | 66   | -38  | 1.41E-5   | > 1.00E-4 | > 1.00E-4 |
| OVCAR-3                    | 0.398 | 1.346 | 1.404                  | 1.361 | 1.313 | 1.375 | 0.671  | 106            | 102  | 96   | 103  | 23   | 4.56E-5   | > 1.00E-4 | > 1.00E-4 |
| OVCAR-4                    | 0.364 | 1.305 | 1.291                  | 1.276 | 1.325 | 1.044 | 0.571  | 99             | 97   | 102  | 72   | 22   | 2.77E-5   | > 1.00E-4 | > 1.00E-4 |
| OVCAR-5                    | 0.641 | 2.105 | 2.059                  | 2.198 | 1.192 | 0.509 | 0.140  | 97             | 106  | 38   | -21  | -78  | 6.60E-7   | > 1.00E-4 | > 1.00E-4 |
| OVCAR-8                    | 0.426 | 2.015 | 2.093                  | 2.117 | 1.907 | 1.672 | 0.830  | 105            | 106  | 93   | 78   | 25   | 3.44E-5   | > 1.00E-4 | > 1.00E-4 |
| SK-OV-3                    | 0.440 | 1.094 | 1.093                  | 1.073 | 0.944 | 0.508 | 0.336  | 100            | 97   | 77   | 10   | -24  | 2.55E-6   | > 1.00E-4 | > 1.00E-4 |
| Fetal Cancer               |       |       |                        |       |       |       |        |                |      |      |      |      |           |           |           |
| 786-O                      | 0.577 | 2.270 | 2.190                  | 2.190 | 2.192 | 1.452 | 0.140  | 95             | 95   | 95   | 52   | -76  | 1.03E-5   | > 1.00E-4 | > 1.00E-4 |
| A498                       | 1.303 | 1.859 | 1.801                  | 1.890 | 1.888 | 1.847 | 0.486  | 90             | 105  | 105  | 98   | -63  | 1.99E-5   | > 1.00E-4 | > 1.00E-4 |
| ACHN                       | 0.391 | 1.223 | 1.288                  | 1.324 | 1.318 | 1.224 | 0.319  | 108            | 112  | 112  | 100  | -19  | 2.64E-5   | > 1.00E-4 | > 1.00E-4 |
| CANC-1                     | 1.115 | 1.156 | 1.187                  | 1.148 | 1.148 | 1.073 | -0.001 | 108            | 111  | 105  | 93   | -100 | 1.98E-5   | > 1.00E-4 | > 1.00E-4 |
| RFX-393                    | 0.470 | 1.394 | 1.450                  | 1.246 | 1.161 | 0.856 | 0.017  | 109            | 77   | 64   | 17   | -98  | 1.98E-6   | > 1.00E-4 | > 1.00E-4 |
| SN12C                      | 0.417 | 1.713 | 1.732                  | 1.759 | 1.715 | 1.474 | 0.650  | 101            | 104  | 100  | 82   | 18   | 3.13E-5   | > 1.00E-4 | > 1.00E-4 |
| TK-10                      | 0.595 | 1.271 | 1.224                  | 1.248 | 1.287 | 1.205 | 0.183  | 93             | 97   | 102  | 90   | -69  | 1.79E-5   | > 1.00E-4 | > 1.00E-4 |
| UO-31                      | 0.584 | 2.027 | 1.869                  | 2.028 | 2.051 | 1.903 | 1.452  | 89             | 100  | 102  | 91   | 60   | > 1.00E-4 | > 1.00E-4 | > 1.00E-4 |
| Prostate Cancer            |       |       |                        |       |       |       |        |                |      |      |      |      |           |           |           |
| PC-3                       | 0.197 | 0.825 | 0.882                  | 0.864 | 0.647 | 0.408 | 0.068  | 109            | 106  | 72   | 34   | -65  | 3.70E-6   | > 1.00E-4 | > 1.00E-4 |
| DU-145                     | 0.270 | 1.197 | 1.236                  | 1.087 | 0.406 | 0.160 | 0.024  | 104            | 88   | 15   | -41  | -91  | 3.30E-7   | > 1.00E-4 | > 1.00E-4 |
| Breast Cancer              |       |       |                        |       |       |       |        |                |      |      |      |      |           |           |           |
| MCF7                       | 0.353 | 1.817 | 1.801                  | 1.868 | 1.619 | 1.560 | 0.871  | 99             | 103  | 86   | 82   | 35   | 4.89E-5   | > 1.00E-4 | > 1.00E-4 |
| NCIADR-RES                 | 0.411 | 1.162 | 1.317                  | 1.188 | 1.240 | 1.178 | 0.801  | 121            | 109  | 110  | 82   | 25   | 4.77E-5   | > 1.00E-4 | > 1.00E-4 |
| MDAMB-231(ATCC)            | 0.452 | 1.258 | 1.307                  | 1.282 | 1.183 | 0.882 | 0.109  | 106            | 103  | 91   | 47   | -78  | 8.60E-6   | > 1.00E-4 | > 1.00E-4 |
| HS 578T                    | 0.482 | 0.987 | 0.926                  | 0.646 | 0.934 | 0.520 | 0.049  | 86             | 82   | 90   | 17   | 3    | 3.02E-6   | > 1.00E-4 | > 1.00E-4 |
| MDAMB-435                  | 0.367 | 1.663 | 1.701                  | 1.634 | 1.661 | 1.469 | 1.275  | 103            | 88   | 101  | 87   | 70   | > 1.00E-4 | > 1.00E-4 | > 1.00E-4 |
| BT-549                     | 0.683 | 1.544 | 1.443                  | 1.468 | 1.347 | 1.107 | 0.485  | 86             | 93   | 77   | 49   | -28  | 9.38E-6   | > 1.00E-4 | > 1.00E-4 |
| T-47D                      | 0.610 | 1.395 | 1.334                  | 1.345 | 0.866 | 0.369 | 0.459  | 92             | 94   | 33   | 40   | -25  | 5.18E-7   | > 1.00E-4 | > 1.00E-4 |

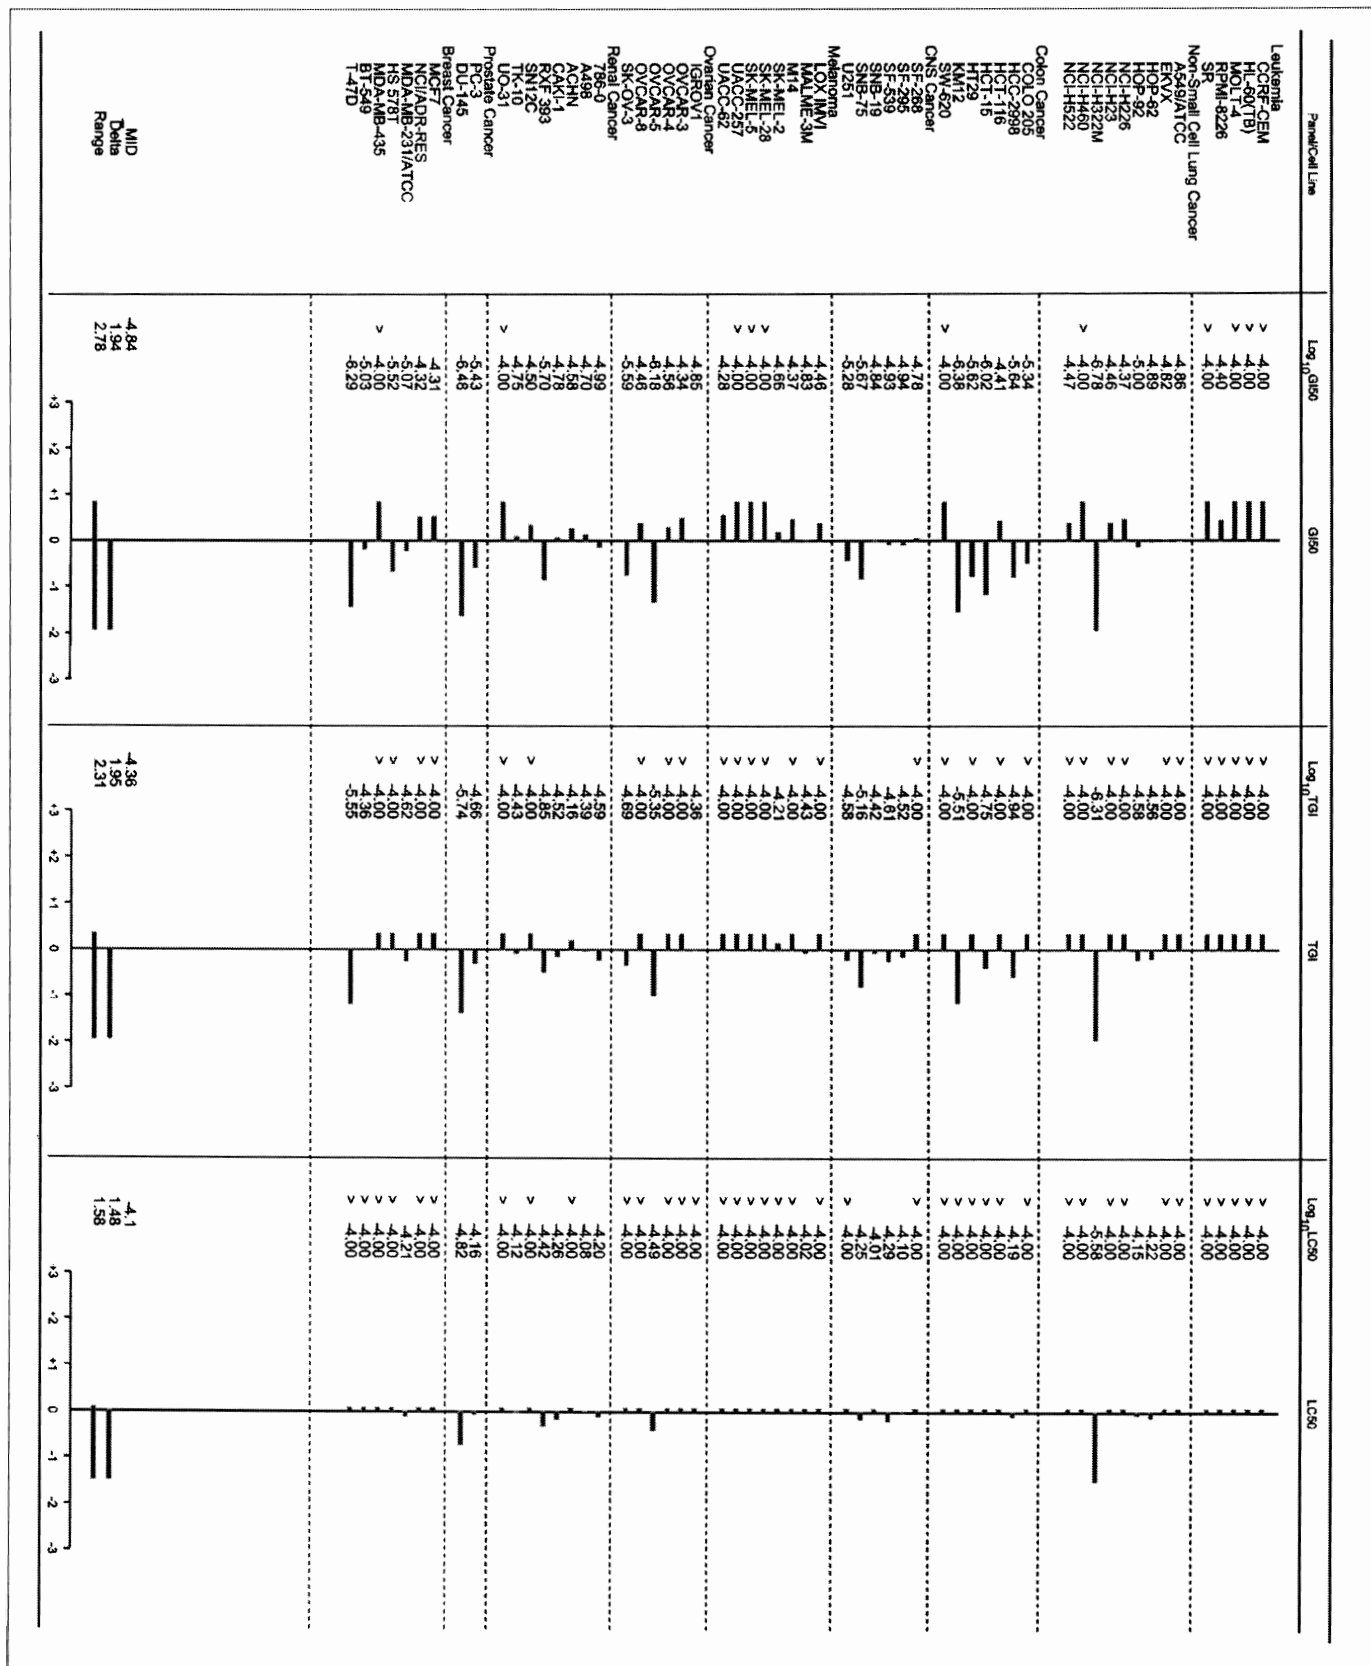

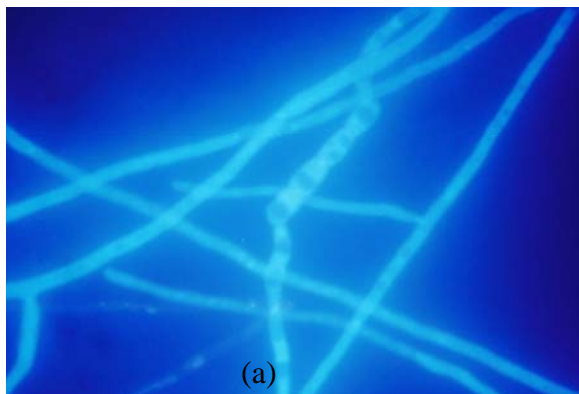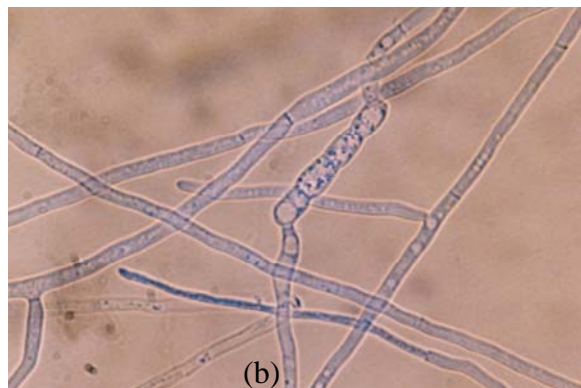

Mycelia of *F. solani* after exposure with coumarine (a) under fluorescence microscope  
(b) under light microscope

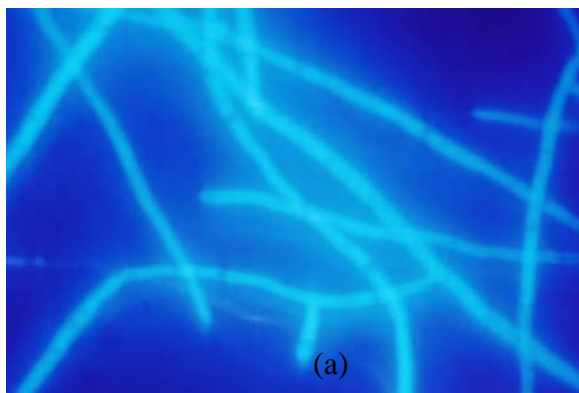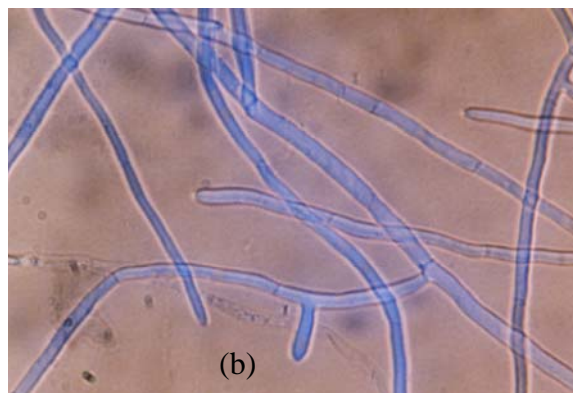

Mycelia of *F. oxysporium* after exposure with coumarine (a). under fluorescence microscope (b) under light microscope

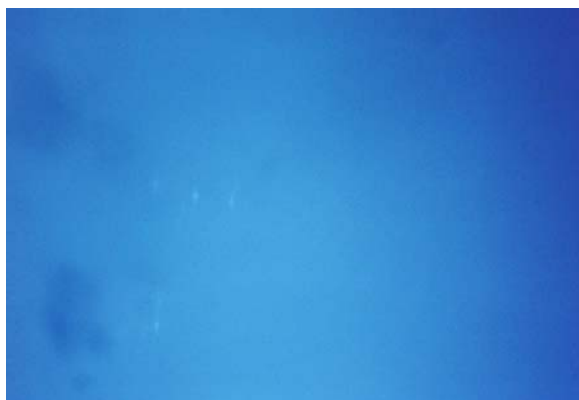

Mycelia untreated with fluorescence compound under fluorescence microscope: no autofluorescence has been observed

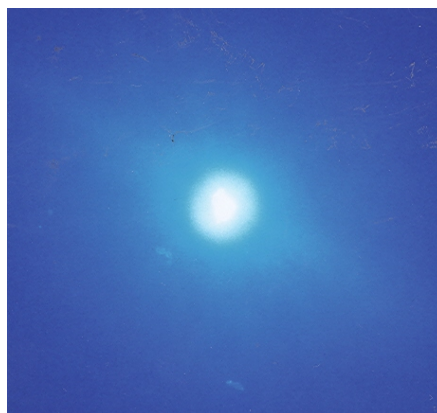

KF-coumarine under fluorescence microscope



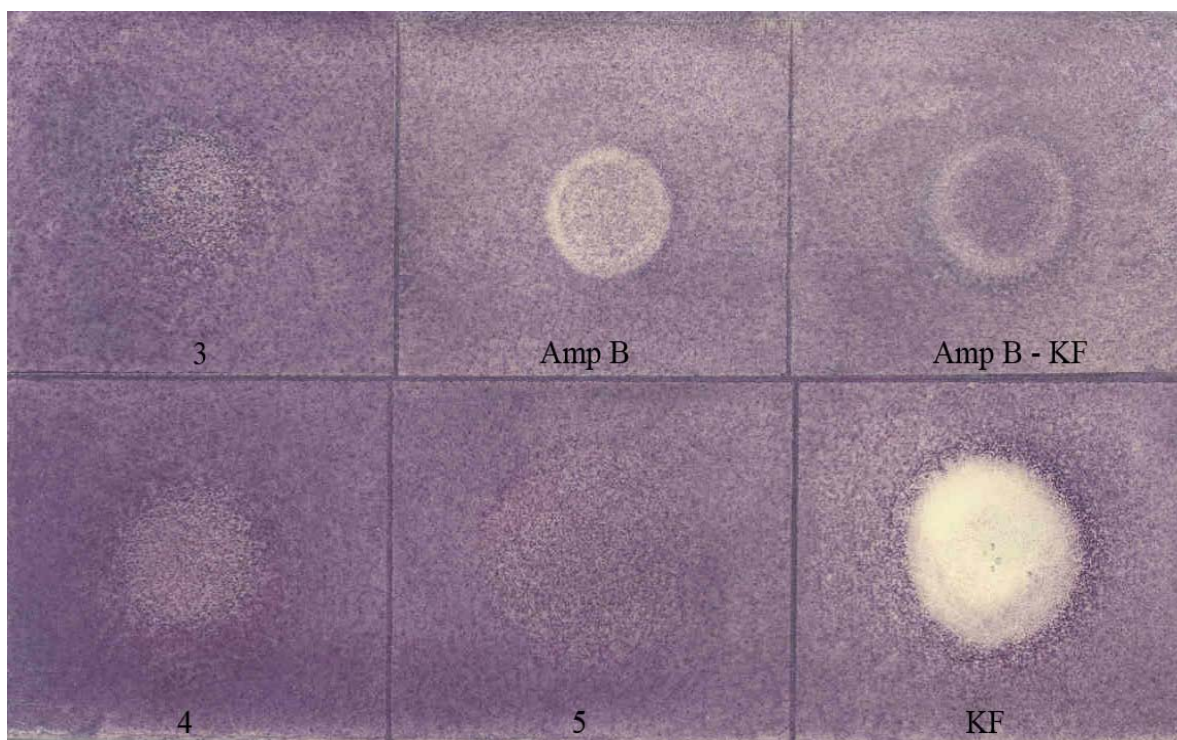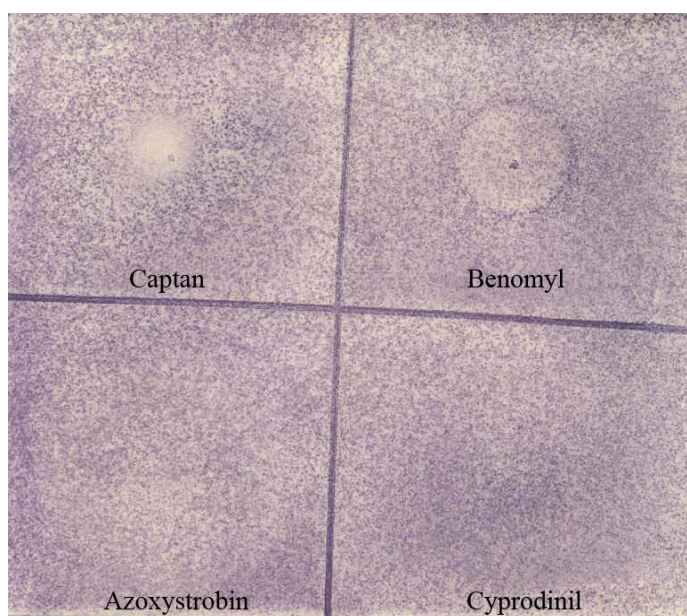

Bioautography plate of **3**, **4** and **5** against *Fusarium solani* after spraying with MTT.

Standards: Amp B: amphotericin B, AmpB-KF: Amphotericin B plus KF (1:1), Captan, Benomyl, Azoxystrobin and Cyprodinil.

Control : KF: kahalalide F.

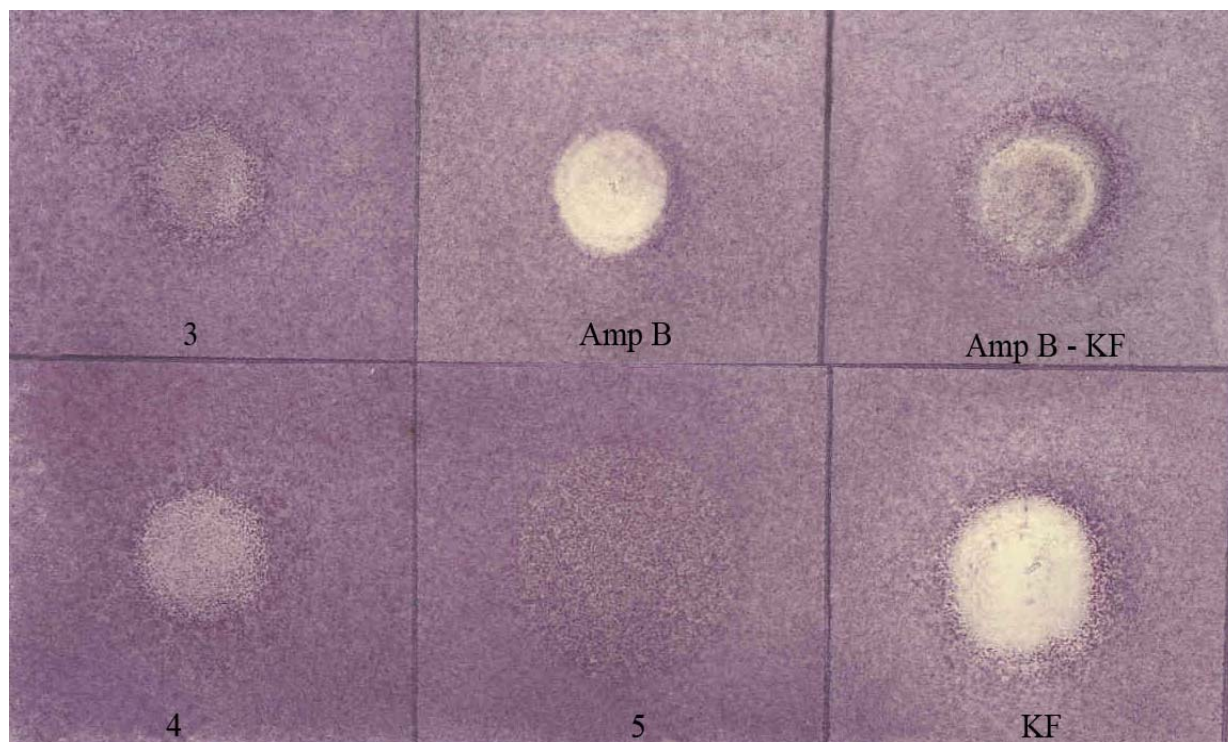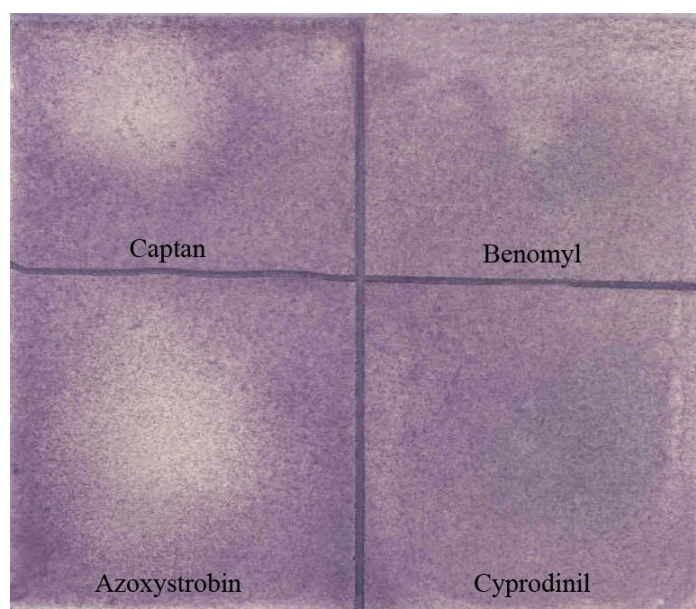

Bioautography plate of **3**, **4** and **5** against *Fusarium oxysporium* after spraying with MTT.

Standards: Amp B: amphotericin B, AmpB-KF: Amphotericin B plus KF (1:1), Captan, Benomyl, Azoxystrobin and Cyprodinil.

Control : KF: kahalalide F.



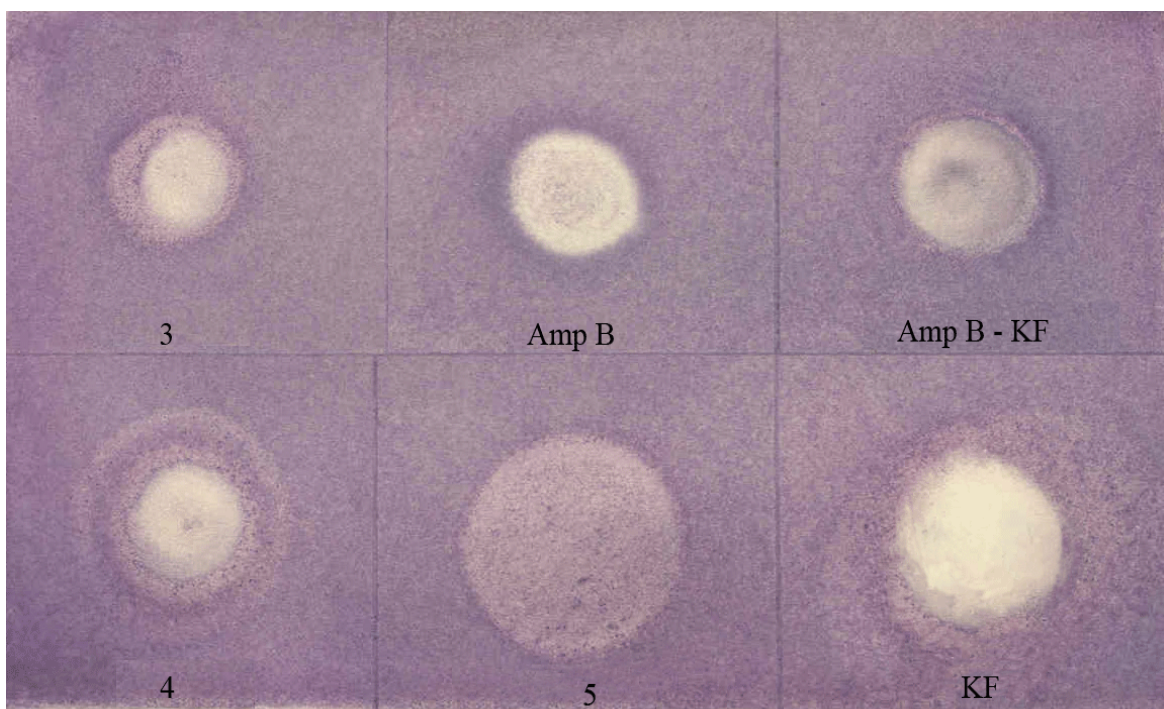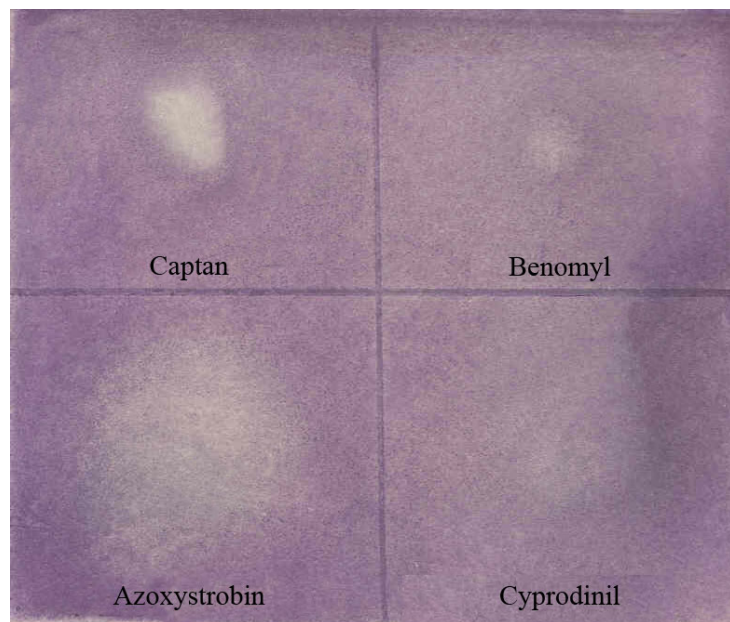

Bioautography plate of **3**, **4** and **5** against *Fusarium proliferatum* after spraying with MTT.

Standards: Amp B: amphotericin B, AmpB-KF: Amphotericin B plus KF (1:1), Captan, Benomyl, Azoxystrobin and Cyprodinil.

Control : KF: kahalalide F.
